# Supplementary material for: Genomic Analysis Points to Multiple Genetic Mechanisms for Non-Transformable Campylobacter jejuni ST-50
Source: MDPI journal article supplement (doi:10.3390/microorganisms12020327), 2024-02-04
Supplement: s1 [file s1]

**Table S1.** *Campylobacter* strains used in transformation study

| <i>C. jejuni</i><br>strains | ST    | GenBank<br>assembly | Source  | Year <sup>1</sup> | Country | U.S.<br>State | AMR <sup>2</sup> |
|-----------------------------|-------|---------------------|---------|-------------------|---------|---------------|------------------|
| FSIS11812945                | 10398 | GCA_005367025.1     | Chicken | 2018              | U.S.    |               | -                |
| FSIS11812081                | 2132  | GCA_005345325.1     | Chicken | 2018              | U.S.    |               | -                |
| FSIS11810577                | 353   | GCA_005308685.1     | Chicken | 2018              | U.S.    |               | -                |
| FSIS11706266                | 464   | GCA_005196475.1     | Chicken | 2017              | U.S.    |               | -                |
| FSIS11811270                | 50    | GCA_005319705.1     | Chicken | 2018              | U.S.    | SC            | -                |
| FSIS11812063                | 50    | GCA_005346505.1     | Chicken | 2018              | U.S.    | DE            | -                |
| FSIS12028218                | 50    | GCA_013787785.1     | Chicken | 2020              | U.S.    | PA            | T                |
| FSIS12028305                | 50    | GCA_010916015.1     | Chicken | 2020              | U.S.    | GA            | T                |
| FSIS12029464                | 50    | GCA_011988645.1     | Chicken | 2020              | U.S.    | GA            | -                |
| FSIS12029904                | 50    | GCA_012862935.1     | Chicken | 2020              | U.S.    | GA            | -                |
| FSIS12030287                | 50    | GCA_013800385.1     | Chicken | 2020              | U.S.    | GA            | -                |
| FSIS12030565                | 50    | GCA_013158105.1     | Chicken | 2020              | U.S.    | VA            | -                |
| FSIS12030692                | 50    | GCA_013158405.1     | Chicken | 2020              | U.S.    | TN            | TK               |
| FSIS12030816                | 50    | GCA_013802355.1     | Chicken | 2020              | U.S.    | ME            | -                |
| FSIS12031002                | 50    | GCA_013742095.1     | Chicken | 2020              | U.S.    | ME            | -                |
| FSIS12031145                | 50    | GCA_013585715.1     | Chicken | 2020              | U.S.    | GA            | -                |
| FSIS22028286                | 50    | GCA_013718365.1     | Chicken | 2020              | U.S.    | PA            | -                |
| FSIS22028636                | 50    | GCA_013514075.1     | Chicken | 2020              | U.S.    | MD            | -                |
| FSIS1607853                 | 50    | GCA_005199775.1     | Chicken | 2016              | U.S.    | WI            | T                |
| FSIS1608758                 | 50    | GCA_005115065.1     | Chicken | 2016              | U.S.    | GA            | -                |
| FSIS1609357                 | 50    | GCA_005127145.1     | Chicken | 2016              | U.S.    | FL            | -                |
| FSIS1609374                 | 50    | GCA_005164265.1     | Chicken | 2016              | U.S.    | GA            | -                |
| FSIS1709833                 | 50    | GCA_005127925.1     | Chicken | 2016              | U.S.    | AL            | T                |
| FSIS1710700                 | 50    | GCA_005018415.1     | Chicken | 2017              | U.S.    | FL            | -                |
| FSIS1710996                 | 50    | GCA_005268315.1     | Chicken | 2017              | U.S.    | IL            | QT               |
| FSIS1701236                 | 50    | GCA_005275875.1     | Chicken | 2017              | U.S.    | WA            | T                |
| FSIS1702913                 | 50    | GCA_005190995.1     | Chicken | 2017              | U.S.    | TX            | -                |
| FSIS1703025                 | 50    | GCA_005002075.1     | Chicken | 2017              | U.S.    | IN            | QT               |
| FSIS11705500                | 50    | GCA_004994685.1     | Chicken | 2017              | U.S.    | LA            | QT               |
| FSIS21720655                | 50    | GCA_004986225.1     | Chicken | 2017              | U.S.    | AL            | QT               |
| FSIS21720686                | 50    | GCA_005056765.1     | Chicken | 2017              | U.S.    | GA            | -                |
| FSIS21820901                | 50    | GCA_005187145.1     | Chicken | 2017              | U.S.    | SC            | -                |
| FSIS1606748                 | 50    | GCA_005293385.1     | Cattle  | 2016              | U.S.    | PA            | TK               |
| FSIS1607146                 | 50    | GCA_005296665.1     | Cattle  | 2016              | U.S.    | NE            | T                |
| FSIS1701497                 | 50    | GCA_005010355.1     | Cattle  | 2017              | U.S.    | MD            | QT               |
| FSIS11812592                | 50    | GCA_005350855.1     | Cattle  | 2018              | U.S.    | KS            | T                |
| FSIS11917669                | 50    | GCA_004885245.1     | Swine   | 2019              | U.S.    | MO            | -                |

|              |     |                 |         |      |        |    |    |
|--------------|-----|-----------------|---------|------|--------|----|----|
| FSIS11918239 | 50  | GCA_004896895.1 | Swine   | 2019 | U.S.   | KS | -  |
| FSIS12028219 | 50  | GCA_011722735.1 | Cattle  | 2020 | U.S.   | MD | -  |
| FSIS12032984 | 50  | GCA_014547025.1 | Lamb    | 2020 | U.S.   | GA | T  |
| FSIS12033376 | 50  | GCA_014660295.1 | Cattle  | 2020 | U.S.   | MI | -  |
| FSIS12138180 | 50  | GCA_019563335.1 | Cattle  | 2021 | U.S.   | MI | T  |
| FSIS11814023 | 939 | GCA_004810515.1 | Chicken | 2018 | U.S.   |    | -  |
| FSIS12028216 | 939 | GCA_011723555.1 | Chicken | 2020 | U.S.   |    | TK |
| FSIS12028439 | 939 | GCA_010905265.1 | Chicken | 2020 | U.S.   |    | T  |
| FSIS12030679 | 939 | GCA_013158065.1 | Chicken | 2020 | U.S.   |    | -  |
| FSIS12031025 | 939 | GCA_013731875.1 | Chicken | 2020 | U.S.   |    | K  |
| FSIS12031178 | 939 | GCA_013730685.1 | Chicken | 2020 | U.S.   |    | T  |
| FSIS12031661 | 939 | GCA_013497495.1 | Chicken | 2020 | U.S.   |    | -  |
| FSIS12031779 | 939 | GCA_013447495.1 | Chicken | 2020 | U.S.   |    | -  |
| FSIS22027247 | 939 | GCA_011501785.1 | Chicken | 2020 | U.S.   |    | -  |
| FSIS22027921 | 939 | GCA_012976125.1 | Chicken | 2020 | U.S.   |    | -  |
| FSIS22028453 | 939 | GCA_013653585.1 | Chicken | 2020 | U.S.   |    | -  |
| FSIS32003146 | 939 | GCA_010311025.1 | Chicken | 2020 | U.S.   |    | K  |
| RM 3405      | 50  | GCA_032970625.1 | Human   | 1979 | Canada |    | -  |
| RM 3412      | 50  | GCA_032970685.1 | Human   | 1979 | Canada |    | T  |
| RM 5146      | 50  | GCF_032290505.1 | Human   | Unk  | Italy  |    | T  |
| RM 5148      | 50  | GCF_032290485.1 | Human   | Unk  | Italy  |    | T  |
| RM 5149      | 50  | GCF_032290445.1 | Human   | Unk  | Italy  |    | TQ |
| RM 5156      | 50  | GCF_032290405.1 | Chicken | Unk  | Italy  |    | T  |

| <i>C. coli</i><br>strains | ST   | GenBank<br>assembly | Source  | Year |      | AMR |
|---------------------------|------|---------------------|---------|------|------|-----|
| FSIS11813367              | 1050 | GCA_005374845.1     | Chicken | 2018 | U.S. | -   |
| FSIS1710488               | 7818 | GCA_005253605.1     | Chicken | 2017 | U.S. | -   |
| FSIS1710329               | 7818 | GCA_005257475.1     | Chicken | 2017 | U.S. | -   |
| FSIS11811291              | 829  | GCA_005319505.1     | Chicken | 2018 | U.S. | E   |
| FSIS11813365              | 829  | GCA_005374965.1     | Chicken | 2018 | U.S. | E   |
| FSIS1607221               | 829  | GCA_005297805.1     | Chicken | 2016 | U.S. | -   |
| FSIS21822106              | 829  | GCA_004808275.1     | Chicken | 2018 | U.S. | -   |
| FSIS11813852              | 902  | GCA_005379785.1     | Chicken | 2018 | U.S. | Q   |
| FSIS1710767               | 3262 | GCA_005258115.1     | Chicken | 2017 | U.S. | Q   |
| FSIS12027778              | 3262 | GCA_010217935.1     | Chicken | 2020 | U.S. | Q   |
| FSIS12030275              | 3262 | GCA_012975605.1     | Chicken | 2020 | U.S. | Q   |
| FSIS12031023              | 3262 | GCA_013731895.1     | Chicken | 2020 | U.S. | Q   |
| FSIS12031175              | 3262 | GCA_013730735.1     | Chicken | 2020 | U.S. | -   |
| FSIS12031458              | 3262 | GCA_013622705.1     | Chicken | 2020 | U.S. | Q   |
| FSIS12031835              | 3262 | GCA_013447195.1     | Chicken | 2020 | U.S. | -   |

|              |      |                 |         |      |   |
|--------------|------|-----------------|---------|------|---|
| FSIS12031855 | 3262 | GCA_013443435.1 | Chicken | 2020 | Q |
| FSIS22027509 | 3262 | GCA_011998725.1 | Chicken | 2020 | Q |
| FSIS22028223 | 3262 | GCA_013760625.1 | Chicken | 2020 | Q |
| FSIS22028629 | 3262 | GCA_013514015.1 | Chicken | 2020 | Q |

<sup>1-</sup> Unk- unknown year

<sup>2</sup> -: pan-sensitive; T: Tetracycline resistant; K: Kanamycin resistant; E: Erythromycin resistant; Q: Quinolone resistant
