# Supplementary material for: Genomic Analysis Points to Multiple Genetic Mechanisms for Non-Transformable Campylobacter jejuni ST-50
Source: MDPI journal article supplement (doi:10.3390/microorganisms12020327), 2024-02-04
Supplement: s1 [file s1]

| Selected | index | ID | Cjc_cgc_10 | Cjc_cgc_100 | Cjc_cgc_200 | Cjc_cgc_25 |      |
|----------|-------|----|------------|-------------|-------------|------------|------|
|          |       | 1  | 6310       | 239         | 66          | 23         | 217  |
|          |       | 2  | 22255      | 1126        | 24          | 23         | 885  |
|          |       | 3  | 30569      | 2087        | 858         | 398        | 1543 |
|          |       | 4  | 32893      | 20          | 16          | 23         | 19   |
|          |       | 5  | 37570      | 27          | 23          | 22         | 26   |
|          |       | 6  | 39737      | 8589        | 858         | 398        | 2330 |
|          |       | 7  | 40513      | 27          | 23          | 22         | 26   |
|          |       | 8  | 43339      | 27          | 23          | 22         | 26   |
|          |       | 9  | 48402      | 5268        | 66          | 23         | 3439 |
|          |       | 10 | 51553      |             |             |            |      |
|          |       | 11 | 56445      | 27          | 23          | 22         | 26   |
|          |       | 12 | 56604      | 20          | 16          | 23         | 19   |
|          |       | 13 | 57531      | 11727       | 24          | 23         | 3916 |
|          |       | 14 | 57783      | 578         | 133         | 23         | 185  |
|          |       | 15 | 60600      |             |             |            |      |
|          |       | 16 | 61660      | 6885        | 658         | 457        | 4518 |
|          |       | 17 | 62031      | 7719        | 24          | 23         | 3916 |
|          |       | 18 | 62368      | 7034        | 24          | 23         | 4643 |
|          |       | 19 | 62797      | 20          | 16          | 23         | 19   |
|          |       | 20 | 69767      | 7552        | 120         | 100        | 2127 |
|          |       | 21 | 69781      | 7559        | 120         | 100        | 2127 |
|          |       | 22 | 70110      | 6509        | 66          | 23         | 4264 |
|          |       | 23 | 70943      | 8001        | 2463        | 1504       | 5236 |
|          |       | 24 | 76581      | 7554        | 120         | 100        | 2127 |
|          |       | 25 | 76902      | 27          | 23          | 22         | 26   |
|          |       | 26 | 77678      | 8711        | 24          | 23         | 5667 |
|          |       | 27 | 79837      | 20          | 16          | 23         | 19   |
|          |       | 28 | 80734      | 9340        | 24          | 23         | 3916 |
|          |       | 29 | 83558      | 10516       | 24          | 23         | 3916 |
|          |       | 30 | 84435      | 5304        | 24          | 23         | 305  |
|          |       | 31 | 92074      | 9943        | 24          | 23         | 6497 |
|          |       | 32 | 92223      | 13017       | 24          | 23         | 8355 |
|          |       | 33 | 92532      | 13079       | 24          | 23         | 8397 |
|          |       | 34 | 92583      | 13096       | 24          | 23         | 3916 |
|          |       | 35 | 92597      | 13101       | 3161        | 1785       | 7703 |
|          |       | 36 | 92750      | 5304        | 24          | 23         | 305  |
|          |       | 37 | 92951      | 13186       | 24          | 23         | 3916 |
|          |       | 38 | 92959      | 13059       | 24          | 23         | 3916 |
|          |       | 39 | 93123      | 13209       | 24          | 23         | 3916 |
|          |       | 40 | 93493      | 9487        | 34          | 23         | 6188 |

|    |        |       |      |    |       |
|----|--------|-------|------|----|-------|
| 41 | 93623  | 13315 | 24   | 23 | 3916  |
| 42 | 93697  | 13330 | 24   | 23 | 7549  |
| 43 | 93736  | 12757 | 3312 | 23 | 8199  |
| 44 | 93773  | 13348 | 24   | 23 | 8551  |
| 45 | 98915  | 9397  | 24   | 23 | 3916  |
| 46 | 98987  | 5304  | 24   | 23 | 305   |
| 47 | 99148  | 9487  | 34   | 23 | 6188  |
| 48 | 99443  | 9673  | 24   | 23 | 6327  |
| 49 | 103252 | 13017 | 24   | 23 | 8355  |
| 50 | 104567 | 9787  | 34   | 23 | 6398  |
| 51 | 104732 | 9889  | 24   | 23 | 6465  |
| 52 | 106388 | 16571 | 24   | 23 | 10510 |
| 53 | 110094 | 17094 | 24   | 23 | 305   |
| 54 | 110642 |       |      |    |       |
| 55 | 111135 | 7985  | 24   | 23 | 5226  |
| 56 | 111508 | 17311 | 4223 | 23 | 11045 |
| 57 | 111713 | 17354 | 24   | 23 | 11074 |
| 58 | 111728 | 17354 | 24   | 23 | 11074 |
| 59 | 114671 | 342   | 24   | 23 | 305   |
| 60 | 116314 | 29860 | 24   | 23 | 19695 |
| 61 | 116315 | 29861 | 24   | 23 | 19696 |
| 62 | 116316 | 29862 | 7865 | 23 | 19697 |
| 63 | 116317 | 29863 | 7866 | 23 | 19698 |

| Cjc_cgc_5 | Cjc_cgc_50 | comments      | continent     | country       | isolate      | penner |
|-----------|------------|---------------|---------------|---------------|--------------|--------|
| 249       | 185        |               | Europe        | UK [England]  | OXC453       |        |
| 1248      | 26         |               | Europe        | UK [England]  | OXC7071      |        |
| 2425      | 1146       |               | Europe        | UK [England]  | OXC8885      |        |
| 777       | 18         |               | Europe        | UK [England]  | OXC9837      |        |
| 27        | 25         | Grey seal pup | Europe        | UK [Scotland] | Seal183      |        |
| 3906      | 1674       | iCaMPS3       | Europe        | UK [Scotland] | B0050        |        |
| 27        | 25         | iCaMPS3       | Europe        | UK [Scotland] | C0788        |        |
| 27        | 25         | Scottish_FSA  | Europe        | UK [Scotland] | C0261        |        |
| 6437      | 80         | iCaMPS-4      | Europe        | UK [Scotland] | ARI4066      |        |
|           |            | meat          | Europe        | Spain         | 11_S10       |        |
| 27        | 25         | iCaMPS-4      | Europe        | UK [Scotland] | ARI4473      |        |
| 5478      | 18         | iCaMPS-4      | Europe        | UK [Scotland] | C1585        |        |
| 7410      | 2754       | crow          | North America | USA           | BCW_6872     |        |
| 622       | 162        |               | Europe        | UK            | chick50      |        |
|           |            |               | North America | Canada        | RM3412       |        |
| 8492      | 3169       | Lamb/Sheep    | Europe        | UK            | FDI295       |        |
| 8598      | 2754       | Animal-Cattle | North America | USA           | FSIS1606748  |        |
| 8654      | 26         |               | Europe        | France        | AC0745       |        |
| 777       | 18         |               | Europe        | UK [England]  | NWC1796      |        |
| 9366      | 148        |               | Oceania       | New Zealand   | 16CC0850     |        |
| 9375      | 148        |               | Oceania       | New Zealand   | 16CC0947     |        |
| 8024      | 80         |               | Europe        | UK            | FDI452       |        |
| 9921      | 3613       |               | Europe        | Finland       | Po_1         |        |
| 10374     | 148        |               | Europe        | UK [England]  | NWC2398      |        |
| 27        | 25         |               | Europe        | UK            | FDI580       |        |
| 10867     | 3864       |               | Europe        | UK            | PHEHIST096   |        |
| 777       | 18         |               | Europe        | UK [England]  | RL16000343   |        |
| 11639     | 2754       | rMLST indicat | North America | USA           | PS00309      |        |
| 13024     | 2754       |               | North America | USA           | 2016D-0258   |        |
| 6480      | 26         |               | North America | USA           | 2016D-0064   |        |
| 12327     | 4372       | USDA-FSIS; S  | North America | USA           | FSIS1701236  |        |
| 16220     | 5421       | USDA-FSIS; S  | North America | USA           | FSIS1710996  |        |
| 16293     | 4066       | USDA-FSIS; S  | North America | USA           | FSIS1607853  |        |
| 16314     | 2754       | USDA-FSIS; S  | North America | USA           | FSIS1702913  |        |
| 16319     | 5049       | USDA-FSIS; S  | North America | USA           | FSIS21820901 |        |
| 6480      | 26         | USDA-FSIS; S  | North America | USA           | FSIS1609374  |        |
| 16422     | 2754       | USDA-FSIS; S  | North America | USA           | FSIS1709833  |        |
| 16269     | 2754       | USDA-FSIS; S  | North America | USA           | FSIS1609357  |        |
| 16454     | 2754       | USDA-FSIS; S  | North America | USA           | FSIS1608758  |        |
| 11803     | 4188       | USDA-FSIS; S  | North America | USA           | FSIS21720686 |        |

|       |       |              |              |             |              |      |
|-------|-------|--------------|--------------|-------------|--------------|------|
| 16584 | 2754  | USDA-FSIS; S | North Americ | USA         | FSIS1710700  |      |
| 16602 | 2685  | USDA-FSIS; S | North Americ | USA         | FSIS1703025  |      |
| 15893 | 5329  | USDA-FSIS; S | North Americ | USA         | FSIS11705500 |      |
| 16622 | 4202  | USDA-FSIS; S | North Americ | USA         | FSIS21720655 |      |
| 15000 | 2754  | USDA-FSIS; S | North Americ | USA         | FSIS11812592 |      |
| 6480  | 26    | USDA-FSIS; S | North Americ | USA         | FSIS11812063 |      |
| 11803 | 4188  | USDA-FSIS; S | North Americ | USA         | FSIS11811270 |      |
| 17865 | 4272  | USDA-FSIS; S | North Americ | USA         | FSIS1607146  |      |
| 16220 | 5421  | USDA-FSIS; S | North Americ | USA         | FSIS1701497  |      |
| 12149 | 4188  | USDA-FSIS; S | North Americ | USA         | FSIS11918239 |      |
| 12262 | 2754  | USDA-FSIS; S | North Americ | USA         | FSIS11917669 |      |
| 20787 | 6667  |              | North Americ | Canada      | RM3405       |      |
| 21416 | 26    |              | Europe       | Luxembourg  | LNS9143194   |      |
|       |       |              | Asia         | Japan       | 1753         |      |
| 10420 | 26    |              | Europe       | Portugal    | Cj-4207      |      |
| 21681 | 7034  |              | Asia         | South Korea | CS41         |      |
| 21731 | 7057  |              | North Americ | Canada      | R1S3-12      |      |
| 21731 | 7057  |              | North Americ | Canada      | R1S3-W2A     |      |
| 27885 | 26    | rMLST=Exclud | Europe       | France      | bigsid_8896  |      |
| 37115 | 12956 |              | Europe       | Italy       | RM5146       | HS:8 |
| 37116 | 26    |              | Europe       | Italy       | RM5148       | HS:8 |
| 37117 | 12957 |              | Europe       | Italy       | RM5149       | HS:1 |
| 37118 | 12958 |              | Europe       | Italy       | RM5156       | HS:1 |

| region      | source                | town or city | year |
|-------------|-----------------------|--------------|------|
| Oxfordshire | human stool           |              | 2004 |
| Oxfordshire | human stool           |              | 2012 |
| Oxfordshire | human stool           |              | 2014 |
| Oxfordshire | human stool           |              | 2015 |
|             | other animal          |              | 2011 |
|             | cattle                | Aberdeen     | 2013 |
|             | turkey                | Aberdeen     | 2013 |
|             | chicken               | Aberdeen     | 2011 |
|             | human stool           | Aberdeen     | 2015 |
|             | chicken               | Madrid       | 2010 |
|             | human stool           | Aberdeen     | 2016 |
|             | chicken               | Aberdeen     | 2016 |
|             | wild bird             |              |      |
|             | chicken               |              | 2009 |
|             | human unspecified     |              | 1980 |
|             | lamb offal or meat    |              | 2017 |
| PA          | cattle                |              | 2016 |
|             | chicken               |              |      |
| Newcastle/N | human stool           |              | 2017 |
| Hawke's Bay | human stool           |              | 2016 |
| Hawke's Bay | human stool           |              | 2016 |
|             | beef offal or meat    |              | 2018 |
|             | human stool           |              | 2002 |
| Newcastle/N | human stool           |              | 2018 |
|             | chicken offal or meat |              | 2018 |
|             | human stool           |              | 1997 |
|             | chicken offal or meat |              | 2016 |
| PA          | human unspecified     |              | 2018 |
| WA          | chicken               |              | 2017 |
| IL          | chicken offal or meat |              | 2017 |
| WI          | chicken offal or meat |              | 2016 |
| TX          | chicken offal or meat |              | 2017 |
| SC          | chicken offal or meat |              | 2017 |
| GA          | chicken offal or meat |              | 2016 |
| AL          | chicken offal or meat |              | 2016 |
| FL          | chicken               |              | 2016 |
| GA          | chicken               |              | 2016 |
| GA          | chicken offal or meat |              | 2017 |

|               |                       |      |
|---------------|-----------------------|------|
| FL            | chicken               | 2017 |
| IN            | chicken offal or meat | 2017 |
| LA            | chicken               | 2017 |
| AL            | chicken offal or meat | 2017 |
| KS            | cattle                | 2018 |
| DE            | chicken               | 2018 |
| SC            | chicken               | 2018 |
| NE            | cattle                | 2016 |
| MD            | cattle                | 2017 |
| KS            | pig                   | 2019 |
| MO            | pig                   | 2019 |
|               | human stool           | 2021 |
|               | chicken offal or meat | 2020 |
|               | human stool           | 2021 |
|               | chicken               | 2017 |
| British Colum | broiler environment   | 2020 |
| British Colum | chicken offal or meat | 2020 |
|               | human stool           | 2016 |
|               | turkey                |      |
|               | turkey                |      |
|               | chicken               |      |
|               | human unspecified     |      |

Table S5. *Campylobacter jejuni* ST-50 strains from North America and Europe from PubMLST to create Figure 2. Neighbor-joining dendrogram.

| PubMLST<br>ID | strain       | continent     | country | region                   | source    |
|---------------|--------------|---------------|---------|--------------------------|-----------|
| 6310          | OXC453       | Europe        | UK      | Oxfordshire              | human     |
| 22255         | OXC7071      | Europe        | UK      | Oxfordshire              | human     |
| 30569         | OXC8885      | Europe        | UK      | Oxfordshire              | human     |
| 32893         | OXC9837      | Europe        | UK      | Oxfordshire              | human     |
| 37570         | Seal183      | Europe        | UK      |                          | seal      |
| 39737         | B0050        | Europe        | UK      |                          | cattle    |
| 40513         | C0788        | Europe        | UK      |                          | turkey    |
| 43339         | C0261        | Europe        | UK      |                          | chicken   |
| 48402         | ARI4066      | Europe        | UK      |                          | human     |
| 51553         | 11_S10       | Europe        | Spain   |                          | chicken   |
| 56445         | ARI4473      | Europe        | UK      |                          | human     |
| 56604         | C1585        | Europe        | UK      |                          | chicken   |
| 57531         | BCW_6872     | North America | USA     | CA                       | wild bird |
| 57783         | chick50      | Europe        | UK      |                          | chicken   |
| 60600         | RM3412       | North America | Canada  |                          | human     |
| 61660         | FDI295       | Europe        | UK      |                          | lamb      |
| 62031         | FSIS1606748  | North America | USA     | PA                       | cattle    |
| 62368         | AC0745       | Europe        | France  |                          | chicken   |
| 62797         | NWC1796      | Europe        | UK      | Newcastle/North Tyneside | human     |
| 69767         | 16CC0850     | Oceania       | NZ      | Hawke's Bay              | human     |
| 69781         | 16CC0947     | Oceania       | NZ      | Hawke's Bay              | human     |
| 70110         | FDI452       | Europe        | UK      |                          | beef      |
| 70943         | Po_1         | Europe        | Finland |                          | human     |
| 76581         | NWC2398      | Europe        | UK      | Newcastle/North Tyneside | human     |
| 76902         | FDI580       | Europe        | UK      |                          | chicken   |
| 77678         | PHEHIST096   | Europe        | UK      |                          | human     |
| 79837         | RL16000343   | Europe        | UK      |                          | chicken   |
| 80734         | PS00309      | North America | USA     | PA                       | human     |
| 83558         | 2016D-0258   | North America | USA     |                          | human     |
| 84435         | 2016D-0064   | North America | USA     |                          | human     |
| 92074         | FSIS1701236  | North America | USA     | WA                       | chicken   |
| 92223         | FSIS1710996  | North America | USA     | IL                       | chicken   |
| 92532         | FSIS1607853  | North America | USA     | WI                       | chicken   |
| 92583         | FSIS1702913  | North America | USA     | TX                       | chicken   |
| 92597         | FSIS21820901 | North America | USA     | SC                       | chicken   |
| 92750         | FSIS1609374  | North America | USA     | GA                       | chicken   |
| 92951         | FSIS1709833  | North America | USA     | AL                       | chicken   |
| 92959         | FSIS1609357  | North America | USA     | FL                       | chicken   |
| 93123         | FSIS1608758  | North America | USA     | GA                       | chicken   |

|        |              |               |           |                  |                 |
|--------|--------------|---------------|-----------|------------------|-----------------|
| 93493  | FSIS21720686 | North America | USA       | GA               | chicken         |
| 93623  | FSIS1710700  | North America | USA       | FL               | chicken         |
| 93697  | FSIS1703025  | North America | USA       | IN               | chicken         |
| 93736  | FSIS11705500 | North America | USA       | LA               | chicken         |
| 93773  | FSIS21720655 | North America | USA       | AL               | chicken         |
| 98915  | FSIS11812592 | North America | USA       | KS               | cattle          |
| 98987  | FSIS11812063 | North America | USA       | DE               | chicken         |
| 99148  | FSIS11811270 | North America | USA       | SC               | chicken         |
| 99443  | FSIS1607146  | North America | USA       | NE               | cattle          |
| 103252 | FSIS1701497  | North America | USA       | MD               | cattle          |
| 104567 | FSIS11918239 | North America | USA       | KS               | pig             |
| 104732 | FSIS11917669 | North America | USA       | MO               | pig             |
| 106388 | RM3405       | North America | Canada    |                  | human           |
| 110094 | LNS9143194   | Europe        | Luxembrg. |                  | human           |
| 110642 | 1753         | Asia          | Japan     |                  | chicken         |
| 111135 | Cj-4207      | Europe        | Portugal  |                  | human           |
| 111508 | CS41         | Asia          | S. Korea  |                  | chicken         |
| 111713 | R1S3-12      | North America | Canada    | British Columbia | broiler enviro. |
| 111728 | R1S3-W2A     | North America | Canada    | British Columbia | chicken         |
| 114671 | bigsid_8896  | Europe        | France    |                  | human           |
| 116314 | RM5146       | Europe        | Italy     |                  | turkey          |
| 116315 | RM5148       | Europe        | Italy     |                  | turkey          |
| 116316 | RM5149       | Europe        | Italy     |                  | chicken         |
| 116317 | RM5156       | Europe        | Italy     |                  | human           |

---



used

---

| <u>year</u> |
|-------------|
| 2004        |
| 2012        |
| 2014        |
| 2015        |
| 2011        |
| 2013        |
| 2013        |
| 2011        |
| 2015        |
| 2010        |
| 2016        |
| 2016        |
| unk         |
| 2009        |
| 1979        |
| 2017        |
| 2016        |
| unk         |
| 2017        |
| 2016        |
| 2016        |
| 2018        |
| 2002        |
| 2018        |
| 2018        |
| 1997        |
| 2016        |
| 2018        |
| 2016        |
| 2016        |
| 2017        |
| 2017        |
| 2016        |
| 2017        |
| 2017        |
| 2016        |
| 2016        |
| 2016        |
| 2016        |

2017  
2017  
2017  
2017  
2017  
2018  
2018  
2018  
2016  
2017  
2019  
2019  
1980  
2021  
2020  
2021  
2017  
2020  
2020  
2016  
unk  
unk  
unk  
unk
