# Supplementary material for: Genomic Analysis Points to Multiple Genetic Mechanisms for Non-Transformable Campylobacter jejuni ST-50
Source: MDPI journal article supplement (doi:10.3390/microorganisms12020327), 2024-02-04
Supplement: s1 [file s1]

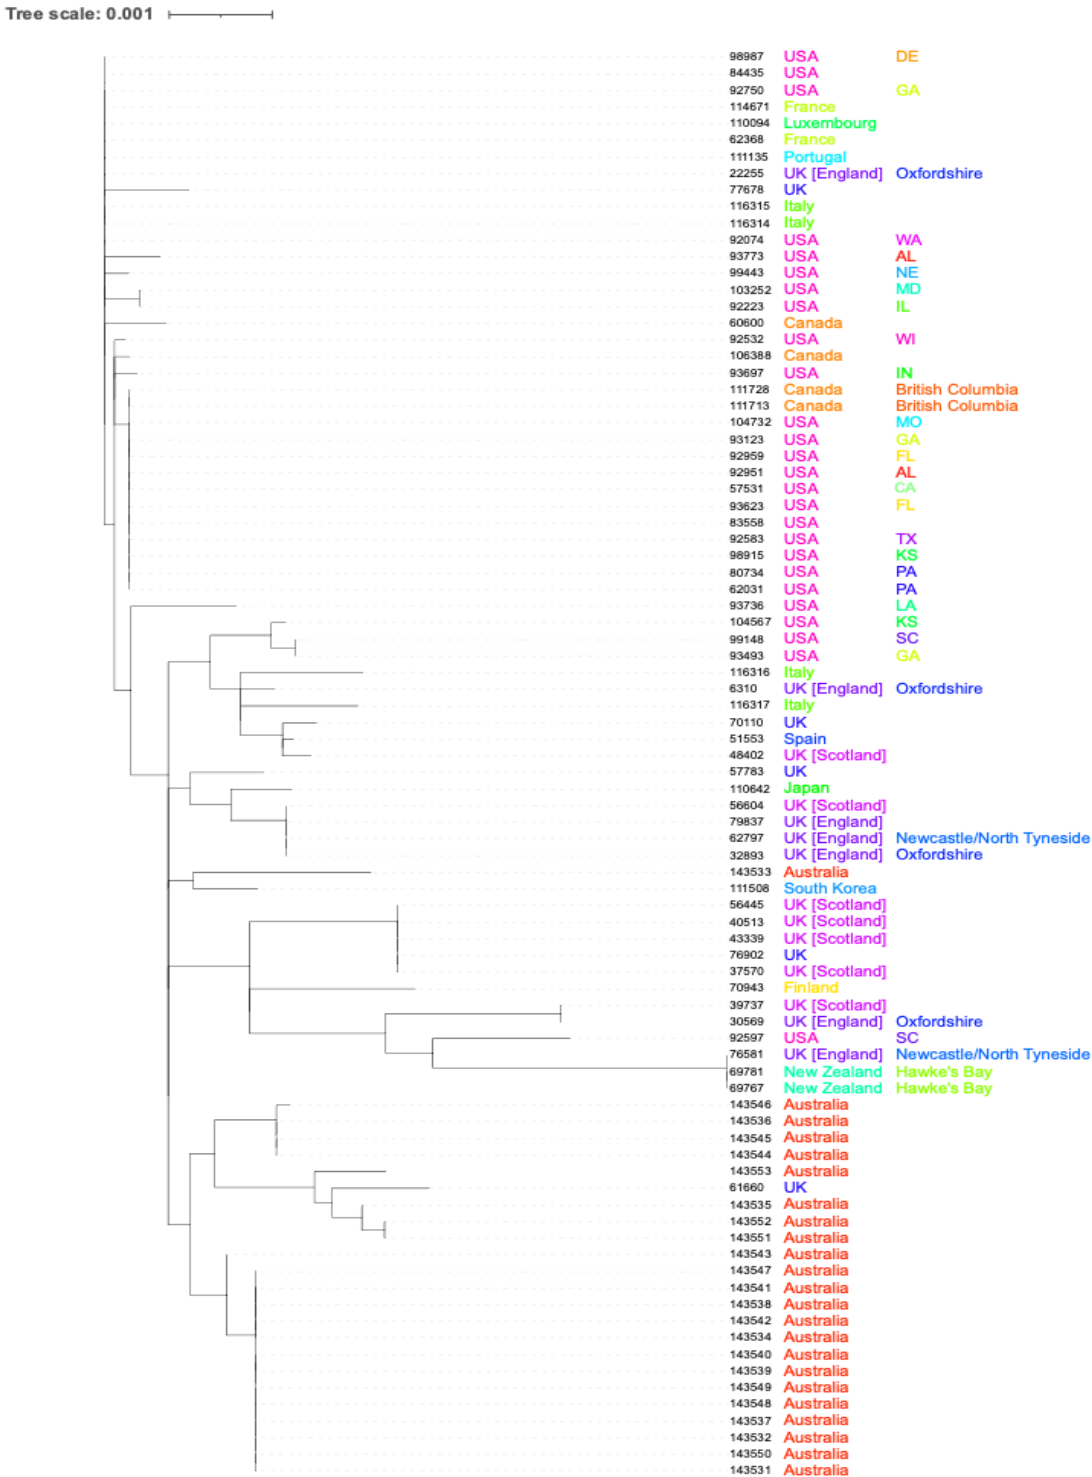

**Figure S1. Neighbor-joining dendrogram of *C. jejuni* ST-50 strains from multiple countries including United States and Australia.** This neighbor-joining dendrogram was created using the Interactive Tree of Life (iTOL) plugin within PubMLST using the concatenated nucleotide sequences of the *C. jejuni*/*C. coli* cgMLSTv2 dataset shared by the strains. The genomic data includes the genomic sequences from 63 *C. jejuni* ST-50 strains used for Figure 2 and 23 *C. jejuni* ST-50 strains from Australia [28]. Metadata at tree leaves show PubMLST id, country of origin, and region within country if provided.
