# Supplementary material for: Genomic Analysis Points to Multiple Genetic Mechanisms for Non-Transformable Campylobacter jejuni ST-50
Source: MDPI journal article supplement (doi:10.3390/microorganisms12020327), 2024-02-04
Supplement: s1 [file s1]

Table S4. *Campylobacter jejuni* ST-8 strains from North America from PubMLST.

| PubMLST<br>id | Isolate     | country | <i>dns2 or</i>          |                       |                         |
|---------------|-------------|---------|-------------------------|-----------------------|-------------------------|
|               |             |         | <i>dns</i> <sup>1</sup> | <i>3</i> <sup>2</sup> | <i>cts</i> <sup>3</sup> |
| 1793          | D2643       | USA     | N                       | N                     | wt                      |
| 1795          | D2641       | USA     | N                       | N                     | wt                      |
| 1796          | D2651       | USA     | N                       | N                     | wt                      |
| 1797          | D2763       | USA     | Y                       | N                     | E                       |
| 1798          | D2770       | USA     | Y                       | N                     | E                       |
| 1799          | D2769       | USA     | Y                       | N                     | E                       |
| 5293          | IA3902      | USA     | N                       | N                     | wt                      |
| 34104         | 01-1512     | Canada  | Y                       | Y                     | wt                      |
| 34105         | 00-0949     | Canada  | Y                       | N                     | wt                      |
| 57181         | BCW_6920    | USA     | N                       | N                     | wt                      |
| 57182         | BCW_6921    | USA     | N                       | N                     | wt                      |
| 57183         | BCW_6922    | USA     | N                       | N                     | wt                      |
| 57184         | BCW_6924    | USA     | N                       | N                     | D                       |
| 57185         | BCW_6925    | USA     | N                       | N                     | wt                      |
| 57186         | BCW_6926    | USA     | N                       | N                     | D                       |
| 57187         | BCW_6927    | USA     | N                       | N                     | wt                      |
| 57188         | BCW_6928    | USA     | N                       | N                     | wt                      |
| 57190         | BCW_6930    | USA     | N                       | N                     | wt                      |
| 57191         | BCW_6931    | USA     | N                       | N                     | wt                      |
| 57192         | BCW_6932    | USA     | N                       | N                     | wt                      |
| 57193         | BCW_6933    | USA     | N                       | N                     | wt                      |
| 57194         | BCW_6934    | USA     | N                       | N                     | wt                      |
| 60558         | W14         | Canada  | N                       | N                     | nd                      |
| 60559         | W15         | Canada  | N                       | N                     | wt                      |
| 60561         | W17         | Canada  | N                       | N                     | nd                      |
| 60610         | RM8893      | USA     | N                       | Y                     | wt                      |
| 60969         | F15M01918   | USA     | N                       | Y                     | E                       |
| 60970         | F15M01909   | USA     | N                       | Y                     | E                       |
| 60971         | F15M01873-C | USA     | N                       | Y                     | E                       |
| 60972         | F15M01873-B | USA     | N                       | Y                     | E                       |
| 60973         | F15M01873-A | USA     | N                       | Y                     | E                       |
| 60974         | F15M01862-D | USA     | N                       | Y                     | E                       |
| 60975         | F15M01862-C | USA     | N                       | Y                     | E                       |
| 60976         | F15M01862-B | USA     | N                       | Y                     | E                       |
| 60977         | F15M01862-A | USA     | N                       | Y                     | E                       |
| 60989         | F15M00600   | USA     | N                       | N                     | wt                      |
| 61917         | FSIS1702389 | USA     | N                       | N                     | wt                      |
| 61932         | FSIS1605807 | USA     | N                       | N                     | wt                      |
| 61933         | FSIS1710268 | USA     | N                       | N                     | wt                      |
| 61934         | FSIS1710481 | USA     | N                       | N                     | wt                      |
| 61935         | FSIS1702877 | USA     | N                       | N                     | wt                      |
| 61936         | FSIS1501426 | USA     | N                       | N                     | wt                      |
| 61950         | FSIS1504073 | USA     | N                       | N                     | nd                      |

|       |                |     |   |   |    |
|-------|----------------|-----|---|---|----|
| 61971 | FSIS1501093    | USA | N | N | wt |
| 61984 | FSIS1606853    | USA | N | N | nd |
| 61987 | FSIS1607071    | USA | N | N | nd |
| 62012 | FSIS1608586    | USA | N | N | nd |
| 70322 | 2004392        | USA | N | N | wt |
| 70323 | 2010D-8347     | USA | N | N | wt |
| 70324 | 2014D-0067     | USA | N | N | wt |
| 70325 | 2014D-0068     | USA | N | N | wt |
| 70326 | 2014D-0070     | USA | N | N | wt |
| 70327 | D4823          | USA | N | Y | wt |
| 70328 | 20060911       | USA | N | N | wt |
| 70329 | 2014D-0187     | USA | N | N | wt |
| 70330 | 2014D-0056     | USA | N | N | wt |
| 70331 | 2014D-0175     | USA | N | N | wt |
| 70332 | 2014D-0184     | USA | N | N | wt |
| 70333 | D6249          | USA | N | N | wt |
| 70334 | 2014D-0189     | USA | N | N | wt |
| 70335 | PNUSAC000138   | USA | N | N | wt |
| 70336 | PNUSAC000139   | USA | N | N | wt |
| 70337 | PNUSAC000140   | USA | N | N | wt |
| 70338 | PNUSAC000145   | USA | N | N | nd |
| 70339 | PNUSAC000144   | USA | N | N | wt |
| 70340 | PNUSAC000196   | USA | N | Y | wt |
| 70341 | 2014D-0071     | USA | N | N | wt |
| 70342 | 2015D-0043     | USA | N | N | wt |
| 78545 | SKS6846_26_S18 | USA | N | N | wt |
| 78570 | SKS6873_53_S57 | USA | N | N | wt |
| 79215 | PS00239        | USA | N | N | nd |
| 81083 | PNUSAC009408   | USA | N | N | wt |
| 81136 | PNUSAC009369   | USA | N | N | wt |
| 81201 | PNUSAC006157   | USA | N | N | wt |
| 81248 | PNUSAC005921   | USA | N | Y | wt |
| 81369 | PNUSAC005782   | USA | N | N | nd |
| 81380 | PNUSAC005725   | USA | N | N | wt |
| 81520 | PNUSAC005641   | USA | N | N | wt |
| 81547 | PNUSAC005589   | USA | N | N | wt |
| 81549 | PNUSAC005587   | USA | N | Y | wt |
| 81559 | PNUSAC005513   | USA | N | N | wt |
| 81577 | PNUSAC005506   | USA | N | N | wt |
| 81581 | PNUSAC004292   | USA | N | Y | wt |
| 81585 | PNUSAC005584   | USA | N | N | wt |
| 81617 | PNUSAC005466   | USA | N | Y | wt |
| 81624 | PNUSAC005470   | USA | Y | Y | wt |
| 81628 | PNUSAC005671   | USA | N | N | wt |
| 81682 | PNUSAC005432   | USA | N | N | wt |
| 81690 | PNUSAC005410   | USA | N | N | wt |
| 81725 | PNUSAC005414   | USA | N | N | nd |

|       |                    |     |   |   |    |
|-------|--------------------|-----|---|---|----|
| 81742 | PNUSAC005336       | USA | N | N | wt |
| 81785 | PNUSAC005498       | USA | N | Y | wt |
| 81792 | PNUSAC005480       | USA | N | N | wt |
| 81795 | PNUSAC005477       | USA | N | N | wt |
| 81842 | PNUSAC005394       | USA | N | N | wt |
| 81907 | PNUSAC005365       | USA | N | N | wt |
| 81917 | PNUSAC005320       | USA | N | N | wt |
| 81951 | PNUSAC005299       | USA | N | N | wt |
| 82012 | PNUSAC005110       | USA | N | N | wt |
| 82080 | PNUSAC005258       | USA | N | N | wt |
| 82085 | PNUSAC005201       | USA | N | N | wt |
| 82131 | PNUSAC005075       | USA | N | N | wt |
| 82135 | PNUSAC005062       | USA | N | N | wt |
| 82250 | PNUSAC004961       | USA | N | N | F  |
| 82251 | PNUSAC004725       | USA | N | N | wt |
| 82308 | PNUSAC000080       | USA | N | N | wt |
| 82312 | PNUSAC000079       | USA | N | N | wt |
| 82316 | PNUSAC004917       | USA | N | N | wt |
| 82345 | PNUSAC004904       | USA | N | N | wt |
| 82371 | PNUSAC004839       | USA | N | Y | nd |
| 82372 | PNUSAC004837       | USA | N | N | wt |
| 82389 | PNUSAC004851       | USA | N | Y | wt |
| 82395 | PNUSAC004846       | USA | N | N | nd |
| 82425 | PNUSAC004815       | USA | N | Y | wt |
| 82432 | PNUSAC004800       | USA | N | Y | wt |
| 82440 | PNUSAC004803       | USA | N | Y | wt |
| 82451 | PNUSAC004763       | USA | N | Y | wt |
| 82454 | PNUSAC004855       | USA | N | N | wt |
| 82465 | PNUSAC004796       | USA | N | Y | wt |
| 82477 | PNUSAC004797       | USA | N | Y | wt |
| 82483 | PNUSAC004670       | USA | N | N | wt |
| 82494 | PNUSAC004736       | USA | N | Y | wt |
| 82608 | D4808              | USA | N | N | wt |
| 82636 | TESTWGCAMPY0003969 | USA | N | N | wt |
| 82644 | TESTWGCAMPY0003785 | USA | N | N | wt |
| 82659 | PNUSAC000649       | USA | N | N | wt |
| 82677 | PNUSAC000149       | USA | N | N | wt |
| 82741 | PNUSAC002005       | USA | N | N | wt |
| 82744 | PNUSAC002009       | USA | N | N | wt |
| 82752 | PNUSAC001749       | USA | N | N | wt |
| 82762 | PNUSAC001126       | USA | N | N | E  |
| 82766 | PNUSAC001125       | USA | N | N | wt |
| 82799 | PNUSAC001818       | USA | N | Y | wt |
| 82816 | PNUSAC009233       | USA | N | N | nd |
| 82837 | PNUSAC001674       | USA | N | N | wt |
| 82903 | PNUSAC001666       | USA | N | Y | wt |
| 82906 | PNUSAC001731       | USA | N | N | wt |

|       |                    |         |   |   |    |
|-------|--------------------|---------|---|---|----|
| 82916 | PNUSAC001543       | USA     | N | N | wt |
| 82917 | PNUSAC001498       | Unknown | N | N | wt |
| 82961 | PNUSAC000916       | USA     | N | N | nd |
| 82981 | PNUSAC000489       | USA     | N | N | wt |
| 82982 | PNUSAC000602       | USA     | N | N | wt |
| 82986 | PNUSAC000536       | USA     | N | N | wt |
| 83027 | PNUSAC000914       | USA     | N | N | nd |
| 83028 | PNUSAC000920       | USA     | N | N | wt |
| 83033 | TESTWGCAMPY0003839 | USA     | N | N | wt |
| 83037 | TESTWGCAMPY0004093 | USA     | N | N | wt |
| 83140 | PNUSAC008839       | USA     | N | Y | nd |
| 83156 | PNUSAC002972       | USA     | N | Y | wt |
| 83187 | PNUSAC003696       | USA     | N | N | wt |
| 83205 | PNUSAC001964       | USA     | N | N | wt |
| 83266 | PNUSAC002892       | USA     | N | N | wt |
| 83472 | PNUSAC001541       | USA     | N | N | wt |
| 83476 | PNUSAC002631       | USA     | N | N | wt |
| 83578 | PNUSAC001961       | USA     | N | N | wt |
| 83582 | PNUSAC004129       | USA     | N | N | nd |
| 83593 | PNUSAC002901       | USA     | N | N | wt |
| 83631 | PNUSAC003634       | USA     | N | N | wt |
| 83700 | PNUSAC003478       | USA     | N | N | wt |
| 83703 | PNUSAC003480       | USA     | N | N | wt |
| 83801 | PNUSAC001647       | USA     | N | N | wt |
| 83817 | PNUSAC001732       | USA     | N | N | wt |
| 83821 | PNUSAC000911       | USA     | N | N | wt |
| 83877 | PNUSAC001733       | USA     | N | N | wt |
| 83903 | PNUSAC004383       | USA     | N | N | wt |
| 83913 | PNUSAC004508       | USA     | N | Y | wt |
| 83915 | PNUSAC004359       | USA     | N | N | wt |
| 83927 | PNUSAC003968       | USA     | N | Y | nd |
| 84084 | PNUSAC000745       | USA     | N | Y | wt |
| 84109 | PNUSAC003390       | USA     | N | N | E  |
| 84167 | PNUSAC000900       | Unknown | N | N | wt |
| 84249 | PNUSAC003139       | USA     | N | N | wt |
| 84343 | PNUSAC000657       | Unknown | N | N | wt |
| 84363 | PNUSAC000624       | USA     | N | Y | wt |
| 84365 | PNUSAC000625       | USA     | N | Y | wt |
| 84377 | PNUSAC000411       | USA     | N | Y | F  |
| 84497 | TESTWGCAMPY0003838 | USA     | N | N | wt |
| 84502 | TESTWGCAMPY0003783 | USA     | N | N | wt |
| 84531 | PNUSAC000256       | USA     | N | N | wt |
| 84544 | TESTWGCAMPY1000253 | USA     | N | N | wt |
| 84549 | TESTWGCAMPY0002162 | USA     | N | N | wt |
| 84550 | PNUSAC000171       | USA     | N | N | wt |
| 84575 | TESTWGCAMPY0001792 | USA     | N | N | wt |
| 84620 | TESTWGCAMPY1000253 | USA     | N | N | wt |

|       |                     |         |   |   |    |
|-------|---------------------|---------|---|---|----|
| 84636 | PNUSAC000150        | USA     | N | N | wt |
| 84642 | TESTWGCAMPY0001711  | USA     | N | N | wt |
| 84644 | TESTWGCAMPY0001708  | USA     | N | N | wt |
| 84674 | TESTWGCAMPY0002208  | USA     | N | Y | wt |
| 84675 | TESTWGCAMPY0002174  | USA     | Y | N | wt |
| 84677 | PNUSAC000142        | USA     | N | N | wt |
| 84702 | PNUSAC000060        | USA     | N | N | wt |
| 84747 | PNUSAC007759        | USA     | N | Y | wt |
| 84774 | PNUSAC001412        | USA     | N | N | wt |
| 84808 | PNUSAC008854        | USA     | N | N | wt |
| 84872 | PNUSAC001706        | USA     | N | N | wt |
| 84876 | PNUSAC001734        | USA     | N | N | wt |
| 84899 | 2016D-0216          | USA     | N | N | nd |
| 84942 | PNUSAC001052        | USA     | N | N | wt |
| 84984 | PNUSAC000934        | Unknown | N | N | nd |
| 84995 | PNUSAC000924        | USA     | N | Y | wt |
| 84996 | PNUSAC000925        | USA     | N | Y | wt |
| 85010 | PNUSAC000917        | USA     | N | N | nd |
| 85011 | PNUSAC000915        | USA     | N | N | wt |
| 85013 | PNUSAC000912        | USA     | N | N | nd |
| 85044 | PNUSAC000361        | USA     | N | Y | wt |
| 85045 | PNUSAC000366        | USA     | N | Y | wt |
| 85049 | PNUSAC000369        | USA     | N | Y | wt |
| 85081 | PNUSAC000665        | USA     | N | N | wt |
| 85213 | PNUSAC000534        | Unknown | N | N | wt |
| 85232 | PNUSAC000446        | USA     | N | N | wt |
| 85269 | PNUSAC000419        | USA     | N | Y | wt |
| 85307 | TESTWGCAMPY10002664 | USA     | N | N | wt |
| 85324 | TESTWGCAMPY0002250  | USA     | N | N | wt |
| 85326 | TESTWGCAMPY10002528 | USA     | N | N | wt |
| 85367 | TESTWGCAMPY0002164  | USA     | N | N | wt |
| 85382 | TESTWGCAMPY0001541  | USA     | N | N | wt |
| 85404 | PNUSAC000042        | USA     | N | N | wt |
| 85407 | PNUSAC000012        | USA     | N | Y | wt |
| 85410 | TESTWGCAMPY0002404  | USA     | N | N | wt |
| 85448 | PNUSAC008992        | USA     | N | N | nd |
| 85534 | PNUSAC000147        | USA     | N | N | wt |
| 85575 | PNUSAC004492        | USA     | N | N | nd |
| 85587 | PNUSAC004459        | USA     | N | N | wt |
| 85595 | PNUSAC004293        | USA     | N | N | nd |
| 85599 | PNUSAC004205        | USA     | N | Y | E  |
| 85634 | PNUSAC004405        | USA     | N | N | nd |
| 85643 | PNUSAC004099        | USA     | Y | Y | wt |
| 85648 | PNUSAC003934        | USA     | N | Y | wt |
| 85666 | PNUSAC003933        | USA     | N | N | wt |
| 85689 | PNUSAC003970        | USA     | N | N | nd |
| 85709 | PNUSAC004493        | USA     | N | N | nd |

|       |              |         |   |   |    |
|-------|--------------|---------|---|---|----|
| 85810 | PNUSAC000792 | USA     | N | N | wt |
| 85833 | PNUSAC004015 | USA     | N | N | nd |
| 85841 | PNUSAC003469 | USA     | N | Y | wt |
| 85914 | PNUSAC003856 | USA     | N | Y | nd |
| 85928 | PNUSAC004209 | USA     | N | N | nd |
| 85998 | PNUSAC004248 | USA     | N | N | wt |
| 86053 | PNUSAC003925 | USA     | N | N | wt |
| 86110 | PNUSAC003424 | USA     | N | N | wt |
| 86114 | PNUSAC003419 | USA     | N | N | wt |
| 86200 | PNUSAC004043 | USA     | N | Y | wt |
| 86264 | PNUSAC000538 | USA     | N | Y | wt |
| 86287 | PNUSAC003705 | USA     | N | N | wt |
| 86294 | PNUSAC003591 | USA     | Y | N | wt |
| 86297 | PNUSAC000788 | USA     | N | N | nd |
| 86309 | PNUSAC003567 | USA     | N | N | nd |
| 86328 | PNUSAC000575 | USA     | N | N | wt |
| 86329 | PNUSAC003541 | USA     | N | N | wt |
| 86397 | PNUSAC002715 | USA     | N | Y | wt |
| 86501 | PNUSAC002482 | USA     | N | N | wt |
| 86510 | PNUSAC001912 | USA     | N | N | wt |
| 86567 | PNUSAC002378 | USA     | N | Y | wt |
| 86610 | PNUSAC001917 | USA     | N | N | wt |
| 86678 | PNUSAC002699 | USA     | N | N | wt |
| 86705 | PNUSAC002773 | USA     | Y | N | wt |
| 86733 | PNUSAC001542 | USA     | N | N | wt |
| 86843 | PNUSAC003739 | USA     | N | N | wt |
| 86858 | PNUSAC003719 | USA     | N | Y | wt |
| 87018 | PNUSAC003422 | USA     | N | N | wt |
| 87081 | PNUSAC000584 | USA     | N | N | wt |
| 87088 | PNUSAC000855 | USA     | N | N | wt |
| 87094 | PNUSAC000401 | USA     | N | Y | F  |
| 87117 | PNUSAC003211 | USA     | N | N | wt |
| 87123 | PNUSAC003164 | USA     | N | N | wt |
| 87125 | PNUSAC003161 | USA     | N | Y | wt |
| 87224 | PNUSAC002935 | USA     | N | N | wt |
| 87305 | PNUSAC002688 | USA     | N | N | wt |
| 87317 | PNUSAC002635 | USA     | N | N | wt |
| 87322 | PNUSAC002617 | USA     | N | N | wt |
| 87430 | PNUSAC002476 | USA     | N | N | wt |
| 87529 | PNUSAC002226 | USA     | N | N | wt |
| 87593 | PNUSAC001911 | USA     | N | N | wt |
| 87597 | PNUSAC001952 | USA     | N | N | wt |
| 87654 | PNUSAC001713 | USA     | N | N | nd |
| 87660 | PNUSAC001554 | USA     | N | Y | F  |
| 87675 | PNUSAC001497 | Unknown | N | N | wt |
| 87695 | PNUSAC001544 | USA     | N | N | wt |
| 87749 | PNUSAC001065 | USA     | N | N | wt |

|       |                    |     |   |   |    |
|-------|--------------------|-----|---|---|----|
| 87764 | PNUSAC000957       | USA | N | N | nd |
| 87766 | PNUSAC000953       | USA | N | N | wt |
| 87773 | PNUSAC000918       | USA | N | N | nd |
| 87774 | PNUSAC000913       | USA | N | N | nd |
| 87821 | PNUSAC000650       | USA | N | N | wt |
| 87829 | PNUSAC000634       | USA | N | N | wt |
| 87837 | PNUSAC000628       | USA | N | Y | wt |
| 87861 | PNUSAC000553       | USA | N | N | wt |
| 87863 | PNUSAC000405       | USA | N | Y | F  |
| 87886 | PNUSAC000418       | USA | N | Y | wt |
| 87903 | PNUSAC000629       | USA | N | N | wt |
| 87963 | TESTWGCAMPY0003840 | USA | N | N | wt |
| 87985 | PNUSAC000225       | USA | N | N | nd |
| 88009 | PNUSAC000143       | USA | N | N | wt |
| 88011 | PNUSAC000141       | USA | N | N | wt |
| 88013 | PNUSAC000137       | USA | N | N | wt |
| 88031 | TESTWGCAMPY0001699 | USA | N | N | wt |
| 88041 | TESTWGCAMPY0002418 | USA | N | N | wt |
| 88060 | TESTWGCAMPY0002163 | USA | N | N | wt |
| 88068 | TESTWGCAMPY0001766 | USA | Y | N | E  |
| 88075 | TESTWGCAMPY0001767 | USA | Y | N | E  |
| 88112 | TESTWGCAMPY0001709 | USA | N | N | wt |
| 88187 | PNUSAC008873       | USA | N | Y | wt |
| 88207 | PNUSAC008819       | USA | N | N | wt |
| 88238 | PNUSAC008830       | USA | N | N | wt |
| 88241 | PNUSAC008825       | USA | N | N | wt |
| 88295 | PNUSAC008331       | USA | N | N | nd |
| 88299 | PNUSAC008182       | USA | N | N | wt |
| 88301 | PNUSAC008333       | USA | N | N | nd |
| 88307 | PNUSAC008181       | USA | N | N | nd |
| 88324 | PNUSAC008329       | USA | N | Y | nd |
| 88325 | PNUSAC008312       | USA | N | N | wt |
| 88330 | PNUSAC008332       | USA | N | N | nd |
| 88337 | PNUSAC008694       | USA | N | N | nd |
| 88348 | PNUSAC008311       | USA | N | N | wt |
| 88357 | PNUSAC008307       | USA | N | N | nd |
| 88360 | PNUSAC008310       | USA | N | N | wt |
| 88408 | PNUSAC008306       | USA | N | N | nd |
| 88414 | PNUSAC008308       | USA | N | N | nd |
| 88442 | PNUSAC007696       | USA | N | N | nd |
| 88445 | PNUSAC007697       | USA | N | N | wt |
| 88464 | PNUSAC007411       | USA | N | N | wt |
| 88479 | PNUSAC007355       | USA | Y | Y | wt |
| 88493 | PNUSAC007328       | USA | N | N | wt |
| 88528 | PNUSAC007258       | USA | N | N | wt |
| 88663 | PNUSAC006851       | USA | N | Y | wt |
| 88684 | PNUSAC006860       | USA | N | N | nd |

|       |              |     |   |   |    |
|-------|--------------|-----|---|---|----|
| 88715 | PNUSAC008516 | USA | N | Y | wt |
| 88808 | PNUSAC007850 | USA | N | N | wt |
| 88813 | PNUSAC007704 | USA | N | N | nd |
| 88820 | PNUSAC007883 | USA | N | N | wt |
| 88826 | 20110057     | USA | N | N | wt |
| 88843 | PNUSAC007884 | USA | N | N | wt |
| 89122 | PNUSAC008154 | USA | N | N | wt |
| 89184 | PNUSAC007522 | USA | N | N | nd |
| 89345 | PNUSAC007476 | USA | N | N | wt |
| 89388 | PNUSAC007882 | USA | N | N | wt |
| 89443 | PNUSAC007390 | USA | N | N | F  |
| 89498 | PNUSAC007706 | USA | N | N | nd |
| 89518 | PNUSAC007678 | USA | N | N | wt |
| 89551 | PNUSAC007351 | USA | Y | Y | wt |
| 89553 | PNUSAC007644 | USA | N | N | wt |
| 89584 | PNUSAC007354 | USA | Y | Y | wt |
| 89799 | PNUSAC007039 | USA | N | N | nd |
| 89896 | PNUSAC006768 | USA | N | N | wt |
| 89899 | PNUSAC004730 | USA | N | Y | wt |
| 90021 | PNUSAC006370 | USA | N | Y | wt |
| 90059 | PNUSAC006443 | USA | N | Y | wt |
| 90177 | PNUSAC006172 | USA | Y | Y | wt |
| 90192 | PNUSAC006057 | USA | N | N | wt |
| 90261 | PNUSAC006237 | USA | N | N | wt |
| 90336 | PNUSAC006896 | USA | N | N | wt |
| 90350 | PNUSAC006171 | USA | Y | N | wt |
| 90353 | PNUSAC006254 | USA | N | N | nd |
| 90473 | PNUSAC006697 | USA | N | Y | nd |
| 90525 | PNUSAC006604 | USA | N | Y | wt |
| 90552 | PNUSAC006639 | USA | N | N | wt |
| 90878 | FSIS11921295 | USA | N | N | wt |
| 91189 | FSIS31800973 | USA | N | N | wt |
| 91197 | FSIS11811797 | USA | N | Y | wt |
| 91694 | FSIS31800677 | USA | N | N | nd |
| 91945 | FSIS11810346 | USA | N | Y | wt |
| 92266 | FSIS1710818  | USA | N | N | wt |
| 92834 | FSIS1701579  | USA | N | N | wt |
| 93139 | FSIS1608397  | USA | N | N | wt |
| 93586 | FSIS1700402  | USA | N | N | wt |
| 93639 | FSIS1700904  | USA | N | N | wt |
| 93921 | FSIS1700405  | USA | N | N | wt |
| 93971 | FSIS1607781  | USA | N | N | wt |
| 96141 | CVM N17C393  | USA | Y | Y | wt |
| 96337 | CVM N17C392  | USA | N | Y | wt |
| 96732 | CVM N17C120  | USA | N | N | wt |
| 97318 | CVM N16C157  | USA | N | N | wt |
| 98036 | CVM N18C414  | USA | N | Y | nd |



|       |              |     |   |   |    |
|-------|--------------|-----|---|---|----|
| 98246 | CVM N18C145  | USA | N | Y | wt |
| 98454 | FSIS11921469 | USA | N | N | wt |
| 98479 | FSIS11921502 | USA | N | N | wt |
| 98507 | FSIS11921534 | USA | N | N | nd |
| 98509 | FSIS1606913  | USA | N | Y | wt |
| 98525 | FSIS11921271 | USA | N | N | nd |
| 98533 | FSIS11921269 | USA | N | N | wt |
| 98534 | FSIS11921261 | USA | N | Y | F  |
| 98535 | FSIS11921264 | USA | Y | N | wt |
| 98559 | FSIS11920894 | USA | N | N | wt |
| 98581 | FSIS11921065 | USA | Y | Y | nd |
| 98583 | FSIS11921060 | USA | Y | Y | wt |
| 98591 | FSIS11921105 | USA | Y | N | wt |
| 98597 | FSIS11921098 | USA | N | N | wt |
| 98601 | FSIS11921061 | USA | Y | Y | nd |
| 98627 | FSIS11921097 | USA | N | N | wt |
| 98676 | FSIS11920886 | USA | N | N | wt |
| 98677 | FSIS11920891 | USA | N | N | wt |
| 98703 | FSIS11813560 | USA | N | N | nd |
| 98727 | FSIS11813809 | USA | N | N | wt |
| 98763 | FSIS11813361 | USA | N | N | wt |
| 98775 | FSIS11813368 | USA | N | Y | nd |
| 98780 | FSIS11813379 | USA | N | Y | wt |
| 98785 | FSIS11813395 | USA | N | Y | wt |
| 98792 | FSIS11813179 | USA | N | N | nd |
| 98795 | FSIS11813172 | USA | N | Y | wt |
| 98851 | FSIS11810133 | USA | N | Y | wt |
| 98859 | FSIS11810986 | USA | N | Y | wt |
| 98862 | FSIS11810132 | USA | N | N | wt |
| 98863 | FSIS11811562 | USA | N | N | wt |
| 98874 | FSIS11705603 | USA | Y | N | nd |
| 98879 | FSIS11812625 | USA | N | N | nd |
| 98881 | FSIS11812620 | USA | N | N | wt |
| 98907 | FSIS11812596 | USA | N | N | wt |
| 98911 | FSIS11812588 | USA | N | N | wt |
| 98990 | FSIS11812058 | USA | N | N | E  |
| 98996 | FSIS11812057 | USA | N | N | E  |
| 99012 | FSIS11812059 | USA | N | Y | nd |
| 99065 | FSIS11811842 | USA | N | N | nd |
| 99086 | FSIS11811301 | USA | N | N | nd |
| 99098 | FSIS11811569 | USA | N | N | nd |
| 99111 | FSIS11810765 | USA | Y | N | nd |
| 99120 | FSIS11811275 | USA | Y | Y | wt |
| 99127 | FSIS11811010 | USA | N | N | F  |
| 99134 | FSIS11810995 | USA | N | N | wt |
| 99136 | FSIS11811013 | USA | N | Y | wt |
| 99138 | FSIS11811000 | USA | N | Y | nd |

|       |              |     |   |   |    |
|-------|--------------|-----|---|---|----|
| 99157 | FSIS11811283 | USA | N | N | wt |
| 99183 | FSIS11810786 | USA | N | N | nd |
| 99227 | FSIS11810415 | USA | N | N | wt |
| 99231 | FSIS11810778 | USA | N | N | nd |
| 99238 | FSIS11810403 | USA | N | N | nd |
| 99249 | FSIS11810385 | USA | N | N | nd |
| 99260 | FSIS11810412 | USA | Y | Y | wt |
| 99273 | FSIS11809049 | USA | N | N | wt |
| 99343 | FSIS11810115 | USA | N | N | wt |
| 99352 | FSIS11810143 | USA | N | N | wt |
| 99359 | FSIS11810150 | USA | N | N | wt |
| 99367 | FSIS11810138 | USA | N | N | nd |
| 99368 | FSIS11810147 | USA | N | N | wt |
| 99370 | FSIS11810149 | USA | N | N | wt |
| 99382 | FSIS1501987  | USA | N | N | wt |
| 99386 | FSIS1607148  | USA | N | Y | nd |
| 99393 | FSIS1607230  | USA | N | Y | nd |
| 99403 | FSIS1607227  | USA | N | N | nd |
| 99408 | FSIS1607092  | USA | N | N | wt |
| 99415 | FSIS1607152  | USA | N | Y | nd |
| 99417 | FSIS1607139  | USA | N | N | wt |
| 99425 | FSIS1607095  | USA | N | Y | wt |
| 99435 | FSIS1607089  | USA | N | Y | wt |
| 99444 | FSIS1607134  | USA | N | N | wt |
| 99484 | FSIS1606948  | USA | N | N | wt |
| 99500 | FSIS1606949  | USA | N | N | wt |
| 99507 | FSIS1606843  | USA | N | N | wt |
| 99512 | FSIS1606906  | USA | N | N | wt |
| 99519 | FSIS1606914  | USA | N | N | wt |
| 99545 | FSIS1606817  | USA | N | N | wt |
| 99546 | FSIS1606844  | USA | N | Y | F  |
| 99547 | FSIS1606856  | USA | N | Y | wt |
| 99561 | FSIS1606805  | USA | N | N | wt |
| 99582 | FSIS1606794  | USA | N | Y | wt |
| 99604 | FSIS1606460  | USA | N | Y | wt |
| 99606 | FSIS1606734  | USA | N | N | wt |
| 99615 | FSIS1606727  | USA | N | Y | wt |
| 99618 | FSIS1606720  | USA | Y | Y | nd |
| 99624 | FSIS1606662  | USA | N | N | wt |
| 99696 | FSIS1606588  | USA | N | N | wt |
| 99721 | FSIS1606356  | USA | N | N | wt |
| 99722 | FSIS1606358  | USA | N | N | wt |
| 99739 | FSIS1606386  | USA | N | N | nd |
| 99746 | FSIS1606381  | USA | N | Y | wt |
| 99749 | FSIS1606319  | USA | N | N | wt |
| 99775 | FSIS1606218  | USA | N | N | wt |
| 99824 | FSIS1606233  | USA | N | N | wt |

|        |              |     |   |   |    |
|--------|--------------|-----|---|---|----|
| 99826  | FSIS1606227  | USA | N | N | wt |
| 99832  | FSIS1605864  | USA | N | N | wt |
| 99833  | FSIS1605855  | USA | Y | Y | wt |
| 99852  | FSIS1606107  | USA | N | Y | nd |
| 99878  | FSIS1606100  | USA | N | N | E  |
| 99899  | FSIS1605988  | USA | N | N | wt |
| 99908  | FSIS1605876  | USA | N | Y | wt |
| 99911  | FSIS1605847  | USA | N | N | wt |
| 99914  | FSIS1605944  | USA | N | N | wt |
| 99919  | FSIS1606010  | USA | N | Y | wt |
| 99929  | FSIS1605935  | USA | N | N | wt |
| 99939  | FSIS1605880  | USA | N | Y | wt |
| 99959  | FSIS1605862  | USA | N | N | wt |
| 99972  | FSIS1605996  | USA | N | Y | F  |
| 99976  | FSIS1605924  | USA | N | Y | wt |
| 99978  | FSIS1605922  | USA | N | N | wt |
| 99986  | FSIS1605840  | USA | N | Y | wt |
| 99995  | FSIS1605727  | USA | N | N | nd |
| 100012 | FSIS1605777  | USA | Y | N | nd |
| 100039 | FSIS1605793  | USA | N | N | wt |
| 100067 | FSIS1605637  | USA | N | N | wt |
| 100096 | FSIS1605593  | USA | N | N | wt |
| 100100 | FSIS1605595  | USA | N | N | wt |
| 100108 | FSIS1700163  | USA | N | Y | wt |
| 100124 | FSIS1700137  | USA | Y | Y | F  |
| 100126 | FSIS1700118  | USA | N | Y | wt |
| 100138 | FSIS1711102  | USA | N | N | wt |
| 100149 | FSIS11920697 | USA | N | Y | nd |
| 100155 | FSIS11920705 | USA | N | N | wt |
| 100170 | FSIS11920687 | USA | N | N | wt |
| 100217 | FSIS1701645  | USA | N | N | wt |
| 100223 | FSIS1701646  | USA | N | N | nd |
| 100227 | FSIS1701654  | USA | N | N | wt |
| 100228 | FSIS1701641  | USA | N | N | wt |
| 100234 | FSIS1701507  | USA | Y | Y | F  |
| 100241 | FSIS1701515  | USA | N | N | wt |
| 100244 | FSIS1701506  | USA | Y | Y | F  |
| 100252 | FSIS1701503  | USA | N | N | nd |
| 100263 | FSIS11920440 | USA | N | N | nd |
| 100279 | FSIS11920454 | USA | N | N | nd |
| 100282 | FSIS11920458 | USA | N | Y | nd |
| 100312 | FSIS11920455 | USA | Y | N | wt |
| 100319 | FSIS1700327  | USA | N | N | wt |
| 100335 | FSIS1700305  | USA | N | N | wt |
| 100354 | FSIS1710455  | USA | N | N | wt |
| 100376 | FSIS1608467  | USA | N | N | nd |
| 100378 | FSIS1608593  | USA | N | N | wt |

|        |              |     |   |   |    |
|--------|--------------|-----|---|---|----|
| 100383 | FSIS1607944  | USA | N | N | wt |
| 100386 | FSIS1607954  | USA | N | N | wt |
| 100403 | FSIS1609478  | USA | Y | Y | nd |
| 100448 | FSIS11918631 | USA | N | N | wt |
| 100468 | FSIS11920219 | USA | Y | Y | F  |
| 100500 | FSIS1702074  | USA | N | Y | wt |
| 100542 | FSIS1711096  | USA | N | N | wt |
| 100544 | FSIS1702734  | USA | N | N | wt |
| 100551 | FSIS11920007 | USA | N | N | wt |
| 100564 | FSIS11808180 | USA | Y | Y | nd |
| 100606 | FSIS1710910  | USA | N | N | nd |
| 100632 | FSIS11919331 | USA | N | N | wt |
| 100635 | FSIS1702556  | USA | Y | N | wt |
| 100639 | FSIS11918843 | USA | N | N | nd |
| 100649 | FSIS1700964  | USA | N | Y | nd |
| 100665 | FSIS11919317 | USA | Y | Y | wt |
| 100735 | FSIS11807799 | USA | Y | N | wt |
| 100746 | FSIS11705793 | USA | N | N | wt |
| 100754 | FSIS11808183 | USA | N | N | wt |
| 100762 | FSIS11807986 | USA | Y | N | wt |
| 100763 | FSIS11809038 | USA | N | N | nd |
| 100803 | FSIS1609289  | USA | N | Y | wt |
| 100804 | FSIS1702399  | USA | N | Y | wt |
| 100814 | FSIS1700131  | USA | N | N | nd |
| 100816 | FSIS1711112  | USA | N | Y | wt |
| 100817 | FSIS11703895 | USA | N | N | nd |
| 100824 | FSIS1700976  | USA | N | N | wt |
| 100837 | FSIS1702549  | USA | N | N | wt |
| 100845 | FSIS11705227 | USA | N | Y | wt |
| 100848 | FSIS11705224 | USA | N | N | wt |
| 100858 | FSIS11706909 | USA | N | N | wt |
| 100860 | FSIS11807088 | USA | N | N | wt |
| 100872 | FSIS11705199 | USA | N | Y | nd |
| 100881 | FSIS11807177 | USA | N | N | nd |
| 100896 | FSIS11807833 | USA | N | N | F  |
| 100946 | FSIS11704504 | USA | N | N | wt |
| 100953 | FSIS11705763 | USA | N | N | wt |
| 100992 | FSIS11705921 | USA | N | Y | nd |
| 101005 | FSIS11807517 | USA | N | N | wt |
| 101008 | FSIS11809013 | USA | N | Y | F  |
| 101009 | FSIS11706468 | USA | N | N | wt |
| 101037 | FSIS11706215 | USA | N | N | wt |
| 101047 | FSIS11807040 | USA | N | N | wt |
| 101076 | FSIS1710622  | USA | N | N | wt |
| 101117 | FSIS1608609  | USA | Y | Y | 1  |
| 101146 | FSIS11705395 | USA | N | Y | wt |
| 101172 | FSIS11809823 | USA | N | N | wt |

|        |              |     |   |   |    |
|--------|--------------|-----|---|---|----|
| 101175 | FSIS11808751 | USA | Y | Y | wt |
| 101189 | FSIS11807502 | USA | Y | Y | F  |
| 101195 | FSIS11809337 | USA | N | Y | wt |
| 101196 | FSIS11807843 | USA | N | Y | nd |
| 101208 | FSIS11706255 | USA | N | N | wt |
| 101242 | FSIS11706261 | USA | N | N | wt |
| 101249 | FSIS11704327 | USA | N | N | wt |
| 101278 | FSIS11704011 | USA | N | N | E  |
| 101281 | FSIS1710625  | USA | N | N | wt |
| 101302 | FSIS1608618  | USA | N | Y | wt |
| 101341 | FSIS1710047  | USA | N | Y | wt |
| 101346 | FSIS1609788  | USA | N | Y | E  |
| 101349 | FSIS1609775  | USA | Y | Y | wt |
| 101360 | FSIS1608182  | USA | N | N | wt |
| 101366 | FSIS1609662  | USA | N | N | wt |
| 101387 | FSIS1607377  | USA | Y | Y | F  |
| 101403 | FSIS1701191  | USA | N | N | wt |
| 101423 | FSIS1703611  | USA | N | Y | nd |
| 101478 | FSIS1505093  | USA | N | N | wt |
| 101486 | FSIS1504900  | USA | N | Y | nd |
| 101499 | FSIS1501966  | USA | N | Y | nd |
| 101507 | FSIS1503662  | USA | N | N | wt |
| 101511 | FSIS1502068  | USA | N | N | wt |
| 101520 | FSIS1502092  | USA | Y | Y | wt |
| 101534 | FSIS1501962  | USA | N | N | wt |
| 101542 | FSIS1502924  | USA | N | N | wt |
| 101551 | FSIS1504648  | USA | Y | Y | wt |
| 101557 | FSIS1501338  | USA | N | Y | wt |
| 101564 | FSIS1501327  | USA | N | N | wt |
| 101567 | FSIS1501333  | USA | Y | N | wt |
| 101573 | FSIS1501798  | USA | N | N | wt |
| 101590 | FSIS11919802 | USA | Y | N | wt |
| 101614 | FSIS11919775 | USA | N | N | wt |
| 101635 | FSIS11918839 | USA | N | N | wt |
| 101642 | FSIS11918822 | USA | N | Y | wt |
| 101697 | FSIS1609784  | USA | Y | Y | wt |
| 101715 | FSIS11920241 | USA | N | Y | wt |
| 101742 | FSIS11920041 | USA | N | Y | nd |
| 101800 | FSIS1609136  | USA | N | N | wt |
| 101803 | FSIS1710153  | USA | N | N | wt |
| 101816 | FSIS1710601  | USA | N | N | wt |
| 101850 | FSIS1609278  | USA | N | Y | E  |
| 101853 | FSIS1609277  | USA | N | N | nd |
| 101876 | FSIS1608472  | USA | N | Y | wt |
| 101877 | FSIS1608607  | USA | N | N | wt |
| 101894 | FSIS1608461  | USA | N | N | wt |
| 101899 | FSIS1608178  | USA | N | N | wt |

|        |              |     |   |   |    |
|--------|--------------|-----|---|---|----|
| 101942 | FSIS1607435  | USA | N | N | wt |
| 101962 | FSIS1607365  | USA | N | N | wt |
| 101967 | FSIS1607315  | USA | N | Y | wt |
| 101969 | FSIS1607251  | USA | N | N | wt |
| 101976 | FSIS1504912  | USA | N | Y | wt |
| 102053 | FSIS1501976  | USA | N | Y | wt |
| 102079 | FSIS1504642  | USA | N | Y | wt |
| 102084 | FSIS1501974  | USA | N | N | wt |
| 102086 | FSIS1501983  | USA | N | N | wt |
| 102087 | FSIS1501343  | USA | N | N | wt |
| 102090 | FSIS11919770 | USA | N | Y | wt |
| 102116 | FSIS11919547 | USA | N | Y | wt |
| 102120 | FSIS11919558 | USA | N | N | nd |
| 102144 | FSIS11918596 | USA | N | N | wt |
| 102189 | FSIS11918830 | USA | N | N | F  |
| 102248 | FSIS11809507 | USA | N | Y | wt |
| 102252 | FSIS11809636 | USA | N | N | nd |
| 102253 | FSIS11809036 | USA | N | Y | wt |
| 102256 | FSIS11807667 | USA | N | N | wt |
| 102258 | FSIS11809508 | USA | N | Y | wt |
| 102260 | FSIS11809689 | USA | N | Y | wt |
| 102291 | FSIS11808209 | USA | N | Y | nd |
| 102313 | FSIS11809688 | USA | N | N | wt |
| 102314 | FSIS11808608 | USA | N | Y | nd |
| 102319 | FSIS11809833 | USA | N | N | wt |
| 102338 | FSIS11706599 | USA | N | Y | wt |
| 102341 | FSIS11809532 | USA | N | N | nd |
| 102344 | FSIS11807062 | USA | N | N | wt |
| 102367 | FSIS11809324 | USA | N | N | wt |
| 102380 | FSIS11809322 | USA | N | N | wt |
| 102383 | FSIS11808452 | USA | Y | Y | wt |
| 102386 | FSIS11808456 | USA | N | Y | wt |
| 102440 | FSIS11704505 | USA | N | N | nd |
| 102442 | FSIS11704487 | USA | N | Y | nd |
| 102448 | FSIS11704715 | USA | N | Y | nd |
| 102458 | FSIS11809830 | USA | N | N | wt |
| 102464 | FSIS11809346 | USA | N | Y | wt |
| 102469 | FSIS11809156 | USA | N | Y | wt |
| 102471 | FSIS11809042 | USA | N | Y | wt |
| 102504 | FSIS11809505 | USA | N | N | wt |
| 102509 | FSIS11809516 | USA | N | N | wt |
| 102542 | FSIS11705914 | USA | N | N | wt |
| 102548 | FSIS11706866 | USA | N | N | wt |
| 102556 | FSIS11809539 | USA | N | Y | wt |
| 102563 | FSIS11808197 | USA | N | Y | nd |
| 102584 | FSIS11705920 | USA | N | N | wt |
| 102664 | FSIS11705019 | USA | N | N | wt |

|        |              |     |   |   |    |
|--------|--------------|-----|---|---|----|
| 102667 | FSIS11809187 | USA | N | N | wt |
| 102668 | FSIS11809185 | USA | N | N | wt |
| 102672 | FSIS11808427 | USA | Y | Y | wt |
| 102677 | FSIS11807317 | USA | N | N | wt |
| 102720 | FSIS11808603 | USA | N | N | wt |
| 102743 | FSIS11809024 | USA | N | Y | nd |
| 102756 | FSIS11706917 | USA | N | N | wt |
| 102758 | FSIS11706426 | USA | N | N | nd |
| 102771 | FSIS11807176 | USA | N | N | nd |
| 102793 | FSIS11807093 | USA | N | N | nd |
| 102796 | FSIS11706911 | USA | N | Y | nd |
| 102798 | FSIS11807200 | USA | N | Y | wt |
| 102800 | FSIS11704535 | USA | N | Y | wt |
| 102822 | FSIS11706729 | USA | N | Y | wt |
| 102838 | FSIS11809847 | USA | N | N | nd |
| 102881 | FSIS11705404 | USA | Y | Y | nd |
| 102888 | FSIS11809008 | USA | N | Y | nd |
| 102893 | FSIS11808622 | USA | N | Y | wt |
| 102933 | FSIS11706882 | USA | N | Y | nd |
| 102956 | FSIS11807996 | USA | N | N | wt |
| 102963 | FSIS11808215 | USA | N | Y | nd |
| 102987 | FSIS11706440 | USA | N | N | wt |
| 103010 | FSIS11706427 | USA | N | N | wt |
| 103012 | FSIS11706900 | USA | N | N | nd |
| 103023 | FSIS11705802 | USA | N | Y | wt |
| 103038 | FSIS11704200 | USA | N | N | wt |
| 103041 | FSIS11704546 | USA | N | N | nd |
| 103050 | FSIS11704172 | USA | N | N | wt |
| 103063 | FSIS11705419 | USA | N | N | nd |
| 103113 | FSIS11703902 | USA | N | N | nd |
| 103157 | FSIS1702888  | USA | N | N | wt |
| 103189 | FSIS1700676  | USA | N | Y | wt |
| 103191 | FSIS1702095  | USA | N | N | wt |
| 103220 | FSIS1701488  | USA | N | N | wt |
| 103221 | FSIS1700638  | USA | N | N | wt |
| 103228 | FSIS1702260  | USA | N | N | wt |
| 103244 | FSIS1700154  | USA | N | N | wt |
| 103245 | FSIS1700124  | USA | Y | Y | F  |
| 103275 | FSIS1703441  | USA | N | N | nd |
| 103278 | FSIS1702875  | USA | Y | N | wt |
| 103285 | FSIS1710468  | USA | N | Y | wt |
| 103287 | FSIS1700990  | USA | N | N | wt |
| 103325 | FSIS1702560  | USA | N | N | wt |
| 103331 | FSIS1710458  | USA | N | N | wt |
| 103356 | FSIS11705017 | USA | N | N | nd |
| 103357 | FSIS11807846 | USA | N | Y | nd |
| 103399 | FSIS11807513 | USA | N | Y | wt |

|        |              |     |   |   |    |
|--------|--------------|-----|---|---|----|
| 103473 | FSIS11706867 | USA | N | N | nd |
| 103475 | FSIS11706740 | USA | N | Y | wt |
| 103477 | FSIS11706873 | USA | N | N | wt |
| 103480 | FSIS11706764 | USA | N | N | wt |
| 103490 | FSIS11706880 | USA | Y | Y | F  |
| 103502 | FSIS11706929 | USA | N | N | nd |
| 103505 | FSIS11807184 | USA | N | Y | nd |
| 103516 | FSIS11706073 | USA | N | N | nd |
| 103517 | FSIS11706879 | USA | N | N | nd |
| 103519 | FSIS11807039 | USA | N | N | wt |
| 103539 | FSIS11706891 | USA | N | N | wt |
| 103540 | FSIS11807049 | USA | N | N | wt |
| 103556 | FSIS11706601 | USA | N | Y | wt |
| 103596 | FSIS11706259 | USA | N | N | wt |
| 103636 | FSIS11705423 | USA | N | Y | nd |
| 103638 | FSIS11705804 | USA | N | N | wt |
| 103648 | FSIS11706400 | USA | N | N | nd |
| 103679 | FSIS11704748 | USA | N | N | nd |
| 103692 | FSIS11704713 | USA | N | Y | nd |
| 103703 | FSIS11704743 | USA | N | N | wt |
| 103745 | FSIS11704514 | USA | N | Y | wt |
| 103789 | FSIS11703918 | USA | N | N | wt |
| 103808 | FSIS11703899 | USA | N | N | E  |
| 103817 | FSIS1703794  | USA | N | N | nd |
| 103820 | FSIS1703628  | USA | N | N | wt |
| 103856 | FSIS1703251  | USA | N | Y | wt |
| 103902 | FSIS1702873  | USA | N | N | F  |
| 103903 | FSIS1702857  | USA | N | N | nd |
| 103910 | FSIS1702713  | USA | N | N | nd |
| 103998 | FSIS1701494  | USA | N | Y | F  |
| 104006 | FSIS1700981  | USA | N | N | wt |
| 104013 | FSIS1700968  | USA | N | N | wt |
| 104039 | FSIS1700485  | USA | N | N | wt |
| 104053 | FSIS1700670  | USA | N | Y | wt |
| 104061 | FSIS1700826  | USA | N | Y | wt |
| 104084 | FSIS1700486  | USA | N | Y | wt |
| 104096 | FSIS1711071  | USA | N | N | wt |
| 104100 | FSIS1711070  | USA | N | Y | wt |
| 104115 | FSIS1609024  | USA | N | N | nd |
| 104117 | FSIS1710457  | USA | N | N | wt |
| 104140 | FSIS1710059  | USA | N | Y | wt |
| 104152 | FSIS1609657  | USA | N | N | wt |
| 104154 | FSIS1609023  | USA | N | N | wt |
| 104158 | FSIS1609480  | USA | N | N | nd |
| 104198 | FSIS1607843  | USA | N | Y | F  |
| 104209 | FSIS1607734  | USA | N | N | wt |
| 104225 | FSIS1607462  | USA | N | N | D  |



|        |              |     |   |   |    |
|--------|--------------|-----|---|---|----|
| 104240 | FSIS1607378  | USA | N | N | wt |
| 104279 | FSIS1505125  | USA | N | N | wt |
| 104336 | FSIS1502920  | USA | N | N | wt |
| 104358 | FSIS1504655  | USA | N | Y | wt |
| 104378 | FSIS11816281 | USA | N | N | nd |
| 104389 | FSIS11918472 | USA | N | Y | wt |
| 104400 | FSIS11918477 | USA | N | N | wt |
| 104463 | FSIS11816480 | USA | N | N | wt |
| 104473 | FSIS11816453 | USA | N | Y | wt |
| 104475 | FSIS11816677 | USA | N | N | wt |
| 104490 | FSIS11918171 | USA | N | N | nd |
| 104500 | FSIS11918193 | USA | N | N | nd |
| 104551 | FSIS11918168 | USA | N | Y | F  |
| 104561 | FSIS11815690 | USA | N | N | wt |
| 104571 | FSIS11918235 | USA | N | N | wt |
| 104586 | FSIS11918163 | USA | N | Y | nd |
| 104601 | FSIS11918236 | USA | N | N | wt |
| 104620 | FSIS11816035 | USA | N | N | wt |
| 104626 | FSIS11816037 | USA | N | N | wt |
| 104638 | FSIS11815861 | USA | Y | N | nd |
| 104673 | FSIS11917957 | USA | N | N | wt |
| 104697 | FSIS11815245 | USA | N | Y | wt |
| 104700 | FSIS11815256 | USA | N | N | wt |
| 104704 | FSIS11815264 | USA | Y | Y | wt |
| 104726 | FSIS11917653 | USA | N | N | wt |
| 104729 | FSIS11917663 | USA | N | N | F  |
| 104743 | FSIS11917915 | USA | N | N | nd |
| 104766 | FSIS11917646 | USA | N | Y | F  |
| 104787 | FSIS11917923 | USA | N | N | wt |
| 104793 | FSIS11917491 | USA | N | N | wt |
| 104839 | FSIS11917199 | USA | Y | Y | wt |
| 104847 | FSIS11917145 | USA | N | N | wt |
| 104848 | FSIS11917146 | USA | N | N | wt |
| 104859 | FSIS11917150 | USA | N | Y | wt |
| 104862 | FSIS11917159 | USA | N | N | wt |
| 104863 | FSIS11917180 | USA | N | Y | wt |
| 104865 | FSIS11917148 | USA | N | N | wt |
| 104876 | FSIS11917194 | USA | N | Y | wt |
| 104883 | FSIS11917196 | USA | Y | N | wt |
| 104913 | FSIS11816867 | USA | N | Y | nd |
| 104918 | FSIS11816866 | USA | N | Y | nd |
| 104946 | FSIS11816880 | USA | N | Y | wt |
| 104954 | FSIS11816489 | USA | N | N | nd |
| 104988 | FSIS11816437 | USA | N | Y | wt |
| 105050 | FSIS11815672 | USA | N | N | wt |
| 105057 | FSIS11815698 | USA | N | Y | wt |
| 105071 | FSIS11816047 | USA | N | Y | wt |

|        |              |     |   |   |    |
|--------|--------------|-----|---|---|----|
| 105080 | FSIS11815881 | USA | N | N | nd |
| 105113 | FSIS11815467 | USA | N | N | wt |
| 105118 | FSIS11815455 | USA | N | N | wt |
| 105164 | FSIS11814758 | USA | N | Y | wt |
| 105186 | FSIS11814594 | USA | N | N | wt |
| 105225 | FSIS11814012 | USA | Y | N | wt |
| 105236 | FSIS11814262 | USA | N | N | wt |
| 105257 | FSIS11814272 | USA | N | Y | wt |
| 105266 | FSIS11814247 | USA | N | N | E  |
| 105309 | FSIS11815661 | USA | N | N | wt |
| 105346 | FSIS11815481 | USA | N | Y | wt |
| 105364 | FSIS11815000 | USA | N | Y | nd |
| 105371 | FSIS11815242 | USA | N | N | wt |
| 108930 | KKC321       | USA | N | N | wt |

---

<sup>1</sup> unk: an incomplete gene sequence and could not determine if it was functional; Y: present ; N: no gene

<sup>2</sup> unk: an incomplete gene sequence and could not determine if it was functional; Y: present ; N: no gene

<sup>3</sup> wt: wt *cts* genes; E: *ctsE* mutation ; F: *ctsF* mutation
