# Supplementary material for: Genomic Analysis Points to Multiple Genetic Mechanisms for Non-Transformable Campylobacter jejuni ST-50
Source: MDPI journal article supplement (doi:10.3390/microorganisms12020327), 2024-02-04
Supplement: s1 [file s1]

**Table S3. Campylobacter jejuni ST-50 strains from Australia**

| Isolate name | Year | Bioproject  | Accession No. | <i>dns</i> <sup>1</sup> | <i>dns2</i> <sup>2</sup> | <i>dns3</i> <sup>3</sup> | <i>cts</i> <sup>4</sup> |
|--------------|------|-------------|---------------|-------------------------|--------------------------|--------------------------|-------------------------|
| 17N3175F1    | 2017 | PRJNA591966 | SRR10537747   | N                       | Y                        | N                        | E                       |
| 17N3205F1    | 2017 | PRJNA591966 | SRR10537741   | N                       | Y                        | N                        | E                       |
| 17Q3056F1    | 2017 | PRJNA591966 | SRR10537529   | Y                       | N                        | N                        | wt                      |
| 17Q3062F1    | 2017 | PRJNA591966 | SRR10537522   | N                       | Y                        | N                        | wt                      |
| 17Q3066F1    | 2017 | PRJNA591966 | SRR10537518   | N                       | N                        | N                        | wt                      |
| 17Q3071F1    | 2017 | PRJNA591966 | SRR10537513   | N                       | N                        | N                        | wt                      |
| 17Q3074F1    | 2017 | PRJNA591966 | SRR10537509   | N                       | Y                        | N                        | E                       |
| 17Q3082F1    | 2017 | PRJNA591966 | SRR10537500   | N                       | Y                        | N                        | wt                      |
| 17Q3097F1    | 2017 | PRJNA591966 | SRR10537477   | N                       | Y                        | N                        | E                       |
| 17Q3102F1    | 2017 | PRJNA591966 | SRR10537472   | N                       | Y                        | N                        | E                       |
| 17Q3108F1    | 2017 | PRJNA591966 | SRR10537466   | N                       | Y                        | N                        | wt                      |
| 17Q3113F1    | 2017 | PRJNA591966 | SRR10537461   | N                       | Y                        | N                        | wt                      |
| 17Q3136F1    | 2017 | PRJNA591966 | SRR10538054   | Y                       | N                        | N                        | wt                      |
| 18A3021F1    | 2018 | PRJNA591966 | SRR10537601   | N                       | N                        | N                        | wt                      |
| 18A3025F1    | 2018 | PRJNA591966 | SRR10537545   | N                       | N                        | N                        | wt                      |
| 18N3050F1    | 2018 | PRJNA591966 | SRR10537683   | Y                       | N                        | N                        | wt                      |
| 18Q3012F1    | 2018 | PRJNA591966 | SRR10538035   | Y                       | N                        | N                        | wt                      |
| 18Q3020F1    | 2018 | PRJNA591966 | SRR10538026   | N                       | Y                        | N                        | E                       |
| 18Q3030F1    | 2018 | PRJNA591966 | SRR10538016   | N                       | Y                        | N                        | E                       |
| 18Q3034F1    | 2018 | PRJNA591966 | SRR10538012   | N                       | Y                        | N                        | E                       |
| 18V3025F1    | 2018 | PRJNA591966 | SRR10537908   | Y                       | N                        | N                        | wt                      |
| 18V3038F1    | 2018 | PRJNA591966 | SRR10537893   | N                       | N                        | N                        | wt                      |
| 18V3046F1    | 2018 | PRJNA591966 | SRR10537883   | N                       | N                        | N                        | wt                      |

<sup>1</sup> Y: present ; N: no gene

<sup>2</sup> Y: present ; N: no gene

<sup>3</sup> Y: present ; N: no gene

<sup>4</sup> wt: wt *cts* genes; E: *ctsE* mutation
