# Supplementary material for: Genomic Analysis Points to Multiple Genetic Mechanisms for Non-Transformable Campylobacter jejuni ST-50
Source: MDPI journal article supplement (doi:10.3390/microorganisms12020327), 2024-02-04
Supplement: s1 [file s1]

Table S2. *Campylobacter jejuni* ST-50 strains from North America and Europe from PubMLS

| PubMLST |                | <i>dns2 or</i> |      |             |                         |                          |                         |
|---------|----------------|----------------|------|-------------|-------------------------|--------------------------|-------------------------|
| id      | Strain         | Country        | Year | Source      | <i>dns</i> <sup>1</sup> | <i>dns3</i> <sup>2</sup> | <i>cts</i> <sup>3</sup> |
| 35308   | Cj87330        | USA            |      | chicken     | N                       | N                        | wt                      |
| 47403   | 41923          | USA            | 2009 | human       | Y                       | N                        |                         |
| 47411   | 41912          | USA            | 2008 | human       | Y                       | N                        |                         |
| 57180   | BCW_6919       | USA            |      | sheep       | Y                       | N                        |                         |
| 57475   | BCW_4731       | USA            |      |             | N                       | Y                        | F                       |
| 57491   | BCW_5123       | USA            |      | human       | Y                       | N                        |                         |
| 57504   | BCW_5141       | USA            |      | human       | N                       |                          |                         |
| 57531   | BCW_6872       | USA            |      | wild bird   | N                       | N                        | DE                      |
| 62031   | FSIS1606748    | USA            | 2016 | cattle      | Y                       | N                        | DE                      |
| 62107   | CVM N56306     | USA            | 2015 | chicken     | N                       | Y                        |                         |
| 62108   | CVM N58758     | USA            | 2015 | chicken     | N                       | Y                        |                         |
| 62109   | CVM N62614     | USA            | 2015 | chicken     | N                       | Y                        |                         |
| 62110   | CVM N62615     | USA            | 2015 | chicken     | N                       | Y                        |                         |
| 70358   | PNUSAC000034   | USA            | 2014 | human       | Y                       | N                        |                         |
| 70359   | 20100326       | USA            |      | human       | Y                       | N                        |                         |
| 70360   | 2005117        | USA            |      | human       | Y                       | N                        |                         |
| 70361   | 2014D-0170     | USA            |      | human       | N                       | N                        | DE                      |
| 70362   | 2014D-0222     | USA            |      | human       | N                       | Y                        | DE                      |
| 70363   | 2014D-0250     | USA            |      | human       | N                       | Y                        |                         |
| 70364   | 20100144       | USA            |      | human       | N                       | N                        | D                       |
| 70365   | 2012AY-1101    | USA            |      | human       | Y                       | N                        |                         |
| 70366   | 2015D-0003     | USA            |      | human       | N                       | Y                        |                         |
| 70367   | PNUSAC000097   | USA            | 2015 | human       | N                       | Y                        |                         |
| 70368   | PNUSAC000153   | USA            | 2015 | human       | N                       | Y                        |                         |
| 70369   | PNUSAC000162   | USA            | 2015 | human       | Y                       | N                        | DE                      |
| 70370   | PNUSAC000163   | USA            | 2015 | human       | N                       | N                        |                         |
| 70371   | PNUSAC000249   | USA            | 2015 | human       | N                       | N                        | DE                      |
| 70373   | 2012D-9287     | USA            |      | human       | N                       | Y                        | DE                      |
| 70374   | 2015D-0128     | USA            |      | human       | N                       | N                        | DE                      |
| 70375   | 2015D-0096     | USA            |      | human       | Y                       | N                        | DE                      |
| 70376   | 2015D-0022     | USA            |      | human       | N                       | Y                        |                         |
| 70377   | 2012D-9292     | USA            |      | human       | Y                       | N                        |                         |
| 70378   | PNUSAC000281   | USA            | 2016 | human       | Y                       | N                        |                         |
| 78540   | SKS6840_20_S41 | USA            | 2016 | human stool | N                       | N                        | DE                      |
| 78572   | SKS6875_55_S81 | USA            | 2016 | human stool | Y                       | N                        | DE                      |
| 79188   | CVM N17C204    | USA            | 2017 | chicken     | N                       | Y                        |                         |
| 79192   | CVM N17C209    | USA            | 2017 | chicken     | N                       | Y                        |                         |
| 79200   | CVM N17C419    | USA            | 2017 | turkey      | Y                       | N                        |                         |
| 79210   | PS00234        | USA            | 2017 | human       | Y                       | Y                        | D                       |
| 79211   | PS00235        | USA            | 2017 | human       | N                       | N                        |                         |
| 79240   | PS00291        | USA            | 2017 | human       | N                       | Y                        |                         |
| 80734   | PS00309        | USA            | 2018 | human       | Y                       | N                        |                         |
| 80738   | PS00313        | USA            | 2018 | human       | N                       | Y                        |                         |

|       |              |     |      |         |   |   |    |
|-------|--------------|-----|------|---------|---|---|----|
| 80757 | PS00332      | USA | 2018 | human   | N | Y |    |
| 80786 | PS00363      | USA | 2018 | human   | N | Y |    |
| 80803 | CVM N18C201  | USA | 2018 | chicken | N | Y |    |
| 80874 | PNUSAC010124 | USA |      |         | N | N |    |
| 80877 | PNUSAC009510 | USA |      |         | Y | N |    |
| 80907 | PNUSAC009920 | USA |      |         | Y | N | DE |
| 80950 | PNUSAC009545 | USA |      |         | Y | N | DE |
| 80978 | PNUSAC009538 | USA |      |         | Y | N | DE |
| 80985 | PNUSAC009644 | USA |      |         | N | N | DE |
| 81016 | PNUSAC009452 | USA |      |         | Y | N | DE |
| 81019 | PNUSAC009455 | USA |      |         | Y | N | DE |
| 81031 | PNUSAC009604 | USA |      |         | Y | Y | DE |
| 81052 | PNUSAC009573 | USA |      |         | Y | N | DE |
| 81053 | PNUSAC009572 | USA |      |         | N | N | DE |
| 81056 | PNUSAC009556 | USA |      |         | Y | N |    |
| 81080 | PNUSAC009414 | USA |      |         | N | N |    |
| 81148 | PNUSAC009063 | USA |      |         | Y | N |    |
| 81196 | PNUSAC006088 | USA |      |         | Y | N |    |
| 81205 | PNUSAC005960 | USA |      |         | Y | N |    |
| 81218 | PNUSAC006063 | USA |      |         | Y | Y |    |
| 81223 | PNUSAC006067 | USA |      |         | Y | N | DE |
| 81297 | PNUSAC005963 | USA |      |         | N | N | DE |
| 81316 | PNUSAC005866 | USA |      |         | Y | N |    |
| 81327 | PNUSAC005842 | USA |      |         | Y | N |    |
| 81353 | PNUSAC005867 | USA |      |         | N | N |    |
| 81359 | PNUSAC005780 | USA |      |         | Y | N |    |
| 81450 | PNUSAC005826 | USA |      |         | Y | Y |    |
| 81465 | PNUSAC005820 | USA |      |         | N | N | DE |
| 81521 | PNUSAC005594 | USA |      |         | Y | N |    |
| 81566 | PNUSAC005546 | USA |      |         | Y | N |    |
| 81582 | PNUSAC005485 | USA |      |         | Y | N |    |
| 81594 | PNUSAC005545 | USA |      |         | Y | N |    |
| 81646 | PNUSAC005622 | USA |      |         | N | N |    |
| 81668 | PNUSAC005627 | USA |      |         | N |   |    |
| 81689 | PNUSAC005402 | USA |      |         | Y | Y |    |
| 81709 | PNUSAC005578 | USA |      |         | N | N |    |
| 81711 | PNUSAC005520 | USA |      |         | Y | N | DE |
| 81712 | PNUSAC005581 | USA |      |         | Y | N |    |
| 81732 | PNUSAC005528 | USA |      |         | Y | N |    |
| 81737 | PNUSAC005366 | USA |      |         | N | N | DE |
| 81750 | PNUSAC005381 | USA |      |         | Y | N |    |
| 81765 | PNUSAC005484 | USA |      |         | N | N | DE |
| 81794 | PNUSAC005441 | USA |      |         | Y | N |    |
| 81806 | PNUSAC005436 | USA |      |         | N |   |    |
| 81857 | PNUSAC005184 | USA |      |         | N | N | DE |
| 81870 | PNUSAC005190 | USA |      |         | N |   |    |
| 81880 | PNUSAC005308 | USA |      |         | Y | Y |    |

|       |                    |     |   |   |    |
|-------|--------------------|-----|---|---|----|
| 81886 | PNUSAC005205       | USA | Y | N |    |
| 81910 | PNUSAC005309       | USA | N | N | DE |
| 81933 | PNUSAC005286       | USA | N | Y |    |
| 81959 | PNUSAC004281       | USA | Y | Y |    |
| 82015 | PNUSAC005272       | USA | Y | N |    |
| 82154 | PNUSAC005088       | USA | N | Y |    |
| 82245 | PNUSAC004643       | USA | Y | Y |    |
| 82280 | PNUSAC000097       | USA | N | Y |    |
| 82307 | PNUSAC004994       | USA | N | Y |    |
| 82344 | PNUSAC004969       | USA | Y | N |    |
| 82359 | PNUSAC004906       | USA | N | Y |    |
| 82364 | PNUSAC004923       | USA | Y | N | DE |
| 82378 | PNUSAC004834       | USA | N | Y |    |
| 82384 | PNUSAC004857       | USA | N | N |    |
| 82393 | PNUSAC004915       | USA | N | N | F  |
| 82400 | PNUSAC004864       | USA | Y | N | DE |
| 82437 | PNUSAC004832       | USA | N | N | DE |
| 82448 | PNUSAC004777       | USA | Y | N |    |
| 82449 | PNUSAC004766       | USA | N | Y |    |
| 82456 | PNUSAC004734       | USA | Y | Y |    |
| 82471 | PNUSAC004741       | USA | Y | N |    |
| 82492 | PNUSAC004661       | USA | N | N | DE |
| 82507 | PNUSAC004708       | USA | Y | Y |    |
| 82524 | PNUSAC004701       | USA | Y | N |    |
| 82525 | PNUSAC003977       | USA | Y | N |    |
| 82530 | PNUSAC003976       | USA | Y | N |    |
| 82555 | PNUSAC004256       | USA | N | Y |    |
| 82623 | PNUSAC000987       | USA | N | Y |    |
| 82641 | TESTWGCAMPY0003852 | USA | N | N | DE |
| 82678 | PNUSAC001933       | USA | Y | N | DE |
| 82682 | PNUSAC009364       | USA | Y | N | DE |
| 82699 | PNUSAC009283       | USA | N | Y |    |
| 82712 | PNUSAC009249       | USA | Y | N |    |
| 82734 | PNUSAC002012       | USA | N | N | DE |
| 82776 | PNUSAC008916       | USA | N |   |    |
| 82793 | PNUSAC002010       | USA | N | N | DE |
| 82827 | PNUSAC001968       | USA | N | Y |    |
| 82830 | PNUSAC001969       | USA | N | Y |    |
| 82875 | PNUSAC002165       | USA | N | Y |    |
| 82902 | PNUSAC001645       | USA | N | Y |    |
| 82980 | PNUSAC000516       | USA | Y | N |    |
| 83002 | PNUSAC000885       | USA | N | N |    |
| 83025 | PNUSAC000707       | USA | Y | N |    |
| 83044 | TESTWGCAMPY0004063 | USA | Y | Y |    |
| 83076 | PNUSAC002121       | USA | N | N |    |
| 83134 | PNUSAC002811       | USA | Y | N | DE |
| 83201 | PNUSAC008944       | USA | N | Y |    |

|       |                     |     |   |   |    |
|-------|---------------------|-----|---|---|----|
| 83210 | PNUSAC008541        | USA | N | N |    |
| 83340 | PNUSAC000952        | USA | N | N | DE |
| 83360 | PNUSAC000874        | USA | N | Y |    |
| 83439 | PNUSAC004461        | USA | N | N |    |
| 83463 | PNUSAC004166        | USA | Y | N |    |
| 83487 | PNUSAC002178        | USA | N | N |    |
| 83532 | PNUSAC002523        | USA | N | N |    |
| 83558 | 2016D-0258          | USA | Y | N | DE |
| 83607 | PNUSAC002948        | USA | Y | N | DE |
| 83683 | PNUSAC003416        | USA | N | N | DE |
| 83685 | PNUSAC002653        | USA | Y | N |    |
| 83691 | PNUSAC003826        | USA | N | Y |    |
| 83694 | PNUSAC002895        | USA | N | N | DE |
| 83708 | PNUSAC003141        | USA | Y | N |    |
| 83720 | PNUSAC002886        | USA | Y | N |    |
| 83723 | PNUSAC003340        | USA | Y | N |    |
| 83737 | PNUSAC003431        | USA | N | Y |    |
| 83831 | PNUSAC001657        | USA | N | Y |    |
| 83836 | PNUSAC001722        | USA | N | N |    |
| 83856 | PNUSAC001635        | USA | N | N |    |
| 83902 | PNUSAC003000        | USA | N | Y |    |
| 83953 | PNUSAC004279        | USA | Y | Y |    |
| 83975 | PNUSAC003735        | USA | N | Y |    |
| 83989 | PNUSAC003729        | USA | N |   |    |
| 84005 | PNUSAC001694        | USA | N |   | DE |
| 84024 | PNUSAC000722        | USA | Y | N | DE |
| 84034 | PNUSAC001133        | USA | N | Y |    |
| 84039 | PNUSAC001466        | USA | Y | N | DE |
| 84052 | PNUSAC003075        | USA | N | Y |    |
| 84091 | PNUSAC001613        | USA | Y | N |    |
| 84117 | PNUSAC000471        | USA | N | Y |    |
| 84156 | PNUSAC001465        | USA | Y | N | DE |
| 84206 | PNUSAC000750        | USA | N | N |    |
| 84248 | PNUSAC001136        | USA | Y | N | DE |
| 84250 | PNUSAC002740        | USA | N | N |    |
| 84336 | PNUSAC001841        | USA | Y | N |    |
| 84338 | PNUSAC001665        | USA | Y | N |    |
| 84364 | PNUSAC000515        | USA | Y | N |    |
| 84380 | PNUSAC000436        | USA | N | Y |    |
| 84435 | 2016D-0064          | USA | N | Y |    |
| 84501 | TESTWGCAMPY0003766  | USA | N | Y | DE |
| 84522 | PNUSAC000258        | USA | Y | N |    |
| 84537 | PNUSAC000264        | USA | Y | N |    |
| 84557 | PNUSAC000116        | USA | Y | N |    |
| 84563 | PNUSAC000130        | USA | Y | N | DE |
| 84574 | TESTWGCAMPY10002671 | USA | N | Y |    |
| 84653 | TESTWGCAMPY0002095  | USA | N | Y | DE |

|       |                     |     |     |   |    |
|-------|---------------------|-----|-----|---|----|
| 84697 | TESTWGCAMPY0002353  | USA | Y   | N |    |
| 84726 | PNUSAC009154        | USA | Y   | N | DE |
| 84758 | PNUSAC001232        | USA | Y   | N |    |
| 84775 | PNUSAC001413        | USA | Y   | N |    |
| 84782 | PNUSAC001287        | USA | N   | Y |    |
| 84814 | PNUSAC008544        | USA | Y   | N |    |
| 84829 | PNUSAC001468        | USA | Y   | N | DE |
| 84901 | PNUSAC001254        | USA | Y   | N |    |
| 84918 | PNUSAC001189        | USA | N   | N | DE |
| 84934 | PNUSAC001179        | USA | N   | Y |    |
| 84941 | PNUSAC001053        | USA | N   | Y |    |
| 84947 | PNUSAC001098        | USA | Y   | N |    |
| 84973 | PNUSAC000994        | USA | Y   | N | DE |
| 85120 | PNUSAC000592        | USA | N   | N | DE |
| 85148 | TESTWGCAMPY0003975  | USA | N   | N | DE |
| 85153 | TESTWGCAMPY0004054  | USA | Y   | N | DE |
| 85189 | PNUSAC000494        | USA | Y   | N | DE |
| 85202 | TESTWGCAMPY0004103  | USA | N   | Y |    |
| 85214 | PNUSAC000518        | USA | Y   | N |    |
| 85291 | PNUSAC000115        | USA | N   | Y |    |
| 85333 | TESTWGCAMPY10002672 | USA | Y   | N |    |
| 85366 | TESTWGCAMPY0002061  | USA | N   | N | DE |
| 85393 | PNUSAC000007        | USA | N   | Y |    |
| 85432 | PNUSAC000032        | USA | N   | Y |    |
| 85436 | PNUSAC007736        | USA | N   | N | DE |
| 85440 | PNUSAC007737        | USA | N   | N | DE |
| 85453 | PNUSAC009003        | USA | Y   | Y |    |
| 85454 | PNUSAC007739        | USA | Y   | N | DE |
| 85481 | PNUSAC008948        | USA | Y   | N |    |
| 85581 | PNUSAC004473        | USA | Y   | Y |    |
| 85653 | PNUSAC004207        | USA | Y   | Y |    |
| 85656 | PNUSAC004144        | USA | N   | N | DE |
| 85660 | PNUSAC004089        | USA | N   | N |    |
| 85785 | PNUSAC003676        | USA | unk |   |    |
| 85799 | PNUSAC004332        | USA | N   | Y |    |
| 85824 | PNUSAC004079        | USA | N   | N | DE |
| 85839 | PNUSAC004208        | USA | Y   | Y |    |
| 85840 | PNUSAC004325        | USA | Y   | N |    |
| 85904 | PNUSAC004226        | USA | N   | Y |    |
| 85927 | PNUSAC004221        | USA | N   | Y |    |
| 85947 | PNUSAC003821        | USA | N   | N |    |
| 85957 | PNUSAC003738        | USA | N   | Y |    |
| 85974 | PNUSAC003736        | USA | N   | Y |    |
| 85999 | PNUSAC003568        | USA | Y   | N | DE |
| 86029 | PNUSAC004399        | USA | N   | N | DE |
| 86033 | PNUSAC004114        | USA | N   | Y |    |
| 86243 | PNUSAC002913        | USA | N   |   |    |

|       |              |     |   |   |    |
|-------|--------------|-----|---|---|----|
| 86273 | PNUSAC003778 | USA | N | Y |    |
| 86291 | PNUSAC003665 | USA | N | N | DE |
| 86322 | PNUSAC003339 | USA | Y | N |    |
| 86363 | PNUSAC003125 | USA | N | Y |    |
| 86368 | PNUSAC003475 | USA | N | N | DE |
| 86399 | PNUSAC002915 | USA | Y | N | DE |
| 86421 | PNUSAC003290 | USA | Y | N |    |
| 86442 | PNUSAC003239 | USA | Y | N | DE |
| 86452 | PNUSAC002284 | USA | N | Y |    |
| 86519 | PNUSAC002474 | USA | N | N | E  |
| 86561 | PNUSAC002835 | USA | N | N | DE |
| 86654 | PNUSAC002777 | USA | N | N |    |
| 86688 | PNUSAC002385 | USA | Y | N |    |
| 86700 | PNUSAC001957 | USA | N | N | DE |
| 86701 | PNUSAC002882 | USA | Y | N | DE |
| 86781 | PNUSAC002147 | USA | Y | N | DE |
| 86783 | PNUSAC002598 | USA | Y | N |    |
| 86790 | PNUSAC002363 | USA | N | Y |    |
| 86801 | PNUSAC002327 | USA | N | Y |    |
| 86809 | PNUSAC002758 | USA | N | N |    |
| 86810 | PNUSAC001298 | USA | N | Y |    |
| 86873 | PNUSAC003695 | USA | Y | Y |    |
| 86902 | PNUSAC003540 | USA | N | N |    |
| 86969 | PNUSAC003433 | USA | N | Y |    |
| 86976 | PNUSAC003451 | USA | N | N | E  |
| 86989 | PNUSAC003355 | USA | Y | Y |    |
| 86991 | PNUSAC003353 | USA | N | Y |    |
| 86994 | PNUSAC003341 | USA | N | N |    |
| 87001 | PNUSAC003417 | USA | N | N | DE |
| 87044 | PNUSAC003185 | USA | N | Y |    |
| 87061 | PNUSAC003250 | USA | Y | N |    |
| 87063 | PNUSAC003178 | USA | Y | N | DE |
| 87073 | PNUSAC003064 | USA | N | N | E  |
| 87079 | PNUSAC000589 | USA | N | Y |    |
| 87102 | PNUSAC000583 | USA | Y | N |    |
| 87118 | PNUSAC003176 | USA | N | N | DE |
| 87134 | PNUSAC000367 | USA | Y | N |    |
| 87144 | PNUSAC003143 | USA | N | Y |    |
| 87215 | PNUSAC002989 | USA | Y | N |    |
| 87217 | PNUSAC002926 | USA | Y | N | DE |
| 87231 | PNUSAC003096 | USA | Y | N |    |
| 87266 | PNUSAC002837 | USA | N | N |    |
| 87299 | PNUSAC002670 | USA | N | N | DE |
| 87333 | PNUSAC002665 | USA | Y | N |    |
| 87413 | PNUSAC002475 | USA | N | N | E  |
| 87420 | PNUSAC002434 | USA | N | Y |    |
| 87428 | PNUSAC002552 | USA | N | Y |    |

|       |                    |     |   |   |    |
|-------|--------------------|-----|---|---|----|
| 87440 | PNUSAC002471       | USA | N | Y |    |
| 87456 | PNUSAC002321       | USA | Y | N |    |
| 87468 | PNUSAC002329       | USA | Y | N | DE |
| 87496 | PNUSAC002282       | USA | N |   |    |
| 87571 | PNUSAC002054       | USA | Y | N |    |
| 87581 | PNUSAC002047       | USA | N | Y |    |
| 87665 | PNUSAC001550       | USA | Y | Y |    |
| 87735 | PNUSAC001147       | USA | Y | N |    |
| 87759 | PNUSAC000971       | USA | N | N |    |
| 87763 | PNUSAC000970       | USA | N | Y |    |
| 87776 | PNUSAC000868       | USA | N | Y |    |
| 87781 | PNUSAC000871       | USA | Y | N |    |
| 87854 | PNUSAC000464       | USA | Y | Y |    |
| 87960 | TESTWGCAMPY0004060 | USA | N | Y |    |
| 88024 | PNUSAC000128       | USA | N | Y |    |
| 88037 | TESTWGCAMPY0002438 | USA | Y | N |    |
| 88051 | TESTWGCAMPY0002350 | USA | N | N | D  |
| 88065 | TESTWGCAMPY0002110 | USA | N | Y |    |
| 88117 | TESTWGCAMPY0002405 | USA | Y | N |    |
| 88135 | PNUSAC000063       | USA | N | Y |    |
| 88150 | PNUSAC000005       | USA | N | Y |    |
| 88226 | PNUSAC008805       | USA | Y | N | F  |
| 88246 | PNUSAC008535       | USA | N | N | DE |
| 88253 | PNUSAC008811       | USA | Y | N |    |
| 88267 | PNUSAC008714       | USA | Y | N | DE |
| 88275 | PNUSAC008521       | USA | Y | N |    |
| 88287 | PNUSAC008599       | USA | Y | N | DE |
| 88340 | PNUSAC008591       | USA | N | Y |    |
| 88365 | PNUSAC008580       | USA | N | N |    |
| 88446 | PNUSAC007702       | USA | N | N | DE |
| 88452 | PNUSAC007679       | USA | N | N |    |
| 88455 | PNUSAC007668       | USA | Y | N | DE |
| 88460 | PNUSAC007648       | USA | N | N | DE |
| 88483 | PNUSAC007572       | USA | N | Y |    |
| 88484 | PNUSAC007544       | USA | N | N | F  |
| 88499 | PNUSAC007266       | USA | N | Y |    |
| 88500 | PNUSAC007559       | USA | Y | N |    |
| 88550 | PNUSAC007327       | USA | Y | N |    |
| 88552 | PNUSAC007203       | USA | N | Y |    |
| 88556 | PNUSAC007282       | USA | N | N | DE |
| 88626 | PNUSAC008468       | USA | N | N | DE |
| 88653 | PNUSAC006867       | USA | Y | N | DE |
| 88742 | PNUSAC007104       | USA | Y | N | DE |
| 88743 | PNUSAC007003       | USA | N | N |    |
| 88753 | PNUSAC007023       | USA | Y | N |    |
| 88759 | PNUSAC006901       | USA | N | Y |    |
| 88773 | PNUSAC006942       | USA | N | N |    |

|       |              |     |   |   |    |
|-------|--------------|-----|---|---|----|
| 88812 | PNUSAC007790 | USA | N | N | DE |
| 88872 | PNUSAC006892 | USA | N | N | DE |
| 88875 | PNUSAC006828 | USA | Y | N | DE |
| 88877 | PNUSAC006804 | USA | Y | N | DE |
| 88878 | PNUSAC006825 | USA | N | N |    |
| 88885 | PNUSAC006803 | USA | N | N | DE |
| 88886 | PNUSAC006688 | USA | Y | N |    |
| 88927 | PNUSAC007376 | USA | N |   |    |
| 88939 | PNUSAC004301 | USA | N | Y |    |
| 88942 | PNUSAC008412 | USA | N | N |    |
| 88954 | PNUSAC008039 | USA | N |   |    |
| 88958 | PNUSAC008140 | USA | N | N | DE |
| 88973 | PNUSAC008378 | USA | N | N |    |
| 89038 | PNUSAC008041 | USA | N | Y |    |
| 89061 | PNUSAC008134 | USA | N | N |    |
| 89078 | PNUSAC007851 | USA | Y | Y |    |
| 89129 | PNUSAC008135 | USA | N | N |    |
| 89138 | PNUSAC007944 | USA | Y | N |    |
| 89186 | PNUSAC007799 | USA | N | N | DE |
| 89204 | PNUSAC008126 | USA | Y | N | DE |
| 89210 | PNUSAC007485 | USA | Y | N |    |
| 89237 | PNUSAC007798 | USA | Y | N |    |
| 89242 | PNUSAC007809 | USA | Y | N |    |
| 89243 | PNUSAC007709 | USA | N | N |    |
| 89244 | PNUSAC008087 | USA | N | N | DE |
| 89313 | PNUSAC007961 | USA | N | Y |    |
| 89318 | PNUSAC007985 | USA | N | N | DE |
| 89322 | PNUSAC007999 | USA | N | Y |    |
| 89335 | PNUSAC007466 | USA | Y | N |    |
| 89361 | PNUSAC007498 | USA | N |   |    |
| 89378 | PNUSAC007462 | USA | Y | N |    |
| 89399 | PNUSAC007934 | USA | Y | N | DE |
| 89559 | PNUSAC007262 | USA | Y | N |    |
| 89591 | PNUSAC007324 | USA | Y | N |    |
| 89611 | PNUSAC007530 | USA | Y | N |    |
| 89634 | PNUSAC007263 | USA | Y | N |    |
| 89699 | PNUSAC006903 | USA | Y | N | DE |
| 89701 | PNUSAC006871 | USA | Y | N |    |
| 89745 | PNUSAC007130 | USA | Y | N |    |
| 89777 | PNUSAC007122 | USA | Y | N |    |
| 89842 | PNUSAC006978 | USA | N | Y |    |
| 89847 | PNUSAC006972 | USA | N | Y |    |
| 89857 | PNUSAC006977 | USA | N | Y |    |
| 89866 | PNUSAC006778 | USA | Y | N |    |
| 89871 | PNUSAC006776 | USA | Y | N | E  |
| 89905 | PNUSAC006819 | USA | Y | N |    |
| 89961 | PNUSAC006542 | USA | Y | N |    |



|       |              |     |   |   |    |
|-------|--------------|-----|---|---|----|
| 89963 | PNUSAC006545 | USA | Y | N |    |
| 90025 | PNUSAC006425 | USA | N | N |    |
| 90035 | PNUSAC006411 | USA | Y | N |    |
| 90037 | PNUSAC006419 | USA | Y | N | DE |
| 90052 | PNUSAC006363 | USA | Y | N | DE |
| 90053 | PNUSAC006388 | USA | Y | N | DE |
| 90057 | PNUSAC006390 | USA | Y | N |    |
| 90099 | PNUSAC006445 | USA | Y | Y |    |
| 90100 | PNUSAC006349 | USA | N | N | DE |
| 90106 | PNUSAC006415 | USA | Y | N | DE |
| 90171 | PNUSAC006210 | USA | Y | N | DE |
| 90178 | PNUSAC006182 | USA | Y | N |    |
| 90186 | PNUSAC006165 | USA | Y | N |    |
| 90205 | PNUSAC005892 | USA | Y | N |    |
| 90228 | PNUSAC006101 | USA | N | N | DE |
| 90237 | PNUSAC006112 | USA | Y | N |    |
| 90274 | PNUSAC006145 | USA | N | N |    |
| 90293 | PNUSAC006228 | USA | N | N | DE |
| 90307 | PNUSAC006225 | USA | N | N |    |
| 90315 | PNUSAC006238 | USA | N | N | DE |
| 90322 | PNUSAC006384 | USA | Y | N |    |
| 90323 | PNUSAC006529 | USA | N | N | DE |
| 90326 | PNUSAC006269 | USA | N | N | DE |
| 90329 | PNUSAC006537 | USA | N | N | DE |
| 90384 | PNUSAC006365 | USA | Y | N |    |
| 90387 | PNUSAC006389 | USA | Y | N |    |
| 90389 | PNUSAC005958 | USA | N |   |    |
| 90413 | PNUSAC006750 | USA | N | Y |    |
| 90427 | PNUSAC006498 | USA | Y | N |    |
| 90445 | PNUSAC006496 | USA | Y | N |    |
| 90469 | PNUSAC006730 | USA | N | Y | DE |
| 90476 | PNUSAC006755 | USA | Y | N |    |
| 90494 | PNUSAC006709 | USA | N | Y |    |
| 90524 | PNUSAC006666 | USA | Y | N | DE |
| 90571 | PNUSAC006261 | USA | Y | N |    |
| 90572 | PNUSAC006591 | USA | Y | N | DE |
| 90585 | PNUSAC006597 | USA | Y | N |    |
| 90602 | FSIS21924683 | USA | N | Y | D  |
| 90609 | FSIS11922163 | USA | Y | Y |    |
| 90620 | FSIS31902106 | USA | Y | N | DE |
| 90648 | FSIS11921568 | USA | N | Y |    |
| 90655 | FSIS11921791 | USA | Y | N | DE |
| 90659 | FSIS11921799 | USA | Y | N | DE |
| 90710 | FSIS31902120 | USA | N | Y |    |
| 90778 | FSIS11921537 | USA | Y | N | DE |
| 90786 | FSIS31902084 | USA | Y | N |    |
| 90796 | FSIS21924463 | USA | Y | N |    |

|       |              |     |   |   |    |
|-------|--------------|-----|---|---|----|
| 90882 | FSIS21924418 | USA | N | Y |    |
| 90891 | FSIS11921297 | USA | Y | N |    |
| 90984 | FSIS31901943 | USA | Y | N |    |
| 91055 | FSIS21924230 | USA | Y | N |    |
| 91082 | FSIS21924191 | USA | Y | N |    |
| 91088 | FSIS21924180 | USA | Y | N | DE |
| 91100 | FSIS11813653 | USA | Y | Y |    |
| 91114 | FSIS11813635 | USA | N | Y |    |
| 91143 | FSIS11813643 | USA | N | Y |    |
| 91152 | FSIS11813628 | USA | Y | Y | DE |
| 91180 | FSIS21822001 | USA | Y | N |    |
| 91193 | FSIS21822000 | USA | Y | N | DE |
| 91207 | FSIS11813342 | USA | Y | N | DE |
| 91236 | FSIS21821908 | USA | N | N | DE |
| 91241 | FSIS21821905 | USA | Y | N |    |
| 91244 | FSIS21821906 | USA | Y | N |    |
| 91273 | FSIS11813138 | USA | Y | Y |    |
| 91281 | FSIS11813120 | USA | N | Y |    |
| 91288 | FSIS11813143 | USA | N | Y |    |
| 91311 | FSIS11813108 | USA | N |   |    |
| 91389 | FSIS11812667 | USA | Y | N |    |
| 91416 | FSIS11812654 | USA | N | N |    |
| 91430 | FSIS31800817 | USA | N | N | DE |
| 91446 | FSIS11812354 | USA | Y | N |    |
| 91449 | FSIS11812357 | USA | N | Y |    |
| 91457 | FSIS11812355 | USA | N | Y |    |
| 91461 | FSIS11812346 | USA | N | Y |    |
| 91484 | FSIS11812371 | USA | N | Y |    |
| 91487 | FSIS11812150 | USA | N |   |    |
| 91493 | FSIS11812375 | USA | N |   |    |
| 91499 | FSIS11812152 | USA | Y | N |    |
| 91511 | FSIS11812129 | USA | Y | N |    |
| 91514 | FSIS11812126 | USA | Y | N |    |
| 91519 | FSIS11812137 | USA | Y | N |    |
| 91529 | FSIS11812121 | USA | Y | N |    |
| 91535 | FSIS11812115 | USA | Y | N | DE |
| 91560 | FSIS11811839 | USA | Y | Y | DE |
| 91563 | FSIS11811800 | USA | Y | Y | DE |
| 91580 | FSIS11811828 | USA | N | N | DE |
| 91671 | FSIS11811321 | USA | N | N | DE |
| 91673 | FSIS11811353 | USA | N | Y |    |
| 91728 | FSIS11811224 | USA | N | N |    |
| 91749 | FSIS11810827 | USA | N |   |    |
| 91757 | FSIS11811038 | USA | N | Y |    |
| 91788 | FSIS31800608 | USA | Y | N |    |
| 91860 | FSIS11810806 | USA | N | Y |    |
| 91872 | FSIS11810182 | USA | N | Y |    |

|       |              |     |   |   |    |
|-------|--------------|-----|---|---|----|
| 91884 | FSIS11810168 | USA | Y | N |    |
| 91908 | FSIS31800560 | USA | Y | N | DE |
| 91932 | FSIS31800545 | USA | Y | N |    |
| 91938 | FSIS21821758 | USA | Y | N |    |
| 92065 | FSIS21924168 | USA | Y | N | DE |
| 92074 | FSIS1701236  | USA | Y | N |    |
| 92086 | FSIS1700919  | USA | Y | N |    |
| 92088 | FSIS1700917  | USA | Y | N |    |
| 92157 | FSIS11920295 | USA | Y | N | DE |
| 92223 | FSIS1710996  | USA | Y | N |    |
| 92230 | FSIS1710834  | USA | N | N |    |
| 92231 | FSIS1700373  | USA | Y | N | DE |
| 92233 | FSIS1700206  | USA | N | Y |    |
| 92242 | FSIS1710999  | USA | Y | N |    |
| 92290 | FSIS11920076 | USA | Y | N | DE |
| 92317 | FSIS21924022 | USA | N | Y |    |
| 92319 | FSIS21924141 | USA | N | Y |    |
| 92339 | FSIS21923952 | USA | N | Y |    |
| 92340 | FSIS21923964 | USA | Y | N |    |
| 92341 | FSIS21924083 | USA | N | N | DE |
| 92366 | FSIS21924091 | USA | N | Y | E  |
| 92369 | FSIS31901835 | USA | N | Y |    |
| 92379 | FSIS11918860 | USA | N | N |    |
| 92391 | FSIS11920069 | USA | Y | Y |    |
| 92420 | FSIS11919363 | USA | N | Y |    |
| 92436 | FSIS1710695  | USA | N | Y | DE |
| 92455 | FSIS1710706  | USA | Y | N | DE |
| 92472 | FSIS1609690  | USA | N | N |    |
| 92474 | FSIS1703347  | USA | Y | N |    |
| 92532 | FSIS1607853  | USA | Y | N |    |
| 92573 | FSIS1703024  | USA | N | Y | X  |
| 92583 | FSIS1702913  | USA | N | N | DE |
| 92597 | FSIS21820901 | USA | Y | Y |    |
| 92625 | FSIS11705196 | USA | Y | N | DE |
| 92632 | FSIS11808250 | USA | Y | N |    |
| 92640 | FSIS1608924  | USA | Y | N | R  |
| 92653 | FSIS1609523  | USA | N | Y |    |
| 92706 | FSIS11704848 | USA | Y | Y |    |
| 92718 | FSIS31800460 | USA | N | N | DE |
| 92739 | FSIS1609736  | USA | Y | N |    |
| 92750 | FSIS1609374  | USA | N | Y |    |
| 92761 | FSIS1609205  | USA | Y | N | DE |
| 92795 | FSIS1608913  | USA | N | Y |    |
| 92843 | FSIS21720586 | USA | Y | N |    |
| 92849 | FSIS1710531  | USA | Y | N | DE |
| 92858 | FSIS1710333  | USA | Y | N |    |
| 92939 | FSIS11918846 | USA | Y | N | DE |

|       |              |     |   |   |    |
|-------|--------------|-----|---|---|----|
| 92951 | FSIS1709833  | USA | N | N | DE |
| 92953 | FSIS1709945  | USA | N | N |    |
| 92959 | FSIS1609357  | USA | Y | N | DE |
| 92973 | FSIS31901885 | USA | Y | N | DE |
| 93048 | FSIS11919629 | USA | Y | N |    |
| 93110 | FSIS1609739  | USA | N | Y |    |
| 93123 | FSIS1608758  | USA | Y | N |    |
| 93158 | FSIS1608343  | USA | Y | N |    |
| 93159 | FSIS1608209  | USA | N | N | DE |
| 93235 | FSIS11918662 | USA | Y | N |    |
| 93287 | FSIS11919395 | USA | N | Y |    |
| 93301 | FSIS11919145 | USA | N | N | DE |
| 93317 | FSIS11918895 | USA | Y | N |    |
| 93328 | FSIS11919633 | USA | Y | N | DE |
| 93333 | FSIS11919597 | USA | N | N | DE |
| 93363 | FSIS31800314 | USA | Y | N |    |
| 93380 | FSIS31800225 | USA | Y | Y |    |
| 93401 | FSIS31800462 | USA | N | Y |    |
| 93405 | FSIS1710995  | USA | Y | N |    |
| 93442 | FSIS31800410 | USA | N | N | DE |
| 93468 | FSIS21821541 | USA | N | Y |    |
| 93493 | FSIS21720686 | USA | Y | N |    |
| 93520 | FSIS31800272 | USA | N | Y |    |
| 93530 | FSIS11807971 | USA | Y | N |    |
| 93536 | FSIS11807307 | USA | Y | N |    |
| 93548 | FSIS11706119 | USA | Y | N |    |
| 93553 | FSIS11704847 | USA | N | N |    |
| 93559 | FSIS21720654 | USA | N | N |    |
| 93564 | FSIS21720232 | USA | N | Y |    |
| 93587 | FSIS11704003 | USA | Y | N | DE |
| 93594 | FSIS1700744  | USA | Y | N | DE |
| 93623 | FSIS1710700  | USA | Y | N | DE |
| 93630 | FSIS1703177  | USA | Y | N |    |
| 93697 | FSIS1703025  | USA | Y | N |    |
| 93708 | FSIS31800185 | USA | Y | N | DE |
| 93736 | FSIS11705500 | USA | N |   |    |
| 93753 | FSIS11704929 | USA | Y | Y | DE |
| 93757 | FSIS21720818 | USA | Y | N |    |
| 93765 | FSIS21720820 | USA | N | Y |    |
| 93773 | FSIS21720655 | USA | N | N | D  |
| 93789 | FSIS21720461 | USA | Y | N |    |
| 93804 | FSIS21720316 | USA | Y | N | DE |
| 93884 | FSIS1701995  | USA | Y | N | E  |
| 93961 | FSIS1608029  | USA | Y | N |    |
| 94037 | FSIS1501560  | USA | Y | Y |    |
| 94053 | FSIS21923794 | USA | N | N | DE |
| 94072 | FSIS21923799 | USA | Y | N |    |

|       |              |     |   |   |    |
|-------|--------------|-----|---|---|----|
| 94111 | FSIS11918412 | USA | Y | N |    |
| 94113 | FSIS11918420 | USA | N |   |    |
| 94137 | FSIS21923734 | USA | N | N | DE |
| 94238 | FSIS11815845 | USA | N | Y |    |
| 94251 | FSIS11815630 | USA | Y | N |    |
| 94252 | FSIS11918270 | USA | Y | N |    |
| 94256 | FSIS11918272 | USA | Y | N |    |
| 94273 | FSIS21923187 | USA | N | Y |    |
| 94309 | FSIS11816242 | USA | Y | N | DE |
| 94336 | FSIS31801230 | USA | N | Y |    |
| 94338 | FSIS21822789 | USA | Y | N |    |
| 94386 | FSIS31901461 | USA | N | N | D  |
| 94406 | FSIS11815436 | USA | N | Y |    |
| 94413 | FSIS31801198 | USA | Y | Y |    |
| 94436 | FSIS21923633 | USA | N | N | DE |
| 94444 | FSIS21923643 | USA | Y | N | DE |
| 94482 | FSIS11917902 | USA | Y | N |    |
| 94491 | FSIS21923604 | USA | N | N | DE |
| 94532 | FSIS11917702 | USA | N | N | DE |
| 94549 | FSIS11917455 | USA | Y | N |    |
| 94586 | FSIS11917467 | USA | N | Y |    |
| 94591 | FSIS11917470 | USA | Y | Y |    |
| 94602 | FSIS11917306 | USA | Y | N |    |
| 94625 | FSIS11917272 | USA | N | N |    |
| 94681 | FSIS21923462 | USA | N | N |    |
| 94692 | FSIS21923515 | USA | Y | Y | DE |
| 94699 | FSIS21923470 | USA | N | Y |    |
| 94707 | FSIS21923457 | USA | Y | N |    |
| 94748 | FSIS11917023 | USA | Y | Y | DE |
| 94749 | FSIS11816822 | USA | Y | N | DE |
| 94759 | FSIS21923406 | USA | N |   |    |
| 94763 | FSIS21923377 | USA | Y | N |    |
| 94811 | FSIS11816841 | USA | Y | N |    |
| 94817 | FSIS31901495 | USA | Y | N |    |
| 94826 | FSIS11917039 | USA | Y | N |    |
| 94874 | FSIS11816584 | USA | Y | N | DE |
| 94879 | FSIS11816589 | USA | N | Y |    |
| 94901 | FSIS11816610 | USA | Y | N |    |
| 94903 | FSIS21923358 | USA | N | Y |    |
| 94907 | FSIS21923279 | USA | Y | N |    |
| 94948 | FSIS21923254 | USA | Y | Y |    |
| 94954 | FSIS21923198 | USA | N |   |    |
| 94975 | FSIS21923178 | USA | N | Y |    |
| 95121 | FSIS11816239 | USA | Y | N |    |
| 95128 | FSIS11816264 | USA | N | Y |    |
| 95188 | FSIS21822926 | USA | N | Y |    |
| 95194 | FSIS11815847 | USA | Y | N |    |

|       |              |     |   |   |    |
|-------|--------------|-----|---|---|----|
| 95251 | FSIS21822899 | USA | Y | N |    |
| 95338 | FSIS21822792 | USA | Y | N |    |
| 95345 | FSIS21822799 | USA | N | N | DE |
| 95352 | FSIS21822586 | USA | Y | N | DE |
| 95354 | FSIS21822600 | USA | N | Y |    |
| 95374 | FSIS21822571 | USA | Y | Y |    |
| 95396 | FSIS11815399 | USA | N | N | D  |
| 95430 | FSIS21822407 | USA | Y | Y |    |
| 95462 | FSIS21822385 | USA | N | Y |    |
| 95473 | FSIS21822371 | USA | Y | Y |    |
| 95499 | FSIS11814564 | USA | Y | N | DE |
| 95535 | FSIS11814390 | USA | Y | N |    |
| 95570 | FSIS21822127 | USA | N | N |    |
| 95575 | FSIS21822209 | USA | N | N | DE |
| 95617 | FSIS11814186 | USA | Y | N |    |
| 95816 | FSIS11814971 | USA | N | N | D  |
| 95833 | FSIS11814800 | USA | Y | N | DE |
| 95867 | FSIS11815200 | USA | Y | N |    |
| 95874 | FSIS11814992 | USA | Y | N | DE |
| 95876 | FSIS31801175 | USA | N | N | DE |
| 95887 | FSIS21822453 | USA | N | Y |    |
| 95890 | FSIS21822450 | USA | Y | N | DE |
| 96048 | CVM N17C829  | USA | Y | N |    |
| 96049 | CVM N17C823  | USA | N | N | D  |
| 96062 | CVM N17C570  | USA | N | Y |    |
| 96063 | CVM N17C578  | USA | Y | N | DE |
| 96081 | CVM N17C560  | USA | Y | N |    |
| 96092 | CVM N17C753  | USA | Y | N |    |
| 96096 | CVM N17C751  | USA | Y | N |    |
| 96119 | CVM N17C460  | USA | Y | N |    |
| 96126 | CVM N17C476  | USA | Y | N | DE |
| 96131 | CVM N17C795  | USA | Y | Y |    |
| 96149 | CVM N17C731  | USA | N | N | DE |
| 96156 | CVM N17C459  | USA | Y | N |    |
| 96163 | CVM N17C793  | USA | Y | Y |    |
| 96166 | CVM N17C830  | USA | Y | N |    |
| 96172 | CVM N17C779  | USA | Y | N |    |
| 96187 | CVM N17C722  | USA | N | Y |    |
| 96204 | CVM N17C692  | USA | Y | N |    |
| 96284 | CVM N17C755  | USA | Y | N |    |
| 96291 | CVM N17C359  | USA | N | Y |    |
| 96292 | CVM N17C754  | USA | Y | N |    |
| 96298 | CVM N17C257  | USA | Y | N |    |
| 96304 | CVM N17C281  | USA | N | N |    |
| 96317 | CVM N17C756  | USA | Y | N |    |
| 96345 | CVM N17C752  | USA | Y | N |    |
| 96361 | CVM N17C654  | USA | N | N |    |

|       |             |     |   |   |    |
|-------|-------------|-----|---|---|----|
| 96381 | CVM N17C631 | USA | Y | N |    |
| 96452 | CVM N17C589 | USA | N | N |    |
| 96532 | CVM N17C641 | USA | Y | N |    |
| 96590 | CVM N17C178 | USA | Y | N |    |
| 96599 | CVM N17C181 | USA | N | Y |    |
| 96658 | CVM N17C643 | USA | Y | Y |    |
| 96675 | CVM N17C265 | USA | N | Y |    |
| 96743 | CVM N17C564 | USA | Y | Y | DE |
| 96792 | CVM N17C565 | USA | Y | Y | DE |
| 96836 | CVM N59387  | USA | Y | Y |    |
| 96862 | CVM N59351  | USA | N | N | DE |
| 96866 | CVM N59348  | USA | N | N | DE |
| 96892 | CVM N58779  | USA | Y | Y |    |
| 96908 | CVM N59404  | USA | N | N | DE |
| 96921 | CVM N59365  | USA | Y | N |    |
| 96958 | CVM N58709  | USA | Y | Y |    |
| 96976 | CVM N58128  | USA | N | Y |    |
| 97034 | CVM N56285  | USA | N | Y |    |
| 97035 | CVM N56265  | USA | N | Y |    |
| 97047 | CVM N56270  | USA | Y | N |    |
| 97048 | CVM N55764  | USA | Y | N | F  |
| 97104 | CVM N16C099 | USA | N | Y |    |
| 97127 | CVM N16C548 | USA | Y | N | DE |
| 97128 | CVM N16C568 | USA | Y | N |    |
| 97143 | CVM N62984  | USA | Y | Y |    |
| 97144 | CVM N16C178 | USA | N | Y |    |
| 97149 | CVM N62988  | USA | Y | Y |    |
| 97161 | CVM N62658  | USA | N |   |    |
| 97172 | CVM N16C496 | USA | Y | N | DE |
| 97221 | CVM N62586  | USA | Y | Y | DE |
| 97228 | CVM N62611  | USA | Y | Y |    |
| 97259 | CVM N16C435 | USA | Y | Y |    |
| 97273 | CVM N16C237 | USA | Y | N |    |
| 97293 | CVM N16C369 | USA | Y | N |    |
| 97310 | CVM N16C368 | USA | N | N |    |
| 97338 | CVM N58102  | USA | Y | Y |    |
| 97410 | CVM N16C343 | USA | Y | N |    |
| 97503 | CVM N56604  | USA | Y | N |    |
| 97526 | CVM N62980  | USA | Y | Y |    |
| 97552 | CVM N16C027 | USA | N | Y |    |
| 97554 | CVM N16C042 | USA | N | N | DE |
| 97570 | CVM N16C117 | USA | N | Y |    |
| 97595 | CVM N62641  | USA | Y | N |    |
| 97615 | CVM N55920  | USA | N | Y |    |
| 97635 | CVM N16C507 | USA | N | N | DE |
| 97646 | CVM N16C485 | USA | N | N |    |
| 97666 | CVM N16C389 | USA | N | N |    |

|        |              |     |   |   |    |
|--------|--------------|-----|---|---|----|
| 97673  | CVM N16C375  | USA | Y | N | DE |
| 97685  | CVM N16C558  | USA | Y | N |    |
| 97715  | CVM N16C365  | USA | Y | N |    |
| 97721  | CVM N16C364  | USA | Y | N |    |
| 97798  | CVM N16C060  | USA | Y | N |    |
| 97838  | CVM N16C028  | USA | N | Y |    |
| 97867  | CVM N62987   | USA | Y | Y |    |
| 97884  | CVM N62589   | USA | N | Y |    |
| 97894  | CVM N62578   | USA | N | N |    |
| 97943  | CVM N55763   | USA | Y | N | F  |
| 97967  | CVM N18C006  | USA | N | N |    |
| 97975  | CVM N18C015  | USA | Y | N | DE |
| 97977  | CVM N18C014  | USA | Y | N | DE |
| 97995  | CVM N18C080  | USA | N | Y |    |
| 97999  | CVM N18C077  | USA | Y | N |    |
| 98015  | CVM N18C081  | USA | Y | N | DE |
| 98040  | CVM N18C065  | USA | Y | N |    |
| 98051  | CVM N18C064  | USA | Y | N |    |
| 98060  | CVM N18C049  | USA | N |   |    |
| 98089  | CVM N18C051  | USA | N |   |    |
| 98334  | CVM N18C223  | USA | Y | N |    |
| 98343  | FSIS11922137 | USA | N | Y |    |
| 98452  | FSIS11921474 | USA | N | Y |    |
| 98801  | FSIS11813162 | USA | Y | N |    |
| 98905  | FSIS11812590 | USA | Y | N | DE |
| 98915  | FSIS11812592 | USA | Y | N | DE |
| 98975  | FSIS11812589 | USA | Y | N |    |
| 98987  | FSIS11812063 | USA | N | Y |    |
| 98989  | FSIS11812061 | USA | N |   |    |
| 99040  | FSIS11811883 | USA | Y | N |    |
| 99148  | FSIS11811270 | USA | Y | N |    |
| 99214  | FSIS11810554 | USA | N | Y |    |
| 99248  | FSIS11810409 | USA | N | Y |    |
| 99443  | FSIS1607146  | USA | Y | Y |    |
| 100444 | FSIS11919764 | USA | N | N | D  |
| 100647 | FSIS11918820 | USA | Y | N |    |
| 100768 | FSIS11809509 | USA | N | Y |    |
| 101135 | FSIS11808045 | USA | N | Y |    |
| 101239 | FSIS11807497 | USA | Y | N | DE |
| 101660 | FSIS11919107 | USA | Y | Y |    |
| 101788 | FSIS11919302 | USA | Y | N | DE |
| 102072 | FSIS1504654  | USA | Y | Y |    |
| 102112 | FSIS11919568 | USA | Y | N |    |
| 102263 | FSIS11808595 | USA | Y | Y |    |
| 102381 | FSIS11808742 | USA | N | Y |    |
| 102657 | FSIS11809682 | USA | N | N | DE |
| 103002 | FSIS11706720 | USA | N | N | DE |



|        |              |              |      |                 |          |          |    |
|--------|--------------|--------------|------|-----------------|----------|----------|----|
| 103252 | FSIS1701497  | USA          |      |                 | Y        | N        |    |
| 103320 | FSIS1703269  | USA          |      |                 | Y        | N        |    |
| 103551 | FSIS11706472 | USA          |      |                 | Y        | Y        | DE |
| 104379 | FSIS11918488 | USA          |      |                 | Y        | N        |    |
| 104456 | FSIS11918425 | USA          |      |                 | Y        | Y        |    |
| 104567 | FSIS11918239 | USA          |      |                 | Y        | N        |    |
| 104675 | FSIS11917691 | USA          |      |                 | N        | N        | DE |
| 104678 | FSIS11917690 | USA          |      |                 | N        | N        | DE |
| 104732 | FSIS11917669 | USA          |      |                 | N        | N        | DE |
| 104816 | FSIS11816890 | USA          |      |                 | Y        | N        |    |
| 105028 | FSIS11816680 | USA          |      |                 | N        | N        |    |
| 105109 | FSIS11815680 | USA          |      |                 | Y        | N        |    |
| 105169 | FSIS11814751 | USA          |      |                 | Y        | Y        | DE |
| 105200 | FSIS11814428 | USA          |      |                 | N        | N        | DE |
| 106329 | SFBRC-21     | USA          | 2013 | waters          | Y        | N        | DE |
| 106388 | RM3405       | Canada       | 1980 |                 | N        | N        | RF |
| 106393 | RM3412       | Canada       | 1979 |                 | N        | N        |    |
| 108905 | KKC292       | USA          | 2018 | human stool     | N        | Y        |    |
| 111590 | CVM N17C578  | USA          | 2017 | chicken         | Y        | N        | DE |
| 111713 | R1S3-12      | Canada       | 2020 | broiler environ | Y        | N        |    |
| 111714 | R1S3-16      | Canada       | 2020 | broiler environ | Y        | N        |    |
| 111715 | R1S3-17A     | Canada       | 2020 | broiler environ | Y        | N        |    |
| 111716 | R1S3-17B     | Canada       | 2020 | broiler environ | Y        | N        |    |
| 111717 | R1S3-18A     | Canada       | 2020 | broiler environ | Y        | N        |    |
| 111718 | R1S3-18B     | Canada       | 2020 | broiler environ | Y        | N        |    |
| 111719 | R1S3-22      | Canada       | 2020 | broiler environ | Y        | N        |    |
| 111720 | R1S3-23B     | Canada       | 2020 | broiler environ | Y        | N        |    |
| 111728 | R1S3-W2A     | Canada       | 2020 | chicken         | <b>Y</b> | <b>N</b> |    |
| 2605   | H142940464   | UK [England] | 2014 | other animal    | Y        | N        |    |
| 2670   | H140620012   | UK [England] | 2014 | human stool     | Y        | N        |    |
| 2671   | H140940807   | UK [England] | 2014 | human stool     | Y        | N        |    |
| 5942   | OXC85        | UK [England] | 2003 | human stool     | N        | Y        |    |
| 5949   | OXC92        | UK [England] | 2003 | human stool     | Y        | Y        |    |
| 5955   | OXC98        | UK [England] | 2003 | human stool     | Y        | N        |    |
| 5963   | OXC106       | UK [England] | 2003 | human stool     | Y        | N        |    |
| 6001   | OXC144       | UK [England] | 2003 | human stool     | Y        | N        |    |
| 6016   | OXC159       | UK [England] | 2003 | human stool     | Y        | N        |    |
| 6022   | OXC165       | UK [England] | 2003 | human stool     | Y        | N        |    |
| 6056   | OXC199       | UK [England] | 2004 | human stool     | Y        | N        |    |
| 6103   | OXC246       | UK [England] | 2004 | human stool     | Y        | N        |    |
| 6158   | OXC301       | UK [England] | 2004 | human stool     | Y        | N        |    |
| 6189   | OXC332       | UK [England] | 2004 | human stool     | Y        | N        |    |
| 6192   | OXC335       | UK [England] | 2004 | human stool     | Y        | Y        |    |
| 6214   | OXC357       | UK [England] | 2004 | human stool     | N        | Y        |    |
| 6236   | OXC379       | UK [England] | 2004 | human stool     | Y        | Y        |    |
| 6237   | OXC380       | UK [England] | 2004 | human stool     | Y        | Y        |    |
| 6269   | OXC412       | UK [England] | 2004 | human stool     | Y        | N        |    |

|       |         |              |      |             |   |   |
|-------|---------|--------------|------|-------------|---|---|
| 6281  | OXC424  | UK [England] | 2004 | human stool | Y | N |
| 6310  | OXC453  | UK [England] | 2004 | human stool | Y | N |
| 6326  | OXC469  | UK [England] | 2004 | human stool | Y | N |
| 6415  | OXC558  | UK [England] | 2004 | human stool | N | N |
| 6463  | OXC606  | UK [England] | 2004 | human stool | Y | N |
| 12900 | OXC6565 | UK [England] | 2011 | human stool | N | N |
| 12906 | OXC6571 | UK [England] | 2011 | human stool | Y | Y |
| 14425 | OXC2061 | UK [England] | 2006 | human stool | Y | Y |
| 14452 | OXC2092 | UK [England] | 2006 | human stool | Y | Y |
| 14484 | OXC2129 | UK [England] | 2006 | human stool | Y | N |
| 14575 | OXC2284 | UK [England] | 2007 | human stool | Y | N |
| 14629 | OXC2368 | UK [England] | 2007 | human stool | N | N |
| 14645 | OXC2406 | UK [England] | 2007 | human stool | Y | Y |
| 14648 | OXC2409 | UK [England] | 2007 | human stool | Y | N |
| 14660 | OXC2422 | UK [England] | 2007 | human stool | Y | N |
| 14715 | OXC2498 | UK [England] | 2007 | human stool | Y | N |
| 14727 | OXC2512 | UK [England] | 2007 | human stool | Y | N |
| 14792 | OXC2595 | UK [England] | 2007 | human stool | Y | N |
| 14803 | OXC2608 | UK [England] | 2007 | human stool | N | N |
| 14856 | OXC2677 | UK [England] | 2007 | human stool | Y | Y |
| 14908 | OXC2746 | UK [England] | 2007 | human stool | Y | N |
| 14942 | OXC2790 | UK [England] | 2007 | human stool | Y | Y |
| 15841 | OXC4249 | UK [England] | 2009 | human stool | Y | N |
| 16063 | OXC6266 | UK [England] | 2011 | human stool | Y | Y |
| 16074 | OXC6277 | UK [England] | 2011 | human stool | N | N |
| 16083 | OXC6286 | UK [England] | 2011 | human stool | Y | Y |
| 16086 | OXC6289 | UK [England] | 2011 | human stool | Y | Y |
| 16089 | OXC6292 | UK [England] | 2011 | human stool | Y | Y |
| 16123 | OXC6326 | UK [England] | 2011 | human stool | Y | N |
| 16128 | OXC6331 | UK [England] | 2011 | human stool | Y | N |
| 16144 | OXC6347 | UK [England] | 2011 | human stool | Y | N |
| 16242 | OXC6449 | UK [England] | 2011 | human stool | Y | N |
| 16249 | OXC6457 | UK [England] | 2011 | human stool | Y | Y |
| 16251 | OXC6459 | UK [England] | 2011 | human stool | Y | N |
| 16253 | OXC6461 | UK [England] | 2011 | human stool | Y | N |
| 16281 | OXC6489 | UK [England] | 2011 | human stool | Y | N |
| 16285 | OXC6493 | UK [England] | 2011 | human stool | Y | N |
| 16294 | OXC6502 | UK [England] | 2011 | human stool | Y | N |
| 16316 | OXC6524 | UK [England] | 2011 | human stool | Y | N |
| 16319 | OXC6527 | UK [England] | 2011 | human stool | Y | N |
| 16322 | OXC6530 | UK [England] | 2011 | human stool | Y | N |
| 16323 | OXC6531 | UK [England] | 2011 | human stool | N | N |
| 16335 | OXC6543 | UK [England] | 2011 | human stool | Y | N |
| 16341 | OXC6590 | UK [England] | 2011 | human stool | Y | N |
| 16349 | OXC6598 | UK [England] | 2011 | human stool | N | N |
| 16351 | OXC6600 | UK [England] | 2011 | human stool | Y | N |
| 16363 | OXC6613 | UK [England] | 2011 | human stool | Y | N |

|       |         |              |      |             |      |   |
|-------|---------|--------------|------|-------------|------|---|
| 16365 | OXC6615 | UK [England] | 2011 | human stool | Y    | N |
| 16385 | OXC6636 | UK [England] | 2011 | human stool | Y    | N |
| 18221 | OXC6664 | UK [England] | 2011 | human stool | Y    | N |
| 18222 | OXC6665 | UK [England] | 2011 | human stool | Y    | N |
| 18223 | OXC6666 | UK [England] | 2011 | human stool | Y    | N |
| 18230 | OXC6673 | UK [England] | 2011 | human stool | Y    | N |
| 18234 | OXC6677 | UK [England] | 2011 | human stool | Y    | N |
| 18270 | OXC6713 | UK [England] | 2011 | human stool | Y    | N |
| 18271 | OXC6714 | UK [England] | 2011 | human stool | Y    | N |
| 18320 | OXC6763 | UK [England] | 2011 | human stool | Y    | N |
| 18377 | OXC6820 | UK [England] | 2012 | human stool | Y    | N |
| 18466 | OXC4776 | UK [England] | 2009 | human stool | Y    | N |
| 21106 | OXC6932 | UK [England] | 2012 | human stool | N    | N |
| 21120 | OXC6946 | UK [England] | 2012 | human stool | Y    | N |
| 21123 | OXC6949 | UK [England] | 2012 | human stool | Y    | N |
| 21130 | OXC6956 | UK [England] | 2012 | human stool | unk* | N |
| 21138 | OXC6964 | UK [England] | 2012 | human stool | Y    | Y |
| 21165 | OXC6994 | UK [England] | 2012 | human stool | Y    | N |
| 21213 | OXC7132 | UK [England] | 2012 | human stool | Y    | Y |
| 21317 | OXC5333 | UK [England] | 2010 | human stool | Y    | N |
| 21319 | OXC5335 | UK [England] | 2010 | human stool | Y    | Y |
| 21329 | OXC5349 | UK [England] | 2010 | human stool | Y    | Y |
| 21353 | OXC5393 | UK [England] | 2010 | human stool | Y    | N |
| 21368 | OXC5414 | UK [England] | 2010 | human stool | Y    | N |
| 21381 | OXC5435 | UK [England] | 2010 | human stool | Y    | Y |
| 21389 | OXC5445 | UK [England] | 2010 | human stool | Y    | N |
| 21390 | OXC5451 | UK [England] | 2010 | human stool | Y    | N |
| 21398 | OXC5462 | UK [England] | 2010 | human stool | Y    | N |
| 21414 | OXC5664 | UK [England] | 2010 | human stool | Y    | N |
| 21434 | OXC5691 | UK [England] | 2010 | human stool | N    | Y |
| 21453 | OXC5720 | UK [England] | 2010 | human stool | Y    | Y |
| 21457 | OXC5725 | UK [England] | 2010 | human stool | Y    | N |
| 21461 | OXC5731 | UK [England] | 2010 | human stool | Y    | N |
| 21487 | OXC5766 | UK [England] | 2011 | human stool | Y    | Y |
| 21491 | OXC5771 | UK [England] | 2011 | human stool | Y    | N |
| 21555 | OXC6836 | UK [England] | 2012 | human stool | Y    | N |
| 21579 | OXC6860 | UK [England] | 2012 | human stool | Y    | N |
| 21580 | OXC6861 | UK [England] | 2012 | human stool | Y    | N |
| 21584 | OXC6865 | UK [England] | 2012 | human stool | Y    | Y |
| 21587 | OXC6868 | UK [England] | 2012 | human stool | Y    | N |
| 22095 | OXC6900 | UK [England] | 2012 | human stool | Y    | Y |
| 22117 | OXC6922 | UK [England] | 2012 | human stool | Y    | N |
| 22138 | OXC4797 | UK [England] | 2010 | human stool | Y    | N |
| 22141 | OXC4801 | UK [England] | 2010 | human stool | Y    | N |
| 22144 | OXC4807 | UK [England] | 2010 | human stool | Y    | N |
| 22182 | OXC4877 | UK [England] | 2010 | human stool | Y    | N |
| 22185 | OXC4880 | UK [England] | 2010 | human stool | Y    | N |

|       |            |              |      |             |     |   |
|-------|------------|--------------|------|-------------|-----|---|
| 22202 | OXC7015    | UK [England] | 2012 | human stool | Y   | N |
| 22207 | OXC7020    | UK [England] | 2012 | human stool | Y   | N |
| 22215 | OXC7029    | UK [England] | 2012 | human stool | Y   | N |
| 22226 | OXC7041    | UK [England] | 2012 | human stool | Y   | N |
| 22249 | OXC7065    | UK [England] | 2012 | human stool | unk | Y |
| 22255 | OXC7071    | UK [England] | 2012 | human stool | Y   | N |
| 22264 | OXC7080    | UK [England] | 2012 | human stool | Y   | N |
| 22288 | OXC7246    | UK [England] | 2012 | human stool | Y   | Y |
| 22301 | OXC7260    | UK [England] | 2012 | human stool | Y   | N |
| 22305 | OXC7264    | UK [England] | 2012 | human stool | Y   | N |
| 22311 | OXC7270    | UK [England] | 2012 | human stool | Y   | Y |
| 22334 | OXC7293    | UK [England] | 2012 | human stool | Y   | N |
| 22343 | OXC7302    | UK [England] | 2012 | human stool | Y   | N |
| 22346 | OXC7305    | UK [England] | 2012 | human stool | Y   | N |
| 22679 | OXC7188    | UK [England] | 2012 | human stool | Y   | N |
| 22705 | OXC7214    | UK [England] | 2012 | human stool | Y   | Y |
| 22711 | OXC7220    | UK [England] | 2012 | human stool | Y   | N |
| 23514 | OXC5628    | UK [England] | 2010 | human stool | Y   | Y |
| 23534 | OXC5651    | UK [England] | 2010 | human stool | Y   | N |
| 23549 | OXC5799    | UK [England] | 2011 | human stool | Y   | N |
| 23575 | OXC5829    | UK [England] | 2011 | human stool | Y   | Y |
| 23612 | OXC5879    | UK [England] | 2011 | human stool | Y   | Y |
| 23631 | OXC5905    | UK [England] | 2011 | human stool | Y   | N |
| 23632 | OXC5906    | UK [England] | 2011 | human stool | Y   | N |
| 23647 | OXC5925    | UK [England] | 2011 | human stool | Y   | N |
| 23648 | OXC5926    | UK [England] | 2011 | human stool | Y   | N |
| 23677 | OXC5902    | UK [England] | 2011 | human stool | Y   | Y |
| 23889 | OXC7349    | UK [England] | 2012 | human stool | Y   | N |
| 23901 | OXC7362    | UK [England] | 2012 | human stool | Y   | N |
| 23951 | OXC7417    | UK [England] | 2012 | human stool | Y   | N |
| 23961 | OXC7428    | UK [England] | 2012 | human stool | Y   | N |
| 24006 | OXC7477    | UK [England] | 2012 | human stool | Y   | Y |
| 24010 | OXC7481    | UK [England] | 2012 | human stool | Y   | N |
| 24016 | OXC7488    | UK [England] | 2012 | human stool | Y   | N |
| 24026 | OXC7499    | UK [England] | 2012 | human stool | Y   | Y |
| 24037 | OXC7512    | UK [England] | 2012 | human stool | Y   | Y |
| 24044 | OXC4567    | UK [England] | 2009 | human stool | Y   | Y |
| 24052 | OXC4578    | UK [England] | 2009 | human stool | Y   | N |
| 24061 | OXC4590    | UK [England] | 2009 | human stool | Y   | N |
| 24068 | OXC4600    | UK [England] | 2009 | human stool | Y   | Y |
| 24078 | OXC4628    | UK [England] | 2009 | human stool | N   | N |
| 24119 | OXC7514    | UK [England] | 2012 | human stool | Y   | Y |
| 24133 | OXC7529    | UK [England] | 2012 | human stool | Y   | Y |
| 24312 | CJ6946_R   | UK [England] |      |             | Y   | N |
| 24319 | ARI_916_R  | UK           |      |             | Y   | Y |
| 24325 | ARI_1130_R | UK           |      |             | Y   | N |
| 24342 | CJ7015_R   | UK [England] |      |             | Y   | N |

|       |         |              |      |             |   |   |
|-------|---------|--------------|------|-------------|---|---|
| 24478 | OXC7535 | UK [England] | 2012 | human stool | Y | Y |
| 24536 | OXC7606 | UK [England] | 2012 | human stool | Y | N |
| 24542 | OXC7613 | UK [England] | 2012 | human stool | Y | N |
| 24543 | OXC7614 | UK [England] | 2012 | human stool | Y | N |
| 24556 | OXC7627 | UK [England] | 2012 | human stool | Y | N |
| 24566 | OXC7637 | UK [England] | 2012 | human stool | Y | N |
| 24568 | OXC7639 | UK [England] | 2012 | human stool | Y | Y |
| 24608 | OXC7810 | UK [England] | 2013 | human stool | Y | N |
| 24632 | OXC7835 | UK [England] | 2013 | human stool | Y | N |
| 24633 | OXC7836 | UK [England] | 2013 | human stool | Y | N |
| 24634 | OXC7837 | UK [England] | 2013 | human stool | Y | N |
| 24642 | OXC7845 | UK [England] | 2013 | human stool | Y | N |
| 24684 | OXC5010 | UK [England] | 2010 | human stool | N | N |
| 24708 | OXC5045 | UK [England] | 2010 | human stool | Y | N |
| 24711 | OXC5049 | UK [England] | 2010 | human stool | Y | Y |
| 24733 | OXC5094 | UK [England] | 2010 | human stool | Y | N |
| 24753 | OXC5131 | UK [England] | 2010 | human stool | Y | N |
| 24770 | OXC5169 | UK [England] | 2010 | human stool | Y | N |
| 24898 | OXC7641 | UK [England] | 2012 | human stool | N | N |
| 24902 | OXC7645 | UK [England] | 2012 | human stool | Y | N |
| 24912 | OXC7657 | UK [England] | 2012 | human stool | Y | N |
| 24915 | OXC7660 | UK [England] | 2012 | human stool | Y | Y |
| 24924 | OXC7669 | UK [England] | 2012 | human stool | Y | N |
| 24925 | OXC7670 | UK [England] | 2012 | human stool | Y | Y |
| 24943 | OXC7695 | UK [England] | 2012 | human stool | Y | N |
| 24947 | OXC7699 | UK [England] | 2012 | human stool | Y | Y |
| 24958 | OXC7716 | UK [England] | 2013 | human stool | Y | Y |
| 24962 | OXC7720 | UK [England] | 2013 | human stool | Y | N |
| 24981 | OXC7746 | UK [England] | 2013 | human stool | Y | N |
| 24989 | OXC7854 | UK [England] | 2013 | human stool | Y | N |
| 25001 | OXC7866 | UK [England] | 2013 | human stool | Y | Y |
| 25002 | OXC7867 | UK [England] | 2013 | human stool | Y | N |
| 25006 | OXC7871 | UK [England] | 2013 | human stool | Y | N |
| 25093 | OXC4930 | UK [England] | 2010 | human stool | Y | N |
| 25112 | OXC7805 | UK [England] | 2013 | human stool | Y | N |
| 25117 | OXC7930 | UK [England] | 2013 | human stool | Y | N |
| 25381 | OXC7966 | UK [England] | 2013 | human stool | Y | Y |
| 25409 | OXC8022 | UK [England] | 2013 | human stool | Y | Y |
| 25464 | OXC8138 | UK [England] | 2013 | human stool | Y | N |
| 25478 | OXC7958 | UK [England] | 2013 | human stool | Y | N |
| 25479 | OXC7961 | UK [England] | 2013 | human stool | Y | N |
| 25513 | OXC8063 | UK [England] | 2013 | human stool | Y | N |
| 25520 | OXC8082 | UK [England] | 2013 | human stool | Y | N |
| 25527 | OXC8099 | UK [England] | 2013 | human stool | Y | N |
| 25530 | OXC8103 | UK [England] | 2013 | human stool | Y | N |
| 25569 | OXC7949 | UK [England] | 2013 | human stool | Y | N |
| 25585 | OXC8015 | UK [England] | 2013 | human stool | Y | N |

|       |         |              |      |              |     |   |
|-------|---------|--------------|------|--------------|-----|---|
| 25645 | OXC8183 | UK [England] | 2013 | human stool  | Y   | N |
| 25854 | E60490  | Luxembourg   | 2006 | cattle       | Y   | N |
| 26041 | Dg370   | UK           |      | other animal | Y   | Y |
| 27866 | OXC7714 | UK [England] | 2013 | human stool  | Y   | Y |
| 27868 | OXC7740 | UK [England] | 2013 | human stool  | Y   | N |
| 27869 | OXC7753 | UK [England] | 2013 | human stool  | Y   | N |
| 27884 | OXC7804 | UK [England] | 2013 | human stool  | Y   | N |
| 27897 | OXC8192 | UK [England] | 2013 | human stool  | Y   | Y |
| 27902 | OXC8197 | UK [England] | 2013 | human stool  | Y   | N |
| 27929 | OXC8227 | UK [England] | 2013 | human stool  | Y   | N |
| 27932 | OXC8230 | UK [England] | 2013 | human stool  | Y   | Y |
| 27933 | OXC8231 | UK [England] | 2013 | human stool  | Y   | N |
| 27952 | OXC8254 | UK [England] | 2013 | human stool  | Y   | Y |
| 27955 | OXC8257 | UK [England] | 2013 | human stool  | Y   | Y |
| 27960 | OXC8264 | UK [England] | 2013 | human stool  | Y   | N |
| 27971 | OXC8278 | UK [England] | 2013 | human stool  | Y   | Y |
| 27974 | OXC8282 | UK [England] | 2013 | human stool  | N   | N |
| 27982 | OXC8291 | UK [England] | 2013 | human stool  | N   | N |
| 27987 | OXC8296 | UK [England] | 2013 | human stool  | Y   | N |
| 27992 | OXC8301 | UK [England] | 2013 | human stool  | Y   | N |
| 27993 | OXC8302 | UK [England] | 2013 | human stool  | Y   | N |
| 28011 | OXC8320 | UK [England] | 2013 | human stool  | Y   | N |
| 28016 | OXC8325 | UK [England] | 2013 | human stool  | Y   | Y |
| 28022 | OXC8331 | UK [England] | 2013 | human stool  | Y   | Y |
| 28026 | OXC8335 | UK [England] | 2013 | human stool  | Y   | N |
| 28033 | OXC8342 | UK [England] | 2013 | human stool  | Y   | N |
| 28047 | OXC8359 | UK [England] | 2013 | human stool  | Y   | N |
| 28054 | OXC8367 | UK [England] | 2013 | human stool  | Y   | N |
| 28567 | OXC8364 | UK [England] | 2013 | human stool  | Y   | Y |
| 28569 | OXC8368 | UK [England] | 2013 | human stool  | Y   | Y |
| 28572 | OXC8379 | UK [England] | 2013 | human stool  | Y   | N |
| 28574 | OXC8381 | UK [England] | 2013 | human stool  | Y   | N |
| 28618 | OXC8427 | UK [England] | 2013 | human stool  | unk | N |
| 28646 | OXC8455 | UK [England] | 2013 | human stool  | Y   | N |
| 28647 | OXC8456 | UK [England] | 2013 | human stool  | Y   | N |
| 28648 | OXC8457 | UK [England] | 2013 | human stool  | Y   | N |
| 28654 | OXC8462 | UK [England] | 2013 | human stool  | N   | N |
| 28665 | OXC8472 | UK [England] | 2013 | human stool  | Y   | N |
| 28671 | OXC8478 | UK [England] | 2013 | human stool  | Y   | N |
| 28691 | OXC8500 | UK [England] | 2013 | human stool  | Y   | N |
| 28692 | OXC8501 | UK [England] | 2013 | human stool  | Y   | N |
| 28693 | OXC8502 | UK [England] | 2013 | human stool  | Y   | N |
| 28705 | OXC8514 | UK [England] | 2013 | human stool  | Y   | N |
| 28719 | OXC8528 | UK [England] | 2013 | human stool  | Y   | N |
| 28729 | OXC8539 | UK [England] | 2013 | human stool  | Y   | N |
| 28731 | OXC8541 | UK [England] | 2013 | human stool  | N   | N |
| 28874 | E110057 | Luxembourg   | 2011 | waters       | Y   | Y |

|       |            |              |      |             |   |   |
|-------|------------|--------------|------|-------------|---|---|
| 28875 | E120350    | Luxembourg   | 2012 | waters      | Y | Y |
| 28876 | C101794    | Luxembourg   | 2010 | human stool | Y | Y |
| 28878 | C120949    | Luxembourg   | 2012 | chicken     | Y | Y |
| 28879 | C121664    | Luxembourg   | 2012 | human stool | Y | Y |
| 28880 | C130520    | Luxembourg   | 2013 | cattle      | Y | Y |
| 28896 | OXC8699    | UK [England] | 2014 | human stool | Y | N |
| 28903 | OXC8564    | UK [England] | 2013 | human stool | Y | N |
| 28922 | OXC8586    | UK [England] | 2013 | human stool | Y | N |
| 28942 | OXC8614    | UK [England] | 2014 | human stool | Y | N |
| 28960 | OXC8646    | UK [England] | 2014 | human stool | Y | N |
| 28972 | OXC8658    | UK [England] | 2014 | human stool | Y | N |
| 28974 | OXC8318R   | UK [England] | 2013 | human stool | Y | Y |
| 28981 | OXC8405    | UK [England] | 2013 | human stool | Y | N |
| 28989 | OXC8620    | UK [England] | 2014 | human stool | Y | N |
| 29000 | OXC8665    | UK [England] | 2014 | human stool | Y | N |
| 29052 | OXC8727    | UK [England] | 2014 | human stool | Y | N |
| 29067 | OXC8405R   | UK [England] | 2013 | human stool | Y | N |
| 29309 | OXC6106    | UK [England] | 2011 | human stool | Y | Y |
| 29453 | H140940806 | UK [England] | 2014 | human stool | Y | N |
| 29625 | OXC5409    | UK [England] | 2010 | human stool | Y | Y |
| 29681 | OXC5935    | UK [England] | 2011 | human stool | Y | N |
| 30423 | OXC9004    | UK [England] | 2014 | human stool | Y | N |
| 30424 | OXC8884    | UK [England] | 2014 | human stool | Y | Y |
| 30434 | OXC8743    | UK [England] | 2014 | human stool | Y | N |
| 30440 | OXC8749    | UK [England] | 2014 | human stool | Y | N |
| 30472 | OXC8783    | UK [England] | 2014 | human stool | Y | N |
| 30474 | OXC8785    | UK [England] | 2014 | human stool | Y | N |
| 30540 | OXC8854    | UK [England] | 2014 | human stool | Y | Y |
| 30553 | OXC8867    | UK [England] | 2014 | human stool | Y | N |
| 30569 | OXC8885    | UK [England] | 2014 | human stool | Y | Y |
| 30582 | OXC8899    | UK [England] | 2014 | human stool | Y | N |
| 30584 | OXC8901    | UK [England] | 2014 | human stool | Y | Y |
| 30595 | OXC8912    | UK [England] | 2014 | human stool | Y | Y |
| 30605 | OXC8922    | UK [England] | 2014 | human stool | Y | N |
| 30660 | OXC8978    | UK [England] | 2014 | human stool | Y | N |
| 30700 | OXC9021    | UK [England] | 2014 | human stool | Y | Y |
| 30711 | OXC9032    | UK [England] | 2014 | human stool | Y | N |
| 30714 | OXC9035    | UK [England] | 2014 | human stool | Y | N |
| 30757 | OXC9078    | UK [England] | 2014 | human stool | Y | N |
| 30798 | OXC9119    | UK [England] | 2014 | human stool | Y | N |
| 30812 | OXC9133    | UK [England] | 2014 | human stool | Y | N |
| 30836 | OXC9157    | UK [England] | 2014 | human stool | Y | Y |
| 30852 | OXC9173    | UK [England] | 2014 | human stool | Y | N |
| 30855 | OXC9176    | UK [England] | 2014 | human stool | Y | Y |
| 30861 | OXC9182    | UK [England] | 2014 | human stool | Y | Y |
| 30870 | OXC9191    | UK [England] | 2014 | human stool | Y | N |
| 30933 | OXC9260    | UK [England] | 2014 | human stool | Y | N |

|       |            |              |      |             |   |   |
|-------|------------|--------------|------|-------------|---|---|
| 30975 | OXC9302    | UK [England] | 2014 | human stool | Y | N |
| 31017 | OXC8756    | UK [England] | 2014 | human stool | Y | Y |
| 31023 | OXC8831    | UK [England] | 2014 | human stool | Y | N |
| 31052 | OXC8966    | UK [England] | 2014 | human stool | Y | N |
| 31062 | OXC8980    | UK [England] | 2014 | human stool | Y | N |
| 31066 | OXC8984    | UK [England] | 2014 | human stool | Y | N |
| 31089 | OXC8992    | UK [England] | 2014 | human stool | Y | Y |
| 31129 | H144320568 | UK [England] | 2014 | human stool | Y | N |
| 31137 | OXC9318    | UK [England] | 2014 | human stool | Y | N |
| 31147 | OXC9328    | UK [England] | 2014 | human stool | Y | N |
| 31148 | OXC9329    | UK [England] | 2014 | human stool | Y | N |
| 31149 | OXC9330    | UK [England] | 2014 | human stool | Y | N |
| 31171 | OXC9352    | UK [England] | 2014 | human stool | Y | N |
| 31194 | OXC9375    | UK [England] | 2014 | human stool | Y | N |
| 31241 | OXC9422    | UK [England] | 2015 | human stool | Y | N |
| 31259 | OXC9440    | UK [England] | 2015 | human stool | Y | N |
| 31265 | OXC9446    | UK [England] | 2015 | human stool | Y | N |
| 31272 | OXC9453    | UK [England] | 2015 | human stool | Y | N |
| 31277 | OXC9458    | UK [England] | 2015 | human stool | Y | N |
| 31279 | OXC9460    | UK [England] | 2015 | human stool | Y | N |
| 31283 | OXC9464    | UK [England] | 2015 | human stool | Y | N |
| 31296 | OXC9477    | UK [England] | 2015 | human stool | Y | N |
| 31305 | OXC9486    | UK [England] | 2015 | human stool | Y | N |
| 31312 | OXC9493    | UK [England] | 2015 | human stool | Y | N |
| 31323 | OXC9504    | UK [England] | 2015 | human stool | Y | N |
| 31326 | OXC9507    | UK [England] | 2015 | human stool | Y | N |
| 31333 | OXC9514    | UK [England] | 2015 | human stool | Y | N |
| 31356 | OXC9537    | UK [England] | 2015 | human stool | Y | N |
| 31384 | OXC9565    | UK [England] | 2015 | human stool | Y | N |
| 31387 | OXC9568    | UK [England] | 2015 | human stool | Y | N |
| 31390 | OXC9571    | UK [England] | 2015 | human stool | Y | N |
| 31397 | OXC9578    | UK [England] | 2015 | human stool | Y | N |
| 31402 | OXC9583    | UK [England] | 2015 | human stool | Y | N |
| 31403 | OXC9584    | UK [England] | 2015 | human stool | Y | N |
| 31404 | OXC9585    | UK [England] | 2015 | human stool | Y | N |
| 31418 | OXC9599    | UK [England] | 2015 | human stool | Y | N |
| 31438 | OXC9619    | UK [England] | 2015 | human stool | Y | N |
| 31439 | OXC9620    | UK [England] | 2015 | human stool | N | N |
| 31461 | OXC9642    | UK [England] | 2015 | human stool | Y | N |
| 31462 | OXC9643    | UK [England] | 2015 | human stool | Y | N |
| 31478 | OXC9659    | UK [England] | 2015 | human stool | Y | N |
| 31492 | OXC9673    | UK [England] | 2015 | human stool | Y | N |
| 31566 | H145020743 | UK [England] | 2014 | human stool | Y | N |
| 31862 | 5B         | Denmark      | 2015 |             | Y | N |
| 31864 | MP18       | Denmark      | 2015 |             | Y | N |
| 32544 | H150620634 | UK [England] | 2015 | human stool | Y | N |
| 32570 | H150820519 | UK           | 2015 |             | Y | N |



|       |             |               |      |              |   |   |
|-------|-------------|---------------|------|--------------|---|---|
| 32573 | H150820523  | UK            | 2015 |              | Y | N |
| 32588 | H150920714  | UK [England]  | 2015 | human stool  | Y | Y |
| 32590 | H150920716  | UK [England]  | 2015 | human stool  | Y | N |
| 32596 | H151020734  | UK [England]  | 2015 |              | Y | N |
| 32707 | H151160574  | UK            | 2015 |              | Y | N |
| 32775 | OXC9719     | UK [England]  | 2015 | human stool  | Y | Y |
| 32810 | OXC9754     | UK [England]  | 2015 | human stool  | Y | N |
| 32853 | OXC9797     | UK [England]  | 2015 | human stool  | Y | Y |
| 32854 | OXC9798     | UK [England]  | 2015 | human stool  | Y | Y |
| 32855 | OXC9799     | UK [England]  | 2015 | human stool  | Y | N |
| 32866 | OXC9810     | UK [England]  | 2015 | human stool  | Y | N |
| 32893 | OXC9837     | UK [England]  | 2015 | human stool  | Y | Y |
| 32901 | OXC9845     | UK [England]  | 2015 | human stool  | Y | N |
| 32935 | OXC9879     | UK [England]  | 2015 | human stool  | Y | N |
| 33086 | H151220565  | UK            | 2015 |              | Y | N |
| 33087 | H151220566  | UK            | 2015 |              | Y | N |
| 33096 | H151340582  | UK [England]  | 2015 | human stool  | Y | N |
| 33133 | OXC6187X    | UK [England]  | 2011 | human stool  | Y | N |
| 33278 | RL15000562  | UK            |      |              | Y | N |
| 33286 | H151920575  | UK [England]  | 2015 | human stool  | Y | N |
| 33289 | H151920579  | UK [England]  | 2015 | human stool  | Y | Y |
| 33914 | H152040481  | UK            | 2015 |              | Y | Y |
| 33917 | H152040485  | UK            | 2015 |              | Y | Y |
| 33989 | H150460541  | UK            | 2015 |              | Y | N |
| 34058 | H152580498  | UK            | 2015 |              | Y | N |
| 34061 | H151020732  | UK [England]  | 2015 |              | Y | N |
| 34149 | H121820083  | Jersey        | 2012 | human stool  | Y | Y |
| 34152 | H122580779  | UK            | 2012 |              | Y | N |
| 34160 | H133640222  | UK [England]  | 2013 | human stool  | Y | N |
| 34161 | H133640223  | UK [England]  | 2013 | human stool  | Y | N |
| 34162 | H133640225  | UK [England]  | 2013 | human stool  | Y | N |
| 34163 | H133640226  | UK [England]  | 2013 | human stool  | Y | N |
| 34164 | H133640228  | UK [England]  | 2013 | human stool  | Y | N |
| 34175 | H140740343  | UK [England]  | 2014 | human stool  | Y | N |
| 34433 | OXC9901     | UK [England]  | 2015 | human stool  | Y | N |
| 34481 | OXC9949     | UK [England]  | 2015 | human stool  | Y | N |
| 34507 | OXC9975     | UK [England]  | 2015 | human stool  | Y | N |
| 34511 | OXC9979     | UK [England]  | 2015 | human stool  | Y | N |
| 35296 | Cj2008-1025 | France        |      | human        | Y | N |
| 35302 | Cj2008-831  | France        |      | human        | Y | N |
| 37259 | Seal113     | UK [Scotland] | 2011 | other animal | Y | N |
| 37566 | Seal174     | UK [Scotland] | 2011 | other animal | Y | N |
| 37569 | Seal181     | UK [Scotland] | 2011 | other animal | Y | N |
| 37570 | Seal183     | UK [Scotland] | 2011 | other animal | Y | N |
| 37590 | Seal48      | UK [Scotland] | 2011 | other animal | Y | N |
| 37594 | Seal56      | UK [Scotland] | 2011 | other animal | Y | N |
| 37606 | Seal82      | UK [Scotland] | 2011 | other animal | Y | N |

|       |           |               |      |              |   |   |
|-------|-----------|---------------|------|--------------|---|---|
| 37608 | Seal87    | UK [Scotland] | 2011 | other animal | Y | N |
| 38423 | ARI1491   | UK [Scotland] | 2012 | human stool  | Y | N |
| 38427 | ARI1495   | UK [Scotland] | 2012 | human stool  | Y | N |
| 38439 | ARI1507   | UK [Scotland] | 2012 | human stool  | Y | Y |
| 38442 | ARI1511   | UK [Scotland] | 2012 | human stool  | Y | N |
| 38451 | ARI1521   | UK [Scotland] | 2012 | human stool  | Y | N |
| 38462 | ARI1533   | UK [Scotland] | 2012 | human stool  | Y | Y |
| 38486 | ARI1562   | UK [Scotland] | 2012 | human stool  | Y | N |
| 38490 | ARI1566   | UK [Scotland] | 2012 | human stool  | Y | N |
| 38491 | ARI1567   | UK [Scotland] | 2012 | human stool  | Y | N |
| 38506 | ARI1583   | UK [Scotland] | 2012 | human stool  | Y | N |
| 38508 | ARI1585   | UK [Scotland] | 2012 | human stool  | Y | N |
| 38529 | ARI1607   | UK [Scotland] | 2012 | human stool  | Y | N |
| 38574 | ARI1664   | UK [Scotland] | 2012 | human stool  | Y | N |
| 38616 | ARI1713   | UK [Scotland] | 2012 | human stool  | Y | N |
| 38654 | ARI1757   | UK [Scotland] | 2012 | human stool  | Y | N |
| 38684 | ARI1790   | UK [Scotland] | 2012 | human stool  | Y | N |
| 38706 | ARI1814   | UK [Scotland] | 2012 | human stool  | Y | N |
| 38708 | ARI1816   | UK [Scotland] | 2012 | human stool  | Y | N |
| 38716 | ARI1824   | UK [Scotland] | 2012 | human stool  | Y | Y |
| 38735 | ARI1847   | UK [Scotland] | 2012 | human stool  | Y | Y |
| 38761 | ARI1875   | UK [Scotland] | 2012 | human stool  | Y | N |
| 38780 | ARI1894   | UK [Scotland] | 2012 | human stool  | Y | N |
| 38781 | ARI1895   | UK [Scotland] | 2012 | human stool  | Y | N |
| 38782 | ARI1896   | UK [Scotland] | 2012 | human stool  | Y | N |
| 38812 | ARI1927   | UK [Scotland] | 2012 | human stool  | Y | Y |
| 38825 | ARI1940   | UK [Scotland] | 2012 | human stool  | Y | Y |
| 38833 | ARI1949   | UK [Scotland] | 2012 | human stool  | Y | N |
| 38872 | ARI1991   | UK [Scotland] | 2012 | human stool  | Y | Y |
| 38884 | ARI2003_1 | UK [Scotland] | 2012 | human stool  | Y | Y |
| 38896 | ARI2015_1 | UK [Scotland] | 2012 | human stool  | Y | N |
| 38935 | ARI2054   | UK [Scotland] | 2012 | human stool  | Y | Y |
| 38949 | ARI2068_1 | UK [Scotland] | 2012 | human stool  | Y | N |
| 38968 | ARI2088_1 | UK [Scotland] | 2012 | human stool  | Y | N |
| 38973 | ARI2093_1 | UK [Scotland] | 2012 | human stool  | Y | N |
| 38982 | ARI2103_1 | UK [Scotland] | 2012 | human stool  | Y | N |
| 38984 | ARI2105_1 | UK [Scotland] | 2012 | human stool  | N | N |
| 38985 | ARI2106_1 | UK [Scotland] | 2012 | human stool  | Y | N |
| 38994 | ARI2115_1 | UK [Scotland] | 2012 | human stool  | Y | Y |
| 39024 | ARI2147   | UK [Scotland] | 2012 | human stool  | Y | N |
| 39038 | ARI2161_1 | UK [Scotland] | 2012 | human stool  | Y | N |
| 39064 | ARI2187   | UK [Scotland] | 2012 | human stool  | Y | N |
| 39072 | ARI2195   | UK [Scotland] | 2012 | human stool  | Y | N |
| 39076 | ARI2199   | UK [Scotland] | 2012 | human stool  | Y | Y |
| 39082 | ARI2205   | UK [Scotland] | 2012 | human stool  | Y | N |
| 39089 | ARI2212   | UK [Scotland] | 2012 | human stool  | Y | N |
| 39095 | ARI2218   | UK [Scotland] | 2012 | human stool  | Y | Y |

|       |         |               |      |             |   |   |
|-------|---------|---------------|------|-------------|---|---|
| 39105 | ARI2228 | UK [Scotland] | 2012 | human stool | Y | N |
| 39106 | ARI2229 | UK [Scotland] | 2012 | human stool | Y | N |
| 39114 | ARI2241 | UK [Scotland] | 2013 | human stool | Y | N |
| 39138 | ARI2289 | UK [Scotland] | 2013 | human stool | Y | N |
| 39179 | ARI2348 | UK [Scotland] | 2013 | human stool | Y | Y |
| 39184 | ARI2355 | UK [Scotland] | 2013 | human stool | Y | N |
| 39197 | ARI2371 | UK [Scotland] | 2013 | human stool | Y | N |
| 39200 | ARI2376 | UK [Scotland] | 2013 | human stool | Y | Y |
| 39201 | ARI2377 | UK [Scotland] | 2013 | human stool | Y | Y |
| 39212 | ARI2392 | UK [Scotland] | 2013 | human stool | Y | N |
| 39219 | ARI2399 | UK [Scotland] | 2013 | human stool | Y | N |
| 39268 | ARI2455 | UK [Scotland] | 2013 | human stool | Y | N |
| 39274 | ARI2464 | UK [Scotland] | 2013 | human stool | Y | N |
| 39280 | ARI2471 | UK [Scotland] | 2013 | human stool | Y | N |
| 39286 | ARI2481 | UK [Scotland] | 2013 | human stool | Y | Y |
| 39330 | ARI2525 | UK [Scotland] | 2013 | human stool | Y | N |
| 39368 | ARI2575 | UK [Scotland] | 2013 | human stool | Y | N |
| 39378 | ARI2588 | UK [Scotland] | 2013 | human stool | Y | N |
| 39380 | ARI2590 | UK [Scotland] | 2013 | human stool | Y | N |
| 39388 | ARI2598 | UK [Scotland] | 2013 | human stool | Y | N |
| 39392 | ARI2603 | UK [Scotland] | 2013 | human stool | Y | N |
| 39417 | ARI2629 | UK [Scotland] | 2013 | human stool | Y | N |
| 39454 | ARI2666 | UK [Scotland] | 2013 | human stool | Y | N |
| 39485 | ARI2700 | UK [Scotland] | 2013 | human stool | N | N |
| 39488 | ARI2703 | UK [Scotland] | 2013 | human stool | Y | N |
| 39493 | ARI2708 | UK [Scotland] | 2013 | human stool | Y | N |
| 39494 | ARI2709 | UK [Scotland] | 2013 | human stool | Y | N |
| 39506 | ARI2722 | UK [Scotland] | 2013 | human stool | Y | Y |
| 39515 | ARI2731 | UK [Scotland] | 2013 | human stool | Y | Y |
| 39521 | ARI2737 | UK [Scotland] | 2013 | human stool | Y | N |
| 39527 | ARI2743 | UK [Scotland] | 2013 | human stool | Y | N |
| 39546 | ARI2762 | UK [Scotland] | 2013 | human stool | Y | N |
| 39551 | ARI2767 | UK [Scotland] | 2013 | human stool | Y | N |
| 39573 | ARI2789 | UK [Scotland] | 2013 | human stool | Y | N |
| 39588 | ARI2804 | UK [Scotland] | 2013 | human stool | Y | N |
| 39637 | ARI2853 | UK [Scotland] | 2013 | human stool | Y | Y |
| 39640 | ARI2856 | UK [Scotland] | 2013 | human stool | Y | N |
| 39643 | ARI2859 | UK [Scotland] | 2013 | human stool | Y | Y |
| 39659 | ARI2877 | UK [Scotland] | 2013 | human stool | Y | N |
| 39670 | ARI2888 | UK [Scotland] | 2013 | human stool | Y | N |
| 39691 | ARI2910 | UK [Scotland] | 2013 | human stool | Y | N |
| 39698 | ARI2917 | UK [Scotland] | 2013 | human stool | Y | N |
| 39707 | ARI2926 | UK [Scotland] | 2013 | human stool | Y | N |
| 39737 | B0050   | UK [Scotland] | 2013 | cattle      | Y | Y |
| 39812 | C0476   | UK [Scotland] | 2013 | chicken     | Y | Y |
| 39816 | C0481   | UK [Scotland] | 2013 | chicken     | Y | Y |
| 39821 | C0487   | UK [Scotland] | 2013 | chicken     | Y | Y |

|       |         |               |      |             |   |   |
|-------|---------|---------------|------|-------------|---|---|
| 39827 | C0496   | UK [Scotland] | 2013 | chicken     | N | N |
| 39830 | C0502   | UK [Scotland] | 2013 | chicken     | Y | Y |
| 39832 | C0504   | UK [Scotland] | 2013 | chicken     | Y | N |
| 39843 | C0523   | UK [Scotland] | 2013 | turkey      | Y | N |
| 39875 | C0584   | UK [Scotland] | 2013 | chicken     | Y | Y |
| 39877 | C0586   | UK [Scotland] | 2013 | chicken     | Y | Y |
| 39882 | C0592   | UK [Scotland] | 2013 | chicken     | Y | N |
| 39897 | C0607   | UK [Scotland] | 2013 | chicken     | Y | Y |
| 39916 | C0629   | UK [Scotland] | 2013 | chicken     | Y | Y |
| 39927 | C0647   | UK [Scotland] | 2013 | chicken     | Y | Y |
| 39951 | C0676   | UK [Scotland] | 2013 | chicken     | Y | N |
| 39963 | C0688   | UK [Scotland] | 2013 | chicken     | Y | N |
| 39971 | C0700   | UK [Scotland] | 2013 | chicken     | Y | N |
| 39972 | C0701   | UK [Scotland] | 2013 | chicken     | Y | N |
| 39974 | C0704   | UK [Scotland] | 2013 | chicken     | Y | N |
| 40270 | ARI2252 | UK [Scotland] | 2013 | human stool | Y | N |
| 40282 | ARI2276 | UK [Scotland] | 2013 | human stool | Y | N |
| 40291 | ARI2296 | UK [Scotland] | 2013 | human stool | Y | N |
| 40292 | ARI2297 | UK [Scotland] | 2013 | human stool | Y | N |
| 40296 | ARI2312 | UK [Scotland] | 2013 | human stool | Y | N |
| 40317 | ARI2435 | UK [Scotland] | 2013 | human stool | Y | N |
| 40321 | ARI2457 | UK [Scotland] | 2013 | human stool | Y | N |
| 40331 | ARI2941 | UK [Scotland] | 2013 | human stool | Y | N |
| 40357 | ARI2972 | UK [Scotland] | 2013 | human stool | Y | N |
| 40359 | ARI2974 | UK [Scotland] | 2013 | human stool | Y | N |
| 40361 | ARI2976 | UK [Scotland] | 2013 | human stool | Y | N |
| 40366 | ARI2981 | UK [Scotland] | 2013 | human stool | Y | N |
| 40372 | ARI2987 | UK [Scotland] | 2013 | human stool | Y | N |
| 40398 | ARI3076 | UK [Scotland] | 2013 | human stool | Y | N |
| 40403 | ARI3084 | UK [Scotland] | 2013 | human stool | Y | N |
| 40414 | ARI3107 | UK [Scotland] | 2014 | human stool | Y | N |
| 40464 | C0563   | UK [Scotland] | 2013 | chicken     | Y | Y |
| 40487 | C0751   | UK [Scotland] | 2013 | chicken     | Y | N |
| 40490 | C0754   | UK [Scotland] | 2013 | chicken     | Y | N |
| 40491 | C0755   | UK [Scotland] | 2013 | chicken     | Y | N |
| 40493 | C0757   | UK [Scotland] | 2013 | chicken     | Y | N |
| 40507 | C0778   | UK [Scotland] | 2013 | turkey      | Y | N |
| 40513 | C0788   | UK [Scotland] | 2013 | turkey      | Y | N |
| 40514 | C0789   | UK [Scotland] | 2013 | turkey      | Y | N |
| 40515 | C0790   | UK [Scotland] | 2013 | turkey      | Y | N |
| 40516 | C0791   | UK [Scotland] | 2013 | turkey      | Y | N |
| 40517 | C0792   | UK [Scotland] | 2013 | turkey      | Y | N |
| 40518 | C0793   | UK [Scotland] | 2013 | turkey      | Y | N |
| 40519 | C0795   | UK [Scotland] | 2013 | turkey      | N | N |
| 40520 | C0798   | UK [Scotland] | 2013 | turkey      | Y | N |
| 40524 | C0804   | UK [Scotland] | 2013 | chicken     | Y | Y |
| 40525 | C0805   | UK [Scotland] | 2013 | turkey      | Y | Y |

|       |         |               |      |             |   |   |
|-------|---------|---------------|------|-------------|---|---|
| 40627 | ARI3003 | UK [Scotland] | 2013 | human stool | Y | Y |
| 40632 | ARI3009 | UK [Scotland] | 2013 | human stool | Y | N |
| 40651 | ARI3032 | UK [Scotland] | 2013 | human stool | Y | N |
| 40670 | ARI3053 | UK [Scotland] | 2013 | human stool | Y | N |
| 40671 | ARI3054 | UK [Scotland] | 2013 | human stool | Y | N |
| 40674 | ARI3057 | UK [Scotland] | 2013 | human stool | Y | N |
| 40694 | ARI3097 | UK [Scotland] | 2014 | human stool | Y | N |
| 40701 | ARI3113 | UK [Scotland] | 2014 | human stool | Y | N |
| 40721 | ARI3133 | UK [Scotland] | 2014 | human stool | Y | N |
| 40723 | ARI3135 | UK [Scotland] | 2014 | human stool | Y | N |
| 40738 | ARI3150 | UK [Scotland] | 2014 | human stool | Y | N |
| 40739 | ARI3151 | UK [Scotland] | 2014 | human stool | Y | N |
| 40753 | ARI3165 | UK [Scotland] | 2014 | human stool | Y | N |
| 40755 | ARI3167 | UK [Scotland] | 2014 | human stool | Y | N |
| 40761 | ARI3173 | UK [Scotland] | 2014 | human stool | Y | N |
| 40763 | ARI3175 | UK [Scotland] | 2014 | human stool | Y | N |
| 40781 | ARI3193 | UK [Scotland] | 2014 | human stool | Y | N |
| 40786 | ARI3198 | UK [Scotland] | 2014 | human stool | Y | Y |
| 40792 | ARI3204 | UK [Scotland] | 2014 | human stool | Y | N |
| 40794 | ARI3206 | UK [Scotland] | 2014 | human stool | Y | N |
| 40801 | ARI3213 | UK [Scotland] | 2014 | human stool | Y | N |
| 40809 | ARI3221 | UK [Scotland] | 2014 | human stool | Y | N |
| 40830 | ARI3243 | UK [Scotland] | 2014 | human stool | Y | N |
| 40841 | ARI3256 | UK [Scotland] | 2014 | human stool | Y | N |
| 40844 | ARI3259 | UK [Scotland] | 2014 | human stool | Y | N |
| 40846 | ARI3261 | UK [Scotland] | 2014 | human stool | Y | N |
| 40849 | ARI3264 | UK [Scotland] | 2014 | human stool | Y | N |
| 40855 | ARI3270 | UK [Scotland] | 2014 | human stool | Y | N |
| 40856 | ARI3271 | UK [Scotland] | 2014 | human stool | Y | N |
| 40881 | ARI3296 | UK [Scotland] | 2014 | human stool | Y | N |
| 40894 | ARI3309 | UK [Scotland] | 2014 | human stool | Y | N |
| 40898 | ARI3314 | UK [Scotland] | 2014 | human stool | Y | N |
| 40907 | ARI3323 | UK [Scotland] | 2014 | human stool | Y | N |
| 41034 | C0858   | UK [Scotland] | 2014 | chicken     | Y | N |
| 41038 | C0862   | UK [Scotland] | 2014 | chicken     | Y | N |
| 41039 | C0863   | UK [Scotland] | 2014 | chicken     | Y | N |
| 41040 | C0864   | UK [Scotland] | 2014 | chicken     | Y | N |
| 41052 | C0878   | UK [Scotland] | 2014 | chicken     | Y | N |
| 41065 | C0892   | UK [Scotland] | 2014 | chicken     | Y | N |
| 41068 | C0895   | UK [Scotland] | 2014 | chicken     | Y | N |
| 41118 | C0950   | UK [Scotland] | 2014 | chicken     | Y | N |
| 41122 | C0954   | UK [Scotland] | 2014 | chicken     | Y | N |
| 41125 | C0957   | UK [Scotland] | 2014 | chicken     | Y | N |
| 41277 | ARI3330 | UK [Scotland] | 2014 | human stool | Y | N |
| 41282 | ARI3337 | UK [Scotland] | 2014 | human stool | Y | N |
| 41325 | ARI3382 | UK [Scotland] | 2014 | human stool | Y | N |
| 41377 | ARI3435 | UK [Scotland] | 2014 | human stool | Y | Y |

|       |         |               |      |             |   |   |
|-------|---------|---------------|------|-------------|---|---|
| 41403 | ARI3471 | UK [Scotland] | 2014 | human stool | Y | N |
| 41406 | ARI3475 | UK [Scotland] | 2014 | human stool | Y | N |
| 41431 | ARI3508 | UK [Scotland] | 2014 | human stool | Y | N |
| 41442 | ARI3520 | UK [Scotland] | 2014 | human stool | Y | N |
| 41481 | ARI3563 | UK [Scotland] | 2014 | human stool | Y | N |
| 41486 | ARI3569 | UK [Scotland] | 2014 | human stool | Y | N |
| 41507 | ARI3591 | UK [Scotland] | 2014 | human stool | Y | N |
| 41511 | ARI3595 | UK [Scotland] | 2014 | human stool | Y | N |
| 41518 | ARI3602 | UK [Scotland] | 2014 | human stool | Y | N |
| 41640 | C1002   | UK [Scotland] | 2014 | chicken     | Y | N |
| 41644 | C1011   | UK [Scotland] | 2014 | chicken     | Y | N |
| 41649 | C1017   | UK [Scotland] | 2014 | chicken     | Y | N |
| 41656 | C1025   | UK [Scotland] | 2014 | chicken     | Y | N |
| 41675 | C1049   | UK [Scotland] | 2014 | chicken     | Y | N |
| 41681 | C1056   | UK [Scotland] | 2014 | chicken     | Y | N |
| 41702 | C1084   | UK [Scotland] | 2014 | chicken     | Y | N |
| 41715 | C1099   | UK [Scotland] | 2014 | chicken     | Y | N |
| 41743 | C1133   | UK [Scotland] | 2014 | turkey      | Y | N |
| 41760 | C1168   | UK [Scotland] | 2014 | chicken     | Y | N |
| 41827 | S1176   | UK [Scotland] | 2014 | sheep       | Y | N |
| 41883 | ARI3478 | UK [Scotland] | 2014 | human stool | Y | N |
| 41889 | ARI3512 | UK [Scotland] | 2014 | human stool | Y | N |
| 41908 | ARI3621 | UK [Scotland] | 2014 | human stool | Y | Y |
| 41917 | ARI3630 | UK [Scotland] | 2014 | human stool | Y | N |
| 41919 | ARI3632 | UK [Scotland] | 2014 | human stool | Y | Y |
| 41947 | ARI3660 | UK [Scotland] | 2014 | human stool | Y | N |
| 41983 | ARI3696 | UK [Scotland] | 2014 | human stool | Y | N |
| 42005 | ARI3718 | UK [Scotland] | 2014 | human stool | Y | N |
| 42014 | ARI3727 | UK [Scotland] | 2014 | human stool | Y | N |
| 42016 | ARI3729 | UK [Scotland] | 2014 | human stool | Y | N |
| 42019 | ARI3732 | UK [Scotland] | 2014 | human stool | Y | N |
| 42060 | ARI3774 | UK [Scotland] | 2015 | human stool | Y | N |
| 42065 | ARI3779 | UK [Scotland] | 2015 | human stool | Y | N |
| 42066 | ARI3780 | UK [Scotland] | 2015 | human stool | Y | N |
| 42074 | ARI3789 | UK [Scotland] | 2015 | human stool | Y | N |
| 42076 | ARI3792 | UK [Scotland] | 2015 | human stool | Y | N |
| 42080 | ARI3796 | UK [Scotland] | 2015 | human stool | Y | N |
| 42084 | ARI3800 | UK [Scotland] | 2015 | human stool | Y | N |
| 42112 | ARI3828 | UK [Scotland] | 2015 | human stool | Y | N |
| 42115 | ARI3831 | UK [Scotland] | 2015 | human stool | Y | N |
| 42119 | ARI3835 | UK [Scotland] | 2015 | human stool | Y | N |
| 42121 | ARI3837 | UK [Scotland] | 2015 | human stool | Y | N |
| 42122 | ARI3838 | UK [Scotland] | 2015 | human stool | Y | N |
| 42124 | ARI3840 | UK [Scotland] | 2015 | human stool | Y | N |
| 42127 | ARI3843 | UK [Scotland] | 2015 | human stool | Y | N |
| 42129 | ARI3845 | UK [Scotland] | 2015 | human stool | Y | N |
| 42130 | ARI3846 | UK [Scotland] | 2015 | human stool | Y | N |

|       |         |               |      |             |     |   |
|-------|---------|---------------|------|-------------|-----|---|
| 42151 | ARI3869 | UK [Scotland] | 2015 | human stool | Y   | N |
| 42152 | ARI3870 | UK [Scotland] | 2015 | human stool | Y   | N |
| 42153 | ARI3871 | UK [Scotland] | 2015 | human stool | Y   | N |
| 42177 | C0474   | UK [Scotland] | 2013 | chicken     | Y   | Y |
| 42195 | C1182   | UK [Scotland] | 2014 | turkey      | Y   | Y |
| 42208 | C1211   | UK [Scotland] | 2014 | chicken     | Y   | N |
| 42230 | C1253   | UK [Scotland] | 2014 | chicken     | Y   | N |
| 42257 | C1297   | UK [Scotland] | 2015 | chicken     | Y   | N |
| 42269 | C1322   | UK [Scotland] | 2015 | chicken     | Y   | N |
| 42277 | C1334   | UK [Scotland] | 2015 | chicken     | Y   | N |
| 42285 | C1345   | UK [Scotland] | 2015 | turkey      | Y   | Y |
| 42288 | C1349   | UK [Scotland] | 2015 | turkey      | Y   | Y |
| 42295 | C1358   | UK [Scotland] | 2015 | chicken     | Y   | N |
| 42299 | C1362   | UK [Scotland] | 2015 | chicken     | Y   | N |
| 42300 | C1363   | UK [Scotland] | 2015 | chicken     | Y   | N |
| 42314 | C1387   | UK [Scotland] | 2015 | chicken     | Y   | N |
| 42334 | C1408   | UK [Scotland] | 2015 | chicken     | Y   | Y |
| 42344 | C1420   | UK [Scotland] | 2015 | chicken     | Y   | N |
| 42346 | C1422   | UK [Scotland] | 2015 | chicken     | unk | N |
| 42350 | C1426   | UK [Scotland] | 2015 | chicken     | Y   | N |
| 42351 | C1427   | UK [Scotland] | 2015 | chicken     | Y   | N |
| 42353 | C1429   | UK [Scotland] | 2015 | chicken     | Y   | N |
| 42355 | C1431   | UK [Scotland] | 2015 | chicken     | Y   | N |
| 42363 | C1441   | UK [Scotland] | 2015 | chicken     | Y   | N |
| 42364 | C1442   | UK [Scotland] | 2015 | chicken     | Y   | N |
| 42369 | C1447   | UK [Scotland] | 2015 | chicken     | Y   | N |
| 42382 | C1461   | UK [Scotland] | 2015 | chicken     | Y   | N |
| 42394 | C1473   | UK [Scotland] | 2015 | chicken     | Y   | N |
| 42403 | C1482   | UK [Scotland] | 2015 | chicken     | Y   | Y |
| 42420 | C1499   | UK [Scotland] | 2015 | chicken     | Y   | N |
| 42427 | C1506   | UK [Scotland] | 2015 | chicken     | Y   | N |
| 42447 | C1526   | UK [Scotland] | 2015 | chicken     | Y   | Y |
| 42467 | C1546   | UK [Scotland] | 2015 | chicken     | Y   | N |
| 42469 | C1548   | UK [Scotland] | 2015 | chicken     | Y   | N |
| 42470 | C1549   | UK [Scotland] | 2015 | chicken     | N   | N |
| 42471 | C1550   | UK [Scotland] | 2015 | chicken     | N   | N |
| 42473 | C1552   | UK [Scotland] | 2015 | chicken     | N   | N |
| 42554 | ARI1419 | UK [Scotland] | 2011 | human stool | Y   | N |
| 42563 | ARI1428 | UK [Scotland] | 2012 | human stool | N   | Y |
| 42569 | ARI1435 | UK [Scotland] | 2012 | human stool | Y   | N |
| 42574 | ARI1441 | UK [Scotland] | 2012 | human stool | N   | N |
| 42586 | ARI1455 | UK [Scotland] | 2012 | human stool | Y   | N |
| 42594 | ARI1464 | UK [Scotland] | 2012 | human stool | Y   | N |
| 42657 | ARI0909 | UK [Scotland] | 2011 | human stool | Y   | N |
| 42661 | ARI0913 | UK [Scotland] | 2011 | human stool | N   | N |
| 42664 | ARI0916 | UK [Scotland] | 2011 | human stool | Y   | Y |
| 42678 | ARI0930 | UK [Scotland] | 2011 | human stool | Y   | N |

|       |         |               |      |             |   |   |
|-------|---------|---------------|------|-------------|---|---|
| 42682 | ARI0934 | UK [Scotland] | 2011 | human stool | Y | N |
| 42683 | ARI0935 | UK [Scotland] | 2011 | human stool | Y | N |
| 42691 | ARI0945 | UK [Scotland] | 2011 | human stool | Y | N |
| 42718 | ARI0976 | UK [Scotland] | 2011 | human stool | N | Y |
| 42726 | ARI0986 | UK [Scotland] | 2011 | human stool | Y | N |
| 42821 | ARI1091 | UK [Scotland] | 2011 | human stool | Y | N |
| 42823 | ARI1093 | UK [Scotland] | 2011 | human stool | Y | N |
| 42824 | ARI1094 | UK [Scotland] | 2011 | human stool | Y | N |
| 42952 | ARI1130 | UK [Scotland] | 2011 | human stool | Y | N |
| 42973 | ARI1153 | UK [Scotland] | 2011 | human stool | Y | N |
| 42984 | ARI1165 | UK [Scotland] | 2011 | human stool | Y | N |
| 42992 | ARI1173 | UK [Scotland] | 2011 | human stool | Y | N |
| 42996 | ARI1177 | UK [Scotland] | 2011 | human stool | Y | N |
| 43001 | ARI1182 | UK [Scotland] | 2011 | human stool | N | N |
| 43023 | ARI1205 | UK [Scotland] | 2011 | human stool | Y | N |
| 43027 | ARI1209 | UK [Scotland] | 2011 | human stool | Y | N |
| 43043 | ARI1227 | UK [Scotland] | 2011 | human stool | Y | N |
| 43071 | ARI1256 | UK [Scotland] | 2011 | human stool | Y | Y |
| 43079 | ARI1264 | UK [Scotland] | 2011 | human stool | Y | N |
| 43100 | ARI1287 | UK [Scotland] | 2011 | human stool | Y | N |
| 43108 | ARI1295 | UK [Scotland] | 2011 | human stool | Y | N |
| 43111 | ARI1298 | UK [Scotland] | 2011 | human stool | Y | Y |
| 43142 | ARI1330 | UK [Scotland] | 2011 | human stool | Y | N |
| 43145 | ARI1333 | UK [Scotland] | 2011 | human stool | Y | N |
| 43146 | ARI1334 | UK [Scotland] | 2011 | human stool | Y | N |
| 43152 | ARI1340 | UK [Scotland] | 2011 | human stool | Y | N |
| 43177 | ARI1365 | UK [Scotland] | 2011 | human stool | Y | N |
| 43295 | ARI0872 | UK [Scotland] | 2011 | human stool | Y | N |
| 43299 | ARI0877 | UK [Scotland] | 2011 | human stool | Y | N |
| 43306 | ARI0884 | UK [Scotland] | 2011 | human stool | Y | Y |
| 43308 | ARI0886 | UK [Scotland] | 2011 | human stool | Y | N |
| 43309 | ARI0887 | UK [Scotland] | 2011 | human stool | Y | N |
| 43339 | C0261   | UK [Scotland] | 2011 | chicken     | Y | N |
| 43340 | C0262   | UK [Scotland] | 2011 | chicken     | Y | N |
| 43363 | C0285   | UK [Scotland] | 2011 | chicken     | Y | N |
| 43365 | C0287   | UK [Scotland] | 2011 | chicken     | Y | N |
| 43366 | C0288   | UK [Scotland] | 2011 | chicken     | Y | N |
| 43369 | C0291   | UK [Scotland] | 2011 | chicken     | Y | N |
| 43396 | C0318   | UK [Scotland] | 2011 | chicken     | Y | N |
| 43434 | C0393   | UK [Scotland] | 2012 | chicken     | Y | N |
| 43435 | C0394   | UK [Scotland] | 2012 | chicken     | Y | N |
| 43444 | C0407   | UK [Scotland] | 2012 | chicken     | Y | N |
| 43445 | C0408   | UK [Scotland] | 2012 | chicken     | Y | N |
| 43478 | C0452   | UK [Scotland] | 2012 | chicken     | Y | N |
| 43517 | S0625   | UK [Scotland] | 2011 | sheep       | Y | N |
| 43587 | NWC10   | UK [England]  | 2015 | human stool | Y | N |
| 43594 | NWC3    | UK [England]  | 2015 | human stool | Y | N |



|       |          |              |      |             |   |   |
|-------|----------|--------------|------|-------------|---|---|
| 43596 | NWC2     | UK [England] | 2015 | human stool | Y | Y |
| 43603 | OXC10002 | UK [England] | 2015 | human stool | Y | N |
| 43617 | OXC10001 | UK [England] | 2015 | human stool | Y | N |
| 43644 | NWC44    | UK [England] | 2015 | human stool | Y | Y |
| 43647 | NWC58    | UK [England] | 2015 | human stool | Y | Y |
| 43650 | NWC56    | UK [England] | 2015 | human stool | Y | Y |
| 43657 | NWC36    | UK [England] | 2015 | human stool | Y | N |
| 43667 | NWC66    | UK [England] | 2015 | human stool | N | N |
| 43672 | NWC67    | UK [England] | 2015 | human stool | N | N |
| 43688 | NWC71    | UK [England] | 2015 | human stool | N | N |
| 43692 | OXC10026 | UK [England] | 2015 | human stool | Y | N |
| 43695 | OXC10016 | UK [England] | 2015 | human stool | Y | N |
| 43738 | NWC109   | UK [England] | 2015 | human stool | Y | N |
| 43784 | OXC10071 | UK [England] | 2015 | human stool | Y | N |
| 43798 | NWC723   | UK [England] | 2016 | human stool | Y | Y |
| 43802 | ACP758   | UK           | 2016 | chicken     | Y | N |
| 43807 | OXC10078 | UK [England] | 2015 | human stool | Y | N |
| 43810 | OXC10082 | UK [England] | 2015 | human stool | Y | N |
| 43834 | NWC87    | UK [England] | 2015 | human stool | Y | N |
| 43836 | OXC10039 | UK [England] | 2015 | human stool | Y | N |
| 43838 | NWC183   | UK [England] | 2016 | human stool | Y | Y |
| 43849 | OXC10093 | UK [England] | 2015 | human stool | Y | N |
| 43866 | NWC189   | UK [England] | 2016 | human stool | Y | Y |
| 43883 | NWC181   | UK [England] | 2016 | human stool | Y | N |
| 43889 | NWC173   | UK [England] | 2015 | human stool | Y | Y |
| 43890 | NWC186   | UK [England] | 2016 | human stool | Y | N |
| 47259 | FI38     | Lithuania    | 2012 | chicken     | Y | N |
| 47260 | FI01     | Estonia      | 2013 | human       | Y | N |
| 47261 | FI43     | Lithuania    | 2012 | chicken     | Y | N |
| 47262 | FI32     | Lithuania    | 2012 | chicken     | Y | N |
| 47263 | FI42     | Lithuania    | 2012 | chicken     | Y | N |
| 47264 | FI46     | Lithuania    | 2012 | chicken     | Y | N |
| 47299 | NWC211   | UK [England] | 2015 | human stool | Y | N |
| 47309 | NWC213   | UK [England] | 2016 | human stool | Y | N |
| 47311 | NWC197   | UK [England] | 2016 | human stool | Y | Y |
| 47314 | NWC199   | UK [England] | 2016 | human stool | Y | Y |
| 47318 | NWC212   | UK [England] | 2016 | human stool | Y | Y |
| 47323 | NWC207   | UK [England] | 2015 | human stool | Y | Y |
| 47333 | OXC10146 | UK [England] | 2016 | human stool | Y | N |
| 47345 | OXC10149 | UK [England] | 2016 | human stool | N | N |
| 47350 | NWC219   | UK [England] | 2016 | human stool | Y | N |
| 47362 | NWC225   | UK [England] | 2016 | human stool | Y | N |
| 47516 | APHAP50  | UK           |      | chicken     | Y | N |
| 47517 | APHAP51  | UK           |      | chicken     | Y | N |
| 47519 | APHAP53  | UK           |      | chicken     | Y | N |
| 47533 | APHAP71  | UK           |      | chicken     | Y | N |
| 47612 | APHAP140 | UK           |      | chicken     | Y | N |

|       |          |               |      |             |   |   |
|-------|----------|---------------|------|-------------|---|---|
| 47682 | ACP780   | UK            | 2016 | chicken     | N | Y |
| 47689 | NWC240   | UK [England]  | 2016 | human stool | Y | N |
| 47694 | NWC253   | UK [England]  | 2016 | human stool | Y | N |
| 47705 | NWC234   | UK [England]  | 2016 | human stool | Y | Y |
| 47735 | NWC301   | UK [England]  | 2015 | human stool | Y | N |
| 47741 | NWC286   | UK [England]  | 2015 | human stool | Y | Y |
| 47750 | NWC302   | UK [England]  | 2015 | human stool | Y | N |
| 47752 | OXC10173 | UK [England]  | 2015 | human stool | Y | N |
| 47780 | NWC297   | UK [England]  | 2015 | human stool | Y | Y |
| 47787 | OXC10168 | UK [England]  | 2015 | human stool | Y | N |
| 47837 | ACP191   | UK            | 2016 | chicken     | Y | N |
| 47851 | ACP1089  | UK            | 2016 | chicken     | Y | N |
| 47863 | NWC310   | UK [England]  | 2016 | human stool | Y | N |
| 47870 | NWC312   | UK [England]  | 2016 | human stool | Y | Y |
| 47888 | NWC320   | UK [England]  | 2016 | human stool | Y | Y |
| 47889 | NWC315   | UK [England]  | 2016 | human stool | Y | Y |
| 47897 | NWC325   | UK [England]  | 2016 | human stool | Y | Y |
| 47916 | NWC333   | UK [England]  | 2016 | human stool | Y | Y |
| 47927 | ACP657   | UK            | 2016 | chicken     | Y | N |
| 48278 | ARI4142  | UK [Scotland] | 2015 | human stool | Y | N |
| 48287 | ARI4155  | UK [Scotland] | 2015 | human stool | Y | Y |
| 48298 | ARI4166  | UK [Scotland] | 2015 | human stool | Y | Y |
| 48299 | ARI4167  | UK [Scotland] | 2015 | human stool | Y | Y |
| 48307 | ARI4175  | UK [Scotland] | 2015 | human stool | Y | Y |
| 48314 | ARI4182  | UK [Scotland] | 2015 | human stool | N | Y |
| 48322 | ARI4190  | UK [Scotland] | 2015 | human stool | Y | N |
| 48334 | ARI4202  | UK [Scotland] | 2015 | human stool | Y | N |
| 48355 | ARI3955  | UK [Scotland] | 2015 | human stool | Y | N |
| 48402 | ARI4066  | UK [Scotland] | 2015 | human stool | Y | N |
| 48438 | ARI4134  | UK [Scotland] | 2015 | human stool | Y | N |
| 48439 | ARI4135  | UK [Scotland] | 2015 | human stool | Y | N |
| 50125 | NWC348   | UK [England]  | 2016 | human stool | Y | Y |
| 50132 | NWC357   | UK [England]  | 2016 | human stool | Y | N |
| 50142 | NWC369   | UK [England]  | 2016 | human stool | Y | N |
| 50167 | NWC380   | UK [England]  | 2016 | human stool | Y | N |
| 50181 | NWC401   | UK [England]  | 2016 | human stool | Y | N |
| 50215 | NWC386   | UK [England]  | 2016 | human stool | Y | N |
| 50231 | NWC448   | UK [England]  | 2016 | human stool | N | N |
| 50237 | NWC455   | UK [England]  | 2016 | human stool | Y | N |
| 50268 | NWC510   | UK [England]  | 2016 | human stool | Y | N |
| 50274 | NWC485   | UK [England]  | 2016 | human stool | Y | Y |
| 50278 | NWC515   | UK [England]  | 2016 | human stool | Y | N |
| 50311 | NWC518   | UK [England]  | 2016 | human stool | Y | N |
| 50318 | NWC505   | UK [England]  | 2016 | human stool | Y | N |
| 50325 | NWC466   | UK [England]  | 2016 | human stool | Y | Y |
| 50327 | NWC468   | UK [England]  | 2016 | human stool | Y | N |
| 50341 | OXC10259 | UK [England]  | 2016 | human stool | Y | N |

|       |          |              |      |             |   |   |
|-------|----------|--------------|------|-------------|---|---|
| 50344 | NWC479   | UK [England] | 2016 | human stool | Y | N |
| 50347 | NWC486   | UK [England] | 2016 | human stool | Y | Y |
| 50411 | APHAC63  | UK           |      | chicken     | Y | N |
| 50479 | NWC584   | UK [England] | 2016 | human stool | Y | N |
| 50480 | NWC580   | UK [England] | 2016 | human stool | Y | N |
| 50488 | NWC544   | UK [England] | 2016 | human stool | Y | N |
| 50503 | OXC10284 | UK [England] | 2016 | human stool | N | N |
| 50527 | OXC10305 | UK [England] | 2016 | human stool | Y | N |
| 50530 | OXC10307 | UK [England] | 2016 | human stool | Y | N |
| 50549 | NWC563   | UK [England] | 2016 | human stool | N | N |
| 50550 | NWC564   | UK [England] | 2016 | human stool | Y | N |
| 50563 | OXC10314 | UK [England] | 2016 | human stool | Y | Y |
| 50570 | NWC621   | UK [England] | 2016 | human stool | Y | N |
| 50575 | NWC607   | UK [England] | 2016 | human stool | Y | N |
| 50608 | OXC10318 | UK [England] | 2016 | human stool | Y | N |
| 50616 | NWC651   | UK [England] | 2016 | human stool | Y | N |
| 50637 | OXC10325 | UK [England] | 2016 | human stool | Y | Y |
| 50642 | ACP1202  | UK           | 2016 | chicken     | Y | Y |
| 50688 | NWC658   | UK [England] | 2016 | human stool | Y | N |
| 50694 | ACP74    | UK           | 2016 | chicken     | Y | Y |
| 50714 | ACP719   | UK           | 2016 | chicken     | Y | N |
| 50735 | ACP146   | UK           | 2016 | chicken     | Y | N |
| 50746 | NWC666   | UK [England] | 2016 | human stool | Y | N |
| 50749 | OXC10328 | UK [England] | 2016 | human stool | Y | Y |
| 50750 | OXC10329 | UK [England] | 2016 | human stool | Y | N |
| 50763 | ACP709   | UK           | 2016 | chicken     | Y | N |
| 50768 | ACP718   | UK           | 2016 | chicken     | Y | N |
| 50777 | ACP740   | UK           | 2016 | chicken     | Y | N |
| 50873 | ACP706   | UK           | 2016 | chicken     | Y | N |
| 50886 | ACP466   | UK           | 2016 | chicken     | Y | Y |
| 50895 | ACP492   | UK           | 2016 | chicken     | Y | N |
| 50898 | ACP50    | UK           | 2016 | chicken     | Y | Y |
| 50901 | ACP59    | UK           | 2016 | chicken     | Y | Y |
| 50989 | NWC679   | UK [England] | 2016 | human stool | Y | N |
| 51020 | ACP1068  | UK           | 2016 | chicken     | Y | N |
| 51023 | ACP1083  | UK           | 2016 | chicken     | Y | N |
| 51073 | ACP296   | UK           | 2016 | chicken     | Y | N |
| 51097 | ACP328   | UK           | 2016 | chicken     | Y | N |
| 51117 | ACP1124  | UK           | 2016 | chicken     | Y | N |
| 51123 | ACP1132  | UK           | 2016 | chicken     | Y | N |
| 51127 | ACP1140  | UK           | 2016 | chicken     | Y | N |
| 51145 | ACP669   | UK           | 2016 | chicken     | Y | N |
| 51147 | ACP619   | UK           | 2016 | chicken     | Y | N |
| 51186 | ACP250   | UK           | 2016 | chicken     | Y | N |
| 51210 | ACP278   | UK           | 2016 | chicken     | Y | N |
| 51221 | ACP752   | UK           | 2016 | chicken     | Y | Y |
| 51241 | ACP618   | UK           | 2016 | chicken     | Y | N |

|       |          |               |      |             |   |   |
|-------|----------|---------------|------|-------------|---|---|
| 51242 | ACP673   | UK            | 2016 | chicken     | Y | N |
| 51264 | ACP1023  | UK            | 2016 | chicken     | N | Y |
| 51267 | ACP1029  | UK            | 2016 | chicken     | Y | Y |
| 51273 | ACP620   | UK            | 2016 | chicken     | Y | N |
| 51334 | ACP1199  | UK            | 2016 | chicken     | Y | N |
| 51364 | ACP934   | UK            | 2016 | chicken     | Y | Y |
| 51365 | ACP935   | UK            | 2016 | chicken     | Y | Y |
| 51383 | OXC10355 | UK [England]  | 2016 | human stool | Y | N |
| 51384 | OXC10356 | UK [England]  | 2016 | human stool | Y | Y |
| 51386 | OXC10358 | UK [England]  | 2016 | human stool | Y | Y |
| 51389 | NWC683   | UK [England]  | 2016 | human stool | Y | N |
| 51390 | NWC684   | UK [England]  | 2016 | human stool | N | N |
| 51403 | NWC693   | UK [England]  | 2016 | human stool | Y | N |
| 51404 | NWC694   | UK [England]  | 2016 | human stool | Y | N |
| 51424 | ACP886   | UK            | 2016 | chicken     | Y | N |
| 51432 | NWC699   | UK [England]  | 2016 | human stool | Y | N |
| 51444 | NWC711   | UK [England]  | 2016 | human stool | Y | N |
| 51456 | ACP1091  | UK            | 2016 | chicken     | Y | Y |
| 51460 | ACP1287  | UK            | 2016 | chicken     | Y | Y |
| 51465 | ACP256   | UK            | 2016 | chicken     | Y | N |
| 51481 | ACP292   | UK            | 2016 | chicken     | Y | N |
| 51486 | ACP1118  | UK            | 2016 | chicken     | Y | N |
| 51487 | ACP757   | UK            | 2016 | chicken     | Y | N |
| 51490 | ACP1284  | UK            | 2016 | chicken     | Y | N |
| 51510 | ACP1282  | UK            | 2016 | chicken     | Y | N |
| 51514 | ACP434   | UK            | 2016 | chicken     | Y | N |
| 51518 | ACP665   | UK            | 2016 | chicken     | Y | N |
| 51531 | ACP793   | UK            | 2016 | chicken     | Y | N |
| 51553 | 11_S10   | Spain         | 2010 | chicken     | Y | N |
| 51604 | 64_S62   | Spain         | 2010 | waters      | Y | N |
| 51656 | RC291    | UK            | 2011 | chicken     | Y | N |
| 51697 | ACP818   | UK            | 2016 | chicken     | Y | Y |
| 51709 | OXC10378 | UK [England]  | 2016 | human stool | Y | N |
| 51718 | OXC10385 | UK [England]  | 2016 | human stool | Y | N |
| 51720 | NWC728   | UK [England]  | 2016 | human stool | Y | N |
| 51744 | ACP897   | UK            | 2016 | chicken     | Y | N |
| 51833 | C1580    | UK [Scotland] | 2015 | chicken     | Y | Y |
| 51852 | ACP45    | UK            | 2016 | chicken     | Y | N |
| 51853 | ACP46    | UK            | 2016 | chicken     | Y | N |
| 51854 | ACP47    | UK            | 2016 | chicken     | Y | Y |
| 51856 | ACP66    | UK            | 2016 | chicken     | Y | N |
| 51866 | C1581    | UK [Scotland] | 2016 | chicken     | Y | Y |
| 51867 | C1582    | UK [Scotland] | 2016 | chicken     | Y | Y |
| 51873 | NWC743   | UK [England]  | 2016 | human stool | Y | N |
| 51875 | ACP1177  | UK            | 2016 | chicken     | Y | N |
| 56222 | ARI4245  | UK [Scotland] | 2015 | human stool | Y | Y |
| 56233 | ARI4256  | UK [Scotland] | 2015 | human stool | Y | Y |

|       |          |               |      |             |   |   |
|-------|----------|---------------|------|-------------|---|---|
| 56239 | ARI4262  | UK [Scotland] | 2015 | human stool | Y | Y |
| 56242 | ARI4265  | UK [Scotland] | 2015 | human stool | Y | Y |
| 56243 | ARI4266  | UK [Scotland] | 2015 | human stool | Y | Y |
| 56248 | ARI4271  | UK [Scotland] | 2015 | human stool | Y | Y |
| 56251 | ARI4274  | UK [Scotland] | 2015 | human stool | Y | Y |
| 56265 | ARI4290  | UK [Scotland] | 2016 | human stool | Y | N |
| 56280 | ARI4306  | UK [Scotland] | 2016 | human stool | Y | Y |
| 56283 | ARI4309  | UK [Scotland] | 2016 | human stool | Y | Y |
| 56284 | ARI4310  | UK [Scotland] | 2016 | human stool | Y | Y |
| 56285 | ARI4311  | UK [Scotland] | 2016 | human stool | Y | Y |
| 56293 | ARI4316  | UK [Scotland] | 2016 | human stool | Y | N |
| 56318 | ARI4342  | UK [Scotland] | 2016 | human stool | Y | Y |
| 56335 | ARI4360  | UK [Scotland] | 2016 | human stool | Y | Y |
| 56338 | ARI4364  | UK [Scotland] | 2016 | human stool | Y | Y |
| 56364 | ARI4391  | UK [Scotland] | 2016 | human stool | Y | Y |
| 56370 | ARI4397  | UK [Scotland] | 2016 | human stool | Y | Y |
| 56372 | ARI4400  | UK [Scotland] | 2016 | human stool | N | Y |
| 56380 | ARI4408  | UK [Scotland] | 2016 | human stool | Y | N |
| 56385 | ARI4341  | UK [Scotland] | 2016 | human stool | Y | N |
| 56394 | ARI4420  | UK [Scotland] | 2016 | human stool | Y | N |
| 56397 | ARI4423  | UK [Scotland] | 2016 | human stool | N | N |
| 56408 | ARI4435  | UK [Scotland] | 2016 | human stool | N | N |
| 56426 | ARI4454  | UK [Scotland] | 2016 | human stool | N | N |
| 56445 | ARI4473  | UK [Scotland] | 2016 | human stool | N | N |
| 56462 | C1556    | UK [Scotland] | 2015 | chicken     | N | Y |
| 56463 | C1557    | UK [Scotland] | 2015 | chicken     | N | Y |
| 56467 | C1561    | UK [Scotland] | 2015 | chicken     | N | Y |
| 56469 | C1565    | UK [Scotland] | 2015 | chicken     | N | Y |
| 56470 | C1566    | UK [Scotland] | 2015 | chicken     | N | Y |
| 56471 | C1567    | UK [Scotland] | 2015 | chicken     | N | Y |
| 56472 | C1568    | UK [Scotland] | 2015 | chicken     | N | Y |
| 56474 | C1572    | UK [Scotland] | 2015 | chicken     | N | Y |
| 56478 | C1576    | UK [Scotland] | 2015 | chicken     | N | Y |
| 56479 | C1577    | UK [Scotland] | 2015 | chicken     | N | Y |
| 56481 | ARI4441  | UK [Scotland] | 2016 | human stool | N | N |
| 56520 | NWC756   | UK [England]  | 2016 | human stool | N | N |
| 56548 | OXC10394 | UK [England]  | 2016 | human stool | N | N |
| 56578 | NWC784   | UK [England]  | 2016 | human stool | N | Y |
| 56580 | NWC786   | UK [England]  | 2016 | human stool | N | N |
| 56602 | C1583    | UK [Scotland] | 2016 | chicken     | N | Y |
| 56604 | C1585    | UK [Scotland] | 2016 | chicken     | N | Y |
| 56606 | C1587    | UK [Scotland] | 2016 | chicken     | N | Y |
| 56607 | C1605    | UK [Scotland] | 2016 | chicken     | N | Y |
| 56609 | C1613    | UK [Scotland] | 2016 | chicken     | N | Y |
| 56611 | C1621    | UK [Scotland] | 2016 | chicken     | N | Y |
| 56612 | C1590    | UK [Scotland] | 2016 | chicken     | N | Y |
| 56614 | C1591    | UK [Scotland] | 2016 | chicken     | N | Y |

|       |       |               |      |         |   |   |
|-------|-------|---------------|------|---------|---|---|
| 56616 | C1592 | UK [Scotland] | 2016 | chicken | N | Y |
| 56618 | C1593 | UK [Scotland] | 2016 | chicken | N | Y |
| 56619 | C1637 | UK [Scotland] | 2016 | chicken | N | Y |
| 56620 | C1594 | UK [Scotland] | 2016 | chicken | N | Y |
| 56621 | C1641 | UK [Scotland] | 2016 | chicken | N | Y |
| 56624 | C1596 | UK [Scotland] | 2016 | chicken | N | Y |
| 56625 | C1646 | UK [Scotland] | 2016 | chicken | N | Y |
| 56626 | C1597 | UK [Scotland] | 2016 | chicken | N | Y |
| 56628 | C1598 | UK [Scotland] | 2016 | chicken | N | Y |
| 56630 | C1599 | UK [Scotland] | 2016 | chicken | N | Y |
| 56632 | C1600 | UK [Scotland] | 2016 | chicken | N | Y |
| 56639 | C1672 | UK [Scotland] | 2016 | chicken | N | Y |
| 56641 | C1673 | UK [Scotland] | 2016 | chicken | N | Y |
| 56642 | C1606 | UK [Scotland] | 2016 | chicken | N | Y |
| 56646 | C1610 | UK [Scotland] | 2016 | chicken | N | Y |
| 56647 | C1611 | UK [Scotland] | 2016 | chicken | N | Y |
| 56648 | C1612 | UK [Scotland] | 2016 | chicken | N | Y |
| 56649 | C1614 | UK [Scotland] | 2016 | chicken | N | Y |
| 56658 | C1624 | UK [Scotland] | 2016 | chicken | N | Y |
| 56662 | C1630 | UK [Scotland] | 2016 | chicken | N | Y |
| 56663 | C1631 | UK [Scotland] | 2016 | chicken | N | Y |
| 56664 | C1632 | UK [Scotland] | 2016 | chicken | N | Y |
| 56665 | C1634 | UK [Scotland] | 2016 | chicken | N | Y |
| 56668 | C1639 | UK [Scotland] | 2016 | chicken | N | Y |
| 56669 | C1640 | UK [Scotland] | 2016 | chicken | N | Y |
| 56670 | C1642 | UK [Scotland] | 2016 | chicken | N | Y |
| 56671 | C1643 | UK [Scotland] | 2016 | chicken | N | N |
| 56673 | C1647 | UK [Scotland] | 2016 | chicken | N | Y |
| 56676 | C1651 | UK [Scotland] | 2016 | chicken | N | Y |
| 56677 | C1652 | UK [Scotland] | 2016 | chicken | N | Y |
| 56687 | C1666 | UK [Scotland] | 2016 | chicken | N | Y |
| 56691 | C1671 | UK [Scotland] | 2016 | chicken | N | Y |
| 56692 | C1674 | UK [Scotland] | 2016 | chicken | N | Y |
| 56693 | C1638 | UK [Scotland] | 2016 | chicken | N | Y |
| 56698 | C1680 | UK [Scotland] | 2016 | chicken | N | Y |
| 56699 | C1682 | UK [Scotland] | 2016 | chicken | N | Y |
| 56701 | C1685 | UK [Scotland] | 2016 | chicken | N | Y |
| 56702 | C1686 | UK [Scotland] | 2016 | chicken | N | Y |
| 56703 | C1690 | UK [Scotland] | 2016 | chicken | N | Y |
| 56713 | C1700 | UK [Scotland] | 2016 | chicken | N | Y |
| 56715 | C1678 | UK [Scotland] | 2016 | chicken | N | Y |
| 56716 | C1703 | UK [Scotland] | 2016 | chicken | N | Y |
| 56717 | C1681 | UK [Scotland] | 2016 | chicken | N | Y |
| 56719 | C1683 | UK [Scotland] | 2016 | chicken | N | Y |
| 56721 | C1687 | UK [Scotland] | 2016 | chicken | N | Y |
| 56722 | C1706 | UK [Scotland] | 2016 | chicken | N | Y |
| 56723 | C1688 | UK [Scotland] | 2016 | chicken | N | Y |

|       |           |               |      |                 |   |   |
|-------|-----------|---------------|------|-----------------|---|---|
| 56725 | C1702     | UK [Scotland] | 2016 | chicken         | N | Y |
| 56727 | C1709     | UK [Scotland] | 2016 | chicken         | N | Y |
| 56728 | C1731     | UK [Scotland] | 2016 | chicken         | N | Y |
| 56730 | C1732     | UK [Scotland] | 2016 | chicken         | N | Y |
| 56731 | C1711     | UK [Scotland] | 2016 | chicken         | N | Y |
| 56732 | C1736     | UK [Scotland] | 2016 | chicken         | N | Y |
| 56733 | C1712     | UK [Scotland] | 2016 | chicken         | N | Y |
| 56734 | C1737     | UK [Scotland] | 2016 | chicken         | N | Y |
| 56738 | C1774     | UK [Scotland] | 2016 | chicken         | N | Y |
| 56744 | C1720     | UK [Scotland] | 2016 | chicken         | N | Y |
| 56747 | C1723     | UK [Scotland] | 2016 | chicken         | N | Y |
| 56758 | C1739     | UK [Scotland] | 2016 | chicken         | N | Y |
| 56781 | C1769     | UK [Scotland] | 2016 | chicken         | N | Y |
| 56785 | C1773     | UK [Scotland] | 2016 | chicken         | N | Y |
| 56802 | ARI4502   | UK [Scotland] | 2016 | human stool     | N | Y |
| 56873 | C1822     | UK [Scotland] | 2016 | chicken         | N | Y |
| 56874 | C1823     | UK [Scotland] | 2016 | chicken         | N | Y |
| 56875 | C1824     | UK [Scotland] | 2016 | chicken         | N | Y |
| 56886 | C1835     | UK [Scotland] | 2016 | chicken         | N | Y |
| 56956 | C1906     | UK [Scotland] | 2016 | chicken         | N | Y |
| 56966 | C1916     | UK [Scotland] | 2016 | chicken         | N | Y |
| 56968 | C1918     | UK [Scotland] | 2016 | chicken         | N | Y |
| 56988 | NWC804    | UK [England]  | 2016 | human stool     | N | Y |
| 57019 | NWC826    | UK [England]  | 2016 | human stool     | N | N |
| 57025 | NWC832    | UK [England]  | 2016 | human stool     | N | N |
| 57028 | NWC795    | UK [England]  | 2016 | human stool     | N | N |
| 57043 | APHAC125  | UK            |      | chicken         | N | N |
| 57065 | APHAC147  | UK            |      | chicken         | N | N |
| 57102 | APHAC186  | UK            |      | chicken         | N | N |
| 57221 | NWC856    | UK [England]  | 2016 | human stool     | N | N |
| 57241 | OXC10438  | UK [England]  | 2016 | human stool     | N | N |
| 57296 | NWC901    | UK [England]  | 2016 | human stool     | N | N |
| 57349 | OXC10479  | UK [England]  | 2016 | human stool     | N | N |
| 57367 | NWC953    | UK [England]  | 2016 | human stool     | N | N |
| 57404 | OXC10502  | UK [England]  | 2016 | human stool     | N | Y |
| 57652 | OXC10513  | UK [England]  | 2015 | human stool     | N | N |
| 57769 | chick1086 | UK            | 2009 | chicken         | N | Y |
| 57770 | chick1360 | UK            | 2009 | chicken         | N | Y |
| 57783 | chick50   | UK            | 2009 | chicken         | N | Y |
| 57867 | SS_108    | UK            | 2008 | broiler environ | N | N |
| 57868 | SS_109    | UK            | 2008 | broiler environ | N | Y |
| 57882 | SS_139    | UK            | 2008 | chicken         | N | Y |
| 57893 | SS_156    | UK            | 2008 | broiler environ | N | N |
| 57910 | SS_181    | UK            | 2008 | broiler environ | N | Y |
| 57914 | SS_187    | UK            | 2009 | chicken         | N | Y |
| 57918 | SS_191    | UK            | 2008 | broiler environ | N | N |
| 57938 | SS_222    | UK            | 2008 | broiler environ | N | N |

|       |          |               |      |             |   |   |
|-------|----------|---------------|------|-------------|---|---|
| 57971 | SS_278   | UK            | 2005 | chicken     | N | N |
| 57982 | SS_297   | UK            | 2007 | chicken     | N | Y |
| 58044 | SS_592   | UK            | 2012 | human stool | N | N |
| 58065 | NWC1026  | UK [England]  | 2016 | human stool | N | N |
| 58077 | NWC1015  | UK [England]  | 2016 | human stool | N | Y |
| 58083 | OXC10538 | UK [England]  | 2016 | human stool | N | Y |
| 58093 | NWC1011  | UK [England]  | 2017 | human stool | N | N |
| 58096 | NWC1036  | UK [England]  | 2016 | human stool | N | N |
| 58168 | ARI4000  | UK [Scotland] | 2015 | human stool | N | N |
| 58183 | ARI4022  | UK [Scotland] | 2015 | human stool | N | N |
| 58246 | NWC1063  | UK [England]  | 2016 | human stool | N | N |
| 58252 | OXC10560 | UK [England]  | 2016 | human stool | N | N |
| 58253 | NWC1068  | UK [England]  | 2016 | human stool | N | Y |
| 58264 | NWC1075  | UK [England]  | 2016 | human stool | N | Y |
| 58274 | NWC1082  | UK [England]  | 2016 | human stool | N | N |
| 58289 | NWC1087  | UK [England]  | 2016 | human stool | N | N |
| 58348 | NWC1115  | UK [England]  | 2016 | human stool | N | Y |
| 58349 | NWC1116  | UK [England]  | 2016 | human stool | N | Y |
| 58352 | OXC10590 | UK [England]  | 2016 | human stool | N | N |
| 58355 | NWC1125  | UK [England]  | 2016 | human stool | N | N |
| 58390 | NWC1165  | UK [England]  | 2016 | human stool | N | Y |
| 58437 | OXC10624 | UK [England]  | 2016 | human stool | N | N |
| 58441 | NWC1171  | UK [England]  | 2016 | human stool | N | N |
| 58515 | ARI4533  | UK [Scotland] | 2016 | human stool | N | N |
| 58528 | ARI4547  | UK [Scotland] | 2016 | human stool | N | N |
| 58532 | ARI4551  | UK [Scotland] | 2016 | human stool | N | Y |
| 59004 | NWC1193  | UK [England]  | 2017 | human stool | N | N |
| 59011 | NWC1198  | UK [England]  | 2017 | human stool | N | N |
| 59015 | OXC10648 | UK [England]  | 2017 | human stool | N | N |
| 59029 | OXC10651 | UK [England]  | 2017 | human stool | N | Y |
| 59066 | ARI4656  | UK [Scotland] | 2016 | human stool | N | N |
| 59085 | ARI4675  | UK [Scotland] | 2016 | human stool | N | N |
| 59096 | ARI4686  | UK [Scotland] | 2016 | human stool | N | N |
| 59151 | ARI4087  | UK [Scotland] | 2015 | human stool | N | N |
| 59166 | ARI4108  | UK [Scotland] | 2015 | human stool | N | N |
| 59216 | ARI4283  | UK [Scotland] | 2016 | human stool | N | Y |
| 59218 | ARI4292  | UK [Scotland] | 2016 | human stool | N | Y |
| 59243 | C1558    | UK [Scotland] | 2015 | chicken     | N | Y |
| 59303 | ARI4650  | UK [Scotland] | 2016 | human stool | N | N |
| 59321 | ARI3910  | UK [Scotland] | 2015 | human stool | N | N |
| 59343 | ARI4592  | UK [Scotland] | 2016 | human stool | N | Y |
| 59414 | NWC1235  | UK [England]  | 2016 | human stool | N | Y |
| 59423 | OXC10684 | UK [England]  | 2016 | human stool | N | N |
| 59478 | OXC10754 | UK [England]  | 2017 | human stool | N | N |
| 59496 | NWC1367  | UK [England]  | 2017 | human stool | N | N |
| 59500 | NWC1339  | UK [England]  | 2017 | human stool | N | N |
| 59507 | OXC10744 | UK [England]  | 2017 | human stool | N | N |



|       |           |              |      |             |   |   |
|-------|-----------|--------------|------|-------------|---|---|
| 59515 | NWC1348   | UK [England] | 2017 | human stool | N | N |
| 59551 | NWC1283   | UK [England] | 2017 | human stool | N | N |
| 59552 | NWC1284   | UK [England] | 2017 | human stool | N | N |
| 59557 | OXC10725  | UK [England] | 2017 | human stool | N | N |
| 59564 | OXC10726  | UK [England] | 2017 | human stool | N | N |
| 59567 | NWC1294   | UK [England] | 2017 | human stool | N | N |
| 59568 | NWC1295   | UK [England] | 2017 | human stool | N | Y |
| 59577 | NWC1305   | UK [England] | 2017 | human stool | N | N |
| 59594 | NWC1300   | UK [England] | 2017 | human stool | N | Y |
| 59595 | NWC1301   | UK [England] | 2017 | human stool | N | Y |
| 59602 | OXC10703  | UK [England] | 2016 | human stool | N | N |
| 59603 | OXC10715  | UK [England] | 2017 | human stool | N | N |
| 59607 | NWC1271   | UK [England] | 2017 | human stool | N | Y |
| 59611 | NWC1274   | UK [England] | 2017 | human stool | N | N |
| 59616 | NWC1279   | UK [England] | 2017 | human stool | N | N |
| 59636 | OXC10706  | UK [England] | 2016 | human stool | N | N |
| 59640 | OXC10695  | UK [England] | 2016 | human stool | N | N |
| 59644 | NWC1259   | UK [England] | 2016 | human stool | N | N |
| 59662 | NWC1383   | UK [England] | 2017 | human stool | N | N |
| 59672 | OXC10774  | UK [England] | 2017 | human stool | N | N |
| 59673 | OXC10775  | UK [England] | 2017 | human stool | N | N |
| 59694 | NWC1397   | UK [England] | 2017 | human stool | N | N |
| 59731 | NWC1430   | UK [England] | 2017 | human stool | N | N |
| 59742 | NWC1411   | UK [England] | 2017 | human stool | N | N |
| 59744 | OXC10792  | UK [England] | 2017 | human stool | N | N |
| 59753 | NWC1417   | UK [England] | 2017 | human stool | N | Y |
| 59761 | NWC1422   | UK [England] | 2017 | human stool | N | N |
| 59766 | NWC1424   | UK [England] | 2017 | human stool | N | N |
| 59783 | OXC10819  | UK [England] | 2017 | human stool | N | N |
| 59784 | OXC10827  | UK [England] | 2017 | human stool | N | N |
| 59786 | OXC10820  | UK [England] | 2017 | human stool | N | Y |
| 59793 | NWC1435   | UK [England] | 2017 | human stool | N | N |
| 59808 | NWC1439   | UK [England] | 2017 | human stool | N | N |
| 60436 | 508_3754  | UK           | 2009 | chicken     | N | N |
| 60437 | 507-0761  | UK           | 2009 | chicken     | N | Y |
| 60441 | 508-2543  | UK           | 2009 | chicken     | N | Y |
| 60442 | 508-2574  | UK           | 2009 | chicken     | N | Y |
| 60637 | chick19   | UK           | 2009 | chicken     | N | N |
| 60902 | CJ003CC21 | Finland      | 1998 | human blood | N | N |
| 60903 | CJ035CC21 | Finland      | 2003 | human blood | N | N |
| 60904 | CJ098CC21 | Finland      | 2001 | human blood | N | N |
| 60906 | CJ069CC21 | Finland      | 2000 | human blood | N | Y |
| 60907 | CJ502CC21 | Finland      | 2006 | human stool | N | N |
| 60908 | CJ505CC21 | Finland      | 2006 | human stool | N | Y |
| 60909 | CJ006CC21 | Finland      | 2001 | human blood | N | N |
| 60912 | CJ076CC21 | Finland      | 2005 | human blood | N | Y |
| 60913 | CJ500CC21 | Finland      | 2006 | human stool | N | Y |

|       |           |              |      |             |   |   |
|-------|-----------|--------------|------|-------------|---|---|
| 60914 | CJ501CC21 | Finland      | 2006 | human stool | N | Y |
| 60915 | CJ503CC21 | Finland      | 2006 | human stool | N | N |
| 60916 | CJ504CC21 | Finland      | 2006 | human stool | N | Y |
| 60917 | CJ506CC21 | Finland      | 2006 | human stool | N | N |
| 61091 | OXC10882  | UK [England] | 2017 | human stool | N | N |
| 61096 | NWC1467   | UK [England] | 2017 | human stool | N | N |
| 61098 | NWC1468   | UK [England] | 2017 | human stool | N | N |
| 61102 | OXC10883  | UK [England] | 2017 | human stool | N | Y |
| 61118 | OXC10884  | UK [England] | 2017 | human stool | N | N |
| 61142 | OXC10858  | UK [England] | 2017 | human stool | N | N |
| 61175 | OXC10875  | UK [England] | 2017 | human stool | N | N |
| 61180 | OXC10850  | UK [England] | 2017 | human stool | N | N |
| 61181 | OXC10851  | UK [England] | 2017 | human stool | N | N |
| 61183 | OXC10852  | UK [England] | 2017 | human stool | N | N |
| 61185 | NWC1512   | UK [England] | 2017 | human stool | N | N |
| 61193 | NWC1498   | UK [England] | 2017 | human stool | N | N |
| 61229 | OXC10907  | UK [England] | 2017 | human stool | N | N |
| 61262 | NWC1518   | UK [England] | 2017 | human stool | N | N |
| 61293 | NWC1551   | UK [England] | 2017 | human stool | N | N |
| 61304 | NWC1534   | UK [England] | 2017 | human stool | N | N |
| 61305 | NWC1541   | UK [England] | 2017 | human stool | N | N |
| 61314 | NWC1544   | UK [England] | 2017 | human stool | N | N |
| 61329 | NWC1576   | UK [England] | 2017 | human stool | N | N |
| 61336 | NWC1577   | UK [England] | 2017 | human stool | N | N |
| 61409 | FDI14     | UK           | 2015 | chicken     | N | N |
| 61413 | FDI18     | UK           | 2015 | chicken     | N | Y |
| 61438 | FDI41     | UK           | 2016 | chicken     | N | Y |
| 61449 | FDI51     | UK           | 2016 | chicken     | N | N |
| 61499 | FDI79     | UK           | 2015 | chicken     | N | N |
| 61505 | FDI128    | UK           | 2016 | chicken     | N | Y |
| 61514 | FDI137    | UK           | 2016 | chicken     | N | Y |
| 61533 | FDI124    | UK           | 2015 | chicken     | N | N |
| 61561 | FDI179    | UK           | 2015 | chicken     | N | N |
| 61575 | FDI193    | UK           | 2015 | chicken     | N | N |
| 61577 | FDI195    | UK           | 2015 | chicken     | N | Y |
| 61582 | FDI155    | UK           | 2016 | chicken     | N | Y |
| 61583 | FDI156    | UK           | 2016 | chicken     | N | Y |
| 61597 | FDI198    | UK           | 2015 | chicken     | N | N |
| 61599 | FDI200    | UK           | 2015 | chicken     | N | N |
| 61601 | FDI169    | UK           | 2015 | chicken     | N | Y |
| 61602 | FDI170    | UK           | 2015 | chicken     | N | Y |
| 61626 | FDI238    | UK           | 2016 | chicken     | N | Y |
| 61635 | FDI248    | UK           | 2015 | chicken     | N | N |
| 61646 | FDI205    | UK           | 2015 | chicken     | N | N |
| 61648 | FDI207    | UK           | 2015 | chicken     | N | N |
| 61660 | FDI295    | UK           | 2017 | lamb        | N | N |
| 61682 | FDI264    | UK           | 2016 | chicken     | N | N |

|       |          |               |      |              |   |   |
|-------|----------|---------------|------|--------------|---|---|
| 61733 | FDI343   | UK            | 2015 | chicken      | N | N |
| 62368 | AC0745   | France        |      | chicken      | N | Y |
| 62378 | AC3201   | France        |      | chicken      | N | N |
| 62442 | CTA093   | France        |      | other animal | N | N |
| 62471 | CTA693   | France        |      | other animal | N | N |
| 62607 | NWC1635  | UK [England]  | 2017 | human stool  | N | N |
| 62608 | OXC11005 | UK [England]  | 2017 | human stool  | N | N |
| 62609 | NWC1641  | UK [England]  | 2017 | human stool  | N | N |
| 62622 | NWC1645  | UK [England]  | 2017 | human stool  | N | Y |
| 62645 | NWC1666  | UK [England]  | 2017 | human stool  | N | N |
| 62673 | NWC1710  | UK [England]  | 2017 | human stool  | N | Y |
| 62743 | NWC1774  | UK [England]  | 2017 | human stool  | N | N |
| 62751 | NWC1786  | UK [England]  | 2017 | human stool  | N | N |
| 62756 | OXC11093 | UK [England]  | 2017 | human stool  | N | N |
| 62758 | NWC1782  | UK [England]  | 2017 | human stool  | N | N |
| 62767 | NWC1816  | UK [England]  | 2017 | human stool  | N | Y |
| 62770 | NWC1799  | UK [England]  | 2017 | human stool  | N | N |
| 62775 | OXC11117 | UK [England]  | 2017 | human stool  | N | N |
| 62776 | NWC1801  | UK [England]  | 2017 | human stool  | N | N |
| 62779 | NWC1802  | UK [England]  | 2017 | human stool  | N | N |
| 62781 | NWC1791  | UK [England]  | 2017 | human stool  | N | N |
| 62789 | NWC1787  | UK [England]  | 2017 | human stool  | N | N |
| 62790 | OXC11107 | UK [England]  | 2017 | human stool  | N | N |
| 62793 | OXC11106 | UK [England]  | 2017 | human stool  | N | Y |
| 62794 | OXC11103 | UK [England]  | 2017 | human stool  | N | N |
| 62797 | NWC1796  | UK [England]  | 2017 | human stool  | N | Y |
| 62798 | NWC1811  | UK [England]  | 2017 | human stool  | N | N |
| 62799 | NWC1793  | UK [England]  | 2017 | human stool  | N | N |
| 62810 | OXC11123 | UK [England]  | 2017 | human stool  | N | N |
| 62815 | OXC11126 | UK [England]  | 2017 | human stool  | N | N |
| 62819 | OXC11122 | UK [England]  | 2017 | human stool  | N | N |
| 62828 | OXC11121 | UK [England]  | 2017 | human stool  | N | Y |
| 62897 | OXC11176 | UK [England]  | 2017 | human stool  | N | N |
| 62925 | NWC1879  | UK [England]  | 2017 | human stool  | N | N |
| 63411 | F50      | UK [Scotland] | 2001 | chicken      | N | N |
| 63507 | F1202    | UK [Scotland] | 2001 | human stool  | N | N |
| 63525 | F1244    | UK [Scotland] | 2001 | human stool  | N | N |
| 63528 | F1258    | UK [Scotland] | 2001 | human stool  | N | Y |
| 63603 | F1131    | UK [Scotland] | 2001 | human stool  | N | N |
| 63606 | F1135    | UK [Scotland] | 2001 | human stool  | N | N |
| 63658 | 3316     | UK [Scotland] | 2006 | human stool  | N | Y |
| 63671 | 1929     | UK [Scotland] | 2005 | human stool  | N | N |
| 63779 | 985      | UK [Scotland] | 2005 | human stool  | N | N |
| 63780 | 986      | UK [Scotland] | 2005 | human stool  | N | N |
| 63900 | 3928     | UK [Scotland] | 2006 | human stool  | N | N |
| 63906 | 3984     | UK [Scotland] | 2006 | human stool  | N | N |
| 63917 | 4458     | UK [Scotland] | 2006 | human stool  | N | N |

|       |          |               |      |             |   |   |
|-------|----------|---------------|------|-------------|---|---|
| 63922 | 4607     | UK [Scotland] | 2006 | human stool | N | N |
| 63936 | 4907     | UK [Scotland] | 2006 | human stool | N | N |
| 63941 | 5034     | UK [Scotland] | 2006 | human stool | N | N |
| 63943 | 5117     | UK [Scotland] | 2006 | human stool | N | Y |
| 63944 | 5119     | UK [Scotland] | 2006 | human stool | N | Y |
| 63960 | ARI0674  | UK [Scotland] | 2011 | human stool | N | N |
| 64027 | ARI0787  | UK [Scotland] | 2011 | human stool | N | N |
| 64029 | ARI0744  | UK [Scotland] | 2011 | human stool | N | N |
| 64040 | OXC11391 | UK [England]  | 2018 | human stool | N | N |
| 69226 | NWC2055  | UK [England]  | 2017 | human stool | N | N |
| 69239 | NWC2065  | UK [England]  | 2017 | human stool | N | N |
| 69297 | OXC11315 | UK [England]  | 2017 | human stool | N | Y |
| 69323 | OXC11287 | UK [England]  | 2017 | human stool | N | N |
| 69324 | OXC11278 | UK [England]  | 2017 | human stool | N | N |
| 69326 | NWC2011  | UK [England]  | 2017 | human stool | N | N |
| 69327 | NWC2000  | UK [England]  | 2017 | human stool | N | N |
| 69328 | OXC11277 | UK [England]  | 2017 | human stool | N | N |
| 69340 | NWC2002  | UK [England]  | 2017 | human stool | N | N |
| 69343 | NWC2013  | UK [England]  | 2017 | human stool | N | N |
| 69345 | NWC2001  | UK [England]  | 2017 | human stool | N | N |
| 69353 | NWC2010  | UK [England]  | 2017 | human stool | N | N |
| 69359 | NWC2014  | UK [England]  | 2017 | human stool | N | Y |
| 69361 | NWC2004  | UK [England]  | 2017 | human stool | N | Y |
| 69364 | OXC11285 | UK [England]  | 2017 | human stool | N | N |
| 69373 | OXC11249 | UK [England]  | 2017 | human stool | N | N |
| 69423 | OXC11243 | UK [England]  | 2017 | human stool | N | Y |
| 69428 | NWC1971  | UK [England]  | 2017 | human stool | N | N |
| 69435 | OXC11247 | UK [England]  | 2017 | human stool | N | N |
| 69460 | NWC1963  | UK [England]  | 2017 | human stool | N | N |
| 69479 | OXC11213 | UK [England]  | 2017 | human stool | N | N |
| 69484 | OXC11226 | UK [England]  | 2017 | human stool | N | Y |
| 69508 | NWC1932  | UK [England]  | 2017 | human stool | N | N |
| 69511 | OXC11209 | UK [England]  | 2017 | human stool | N | N |
| 69659 | OXC11280 | UK [England]  | 2017 | human stool | N | N |
| 69670 | OXC11208 | UK [England]  | 2017 | human stool | N | Y |
| 69676 | NWC1984  | UK [England]  | 2017 | human stool | N | N |
| 69840 | NWC2119  | UK [England]  | 2017 | human stool | N | Y |
| 69846 | NWC2101  | UK [England]  | 2017 | human stool | N | Y |
| 69860 | NWC2084  | UK [England]  | 2017 | human stool | N | N |
| 69881 | NWC2105  | UK [England]  | 2017 | human stool | N | N |
| 69882 | NWC2093  | UK [England]  | 2017 | human stool | N | Y |
| 69894 | OXC11365 | UK            | 2017 | human stool | N | N |
| 69898 | NWC2134  | UK [England]  | 2017 | human stool | N | N |
| 69902 | OXC11374 | UK [England]  | 2017 | human stool | N | N |
| 69965 | FDI375   | UK            | 2017 | beef        | N | N |
| 70022 | OXC11414 | UK [England]  | 2018 | human stool | N | N |
| 70047 | NWC2177  | UK [England]  | 2017 | human stool | N | Y |

|       |          |              |      |             |   |   |
|-------|----------|--------------|------|-------------|---|---|
| 70048 | NWC2178  | UK [England] | 2017 | human stool | N | Y |
| 70053 | OXC11410 | UK [England] | 2017 | human stool | N | N |
| 70075 | NWC2206  | UK [England] | 2018 | human stool | N | N |
| 70097 | OXC11436 | UK [England] | 2018 | human stool | N | N |
| 70100 | OXC11438 | UK [England] | 2017 | human stool | N | N |
| 70106 | NWC2227  | UK [England] | 2018 | human stool | N | N |
| 70108 | NWC2226  | UK [England] | 2018 | human stool | N | N |
| 70110 | FDI452   | UK           | 2018 | beef        | N | N |
| 70113 | NWC2224  | UK [England] | 2018 | human stool | N | N |
| 70116 | OXC11441 | UK [England] | 2018 | human stool | N | N |
| 70126 | NWC2229  | UK [England] | 2018 | human stool | N | N |
| 70127 | NWC2222  | UK [England] | 2018 | human stool | N | N |
| 70128 | OXC11439 | UK [England] | 2018 | human stool | N | N |
| 70137 | OXC11433 | UK [England] | 2018 | human stool | N | N |
| 70165 | NWC2232  | UK [England] | 2018 | human stool | N | Y |
| 70560 | NWC2273  | UK [England] | 2018 | human stool | N | N |
| 70663 | NWC2249  | UK [England] | 2018 | human stool | N | N |
| 70687 | NWC2262  | UK [England] | 2018 | human stool | N | N |
| 70693 | NWC2255  | UK [England] | 2018 | human stool | N | N |
| 70761 | NWC2325  | UK [England] | 2018 | human stool | N | N |
| 70763 | OXC11518 | UK [England] | 2018 | human stool | N | N |
| 70807 | OXC11509 | UK [England] | 2018 | human stool | N | N |
| 70813 | NWC2352  | UK [England] | 2018 | human stool | N | N |
| 70814 | OXC11537 | UK [England] | 2018 | human stool | N | N |
| 70868 | NWC2355  | UK [England] | 2018 | human stool | N | N |
| 70870 | OXC11538 | UK [England] | 2018 | human stool | N | N |
| 70877 | 2-5      | UK           | 2014 | human stool | N | N |
| 70878 | 2-10     | UK           | 2014 | human stool | N | N |
| 70885 | 4-52     | UK           | 2014 | human stool | N | N |
| 70886 | 4-51     | UK           | 2014 | human stool | N | N |
| 70891 | 2-9      | UK           | 2014 | human stool | N | N |
| 70899 | D1-81    | UK           | 2014 | human stool | N | N |
| 70900 | D2-11    | UK           | 2014 | human stool | N | N |
| 70903 | D2-36    | UK           | 2014 | human stool | N | N |
| 70904 | D2-9     | UK           | 2014 | human stool | N | N |
| 70905 | D3-17    | UK           | 2014 | human stool | N | Y |
| 70909 | D4-51    | UK           | 2014 | human stool | N | N |
| 70914 | D4-7     | UK           | 2014 | human stool | N | N |
| 70916 | D4-79    | UK           | 2014 | human stool | N | N |
| 70919 | D5-80    | UK           | 2014 | human stool | N | N |
| 70923 | D6-57    | UK           | 2014 | human stool | N | N |
| 70930 | D7-62    | UK           | 2014 | human stool | N | N |
| 70943 | Po_1     | Finland      | 2002 | human stool | N | N |
| 70944 | Po_2     | Finland      | 2002 | human stool | N | N |
| 70945 | Ma_1     | Finland      | 2002 | cows milk   | N | N |
| 70946 | Ma_B     | Finland      | 2003 | cows milk   | N | N |
| 70947 | Le_204R  | Finland      | 2003 | cattle      | N | N |

|       |          |              |      |             |   |   |
|-------|----------|--------------|------|-------------|---|---|
| 70948 | Le_755   | Finland      | 2003 | cattle      | N | N |
| 76522 | OXC11551 | UK           | 2016 | human stool | N | N |
| 76523 | NWC2374  | UK [England] | 2016 | human stool | N | N |
| 76528 | OXC11555 | UK           | 2016 | human stool | N | N |
| 76535 | NWC2385  | UK [England] | 2018 | human stool | N | N |
| 76579 | NWC2404  | UK [England] | 2018 | human stool | N | N |
| 76581 | NWC2398  | UK [England] | 2018 | human stool | N | N |
| 76597 | NWC2430  | UK [England] | 2018 | human stool | N | N |
| 76608 | NWC2419  | UK [England] | 2018 | human stool | N | N |
| 76667 | NWC2508  | UK [England] | 2018 | human stool | N | N |
| 76679 | OXC11646 | UK [England] | 2018 | human stool | N | N |
| 76689 | NWC2502  | UK [England] | 2018 | human stool | N | Y |
| 76701 | NWC2491  | UK [England] | 2018 | human stool | N | N |
| 76725 | OXC11654 | UK [England] | 2018 | human stool | N | N |
| 76743 | NWC2520  | UK [England] | 2018 | human stool | N | N |
| 76754 | NWC2527  | UK [England] | 2018 | human stool | N | N |
| 76808 | OXC11673 | UK [England] | 2018 | human stool | N | Y |
| 76814 | NWC2579  | UK [England] | 2018 | human stool | N | N |
| 76823 | NWC2580  | UK [England] | 2018 | human stool | N | Y |
| 76843 | NWC2570  | UK [England] | 2018 | human stool | N | N |
| 76847 | NWC2577  | UK [England] | 2016 | human stool | N | N |
| 76855 | NWC2578  | UK [England] | 2018 | human stool | N | N |
| 76856 | NWC2575  | UK [England] | 2018 | human stool | N | N |
| 76858 | OXC11705 | UK [England] | 2018 | human stool | N | N |
| 76902 | FDI580   | UK           | 2018 | chicken     | N | N |
| 76950 | OXC11754 | UK [England] | 2018 | human stool | N | Y |
| 76954 | NWC2640  | UK [England] | 2016 | human stool | N | N |
| 76980 | NWC2651  | UK [England] | 2018 | human stool | N | N |
| 76992 | NWC2663  | UK [England] | 2018 | human stool | N | N |
| 77003 | NWC2679  | UK [England] | 2018 | human stool | N | Y |
| 77008 | OXC11774 | UK [England] | 2018 | human stool | N | N |
| 77026 | OXC11785 | UK [England] | 2018 | human stool | N | N |
| 77103 | NWC2725  | UK [England] | 2016 | human stool | N | N |
| 77118 | FDI603   | UK           | 2017 | chicken     | N | N |
| 77119 | OXC11816 | UK [England] | 2018 | human stool | N | N |
| 77145 | NWC2737  | UK [England] | 2018 | human stool | N | N |
| 77158 | OXC11844 | UK [England] | 2018 | human stool | N | N |
| 77159 | NWC2756  | UK [England] | 2018 | human stool | N | N |
| 77174 | NWC2765  | UK [England] | 2018 | human stool | N | Y |
| 77225 | NWC2811  | UK [England] | 2018 | human stool | N | Y |
| 77235 | OXC11877 | UK [England] | 2018 | human stool | N | N |
| 77259 | NWC2442  | UK [England] | 2018 | human stool | N | Y |
| 77279 | NWC2446  | UK [England] | 2018 | human stool | N | N |
| 77283 | NWC2453  | UK [England] | 2018 | human stool | N | N |
| 77285 | OXC11618 | UK [England] | 2018 | human stool | N | N |
| 77288 | NWC2456  | UK [England] | 2018 | human stool | N | N |
| 77290 | OXC11612 | UK [England] | 2018 | human stool | N | N |

|       |                     |              |      |             |   |   |
|-------|---------------------|--------------|------|-------------|---|---|
| 77291 | NWC2448             | UK [England] | 2018 | human stool | N | N |
| 77298 | OXC11616            | UK [England] | 2018 | human stool | N | N |
| 77445 | WTCHG_507474_201107 | UK           |      |             | N | N |
| 77447 | OXC2089             | UK           | 2006 | human stool | N | Y |
| 77474 | OXC2062             | UK           | 2006 | human stool | N | Y |
| 77530 | PHEHIST005          | UK           | 1997 | human stool | N | N |
| 77608 | PHEHIST045          | UK           | 1997 | human stool | N | N |
| 77676 | PHEHIST094          | UK           | 1997 | human stool | N | Y |
| 77678 | PHEHIST096          | UK           | 1997 | human stool | N | N |
| 77753 | PHEHIST163          | UK           | 1997 | human stool | N | N |
| 77763 | PHEHIST171          | UK           | 1997 | human stool | N | N |
| 77768 | PHEHIST175          | UK           | 1997 | human stool | N | N |
| 77817 | PHEHIST215          | UK           |      | human stool | N | N |
| 77909 | PHEHIST291          | UK           | 1997 | human stool | N | N |
| 77923 | PHEHIST304          | UK           | 1997 | human stool | N | Y |
| 77965 | OXC155              | UK [England] | 2003 | human stool | N | Y |
| 77970 | OXC53               | UK [England] | 2003 | human stool | N | Y |
| 77974 | PHEHIST339          | UK           | 1997 | human stool | N | N |
| 77981 | PHEHIST346          | UK           | 1997 | human stool | N | Y |
| 78014 | OXC30               | UK [England] | 2003 | human stool | N | Y |
| 78040 | PHEHIST395          | UK           | 1998 | human stool | N | Y |
| 78137 | NWC2816             | UK [England] | 2018 | human stool | N | N |
| 78162 | OXC11893            | UK [England] | 2018 | human stool | N | N |
| 78166 | NWC2827             | UK [England] | 2018 | human stool | N | N |
| 78171 | OXC11898            | UK [England] | 2018 | human stool | N | N |
| 78175 | OXC11896            | UK [England] | 2018 | human stool | N | N |
| 78225 | FDI697              | UK           | 2018 | chicken     | N | N |
| 78235 | FDI704              | UK           | 2017 | chicken     | N | N |
| 78251 | NWC2838             | UK [England] | 2018 | human stool | N | N |
| 78259 | NWC2846             | UK [England] | 2018 | human stool | N | N |
| 78261 | NWC2851             | UK [England] | 2018 | human stool | N | N |
| 78266 | FDI719              | UK           | 2018 | lamb        | N | N |
| 78270 | OXC11920            | UK [England] | 2018 | human stool | N | N |
| 78348 | OXC11942            | UK [England] | 2018 | human stool | N | N |
| 78389 | OXC11937            | UK [England] | 2018 | human stool | N | N |
| 78391 | NWC2880             | UK [England] | 2018 | human stool | N | Y |
| 78412 | FDI784              | UK           | 2018 | chicken     | N | N |
| 78442 | OXC11957            | UK [England] | 2018 | human stool | N | N |
| 78443 | FDI790              | UK           | 2018 | chicken     | N | N |
| 78452 | NWC2898             | UK [England] | 2018 | human stool | N | N |
| 78458 | FDI812              | UK           | 2018 | chicken     | N | N |
| 78466 | FDI814              | UK           | 2018 | chicken     | N | N |
| 78473 | FDI829              | UK           | 2018 | chicken     | N | N |
| 78871 | PHEHIST464          | UK           | 1998 | human stool | N | N |
| 79837 | RL16000343          | UK [England] | 2016 | chicken     | N | N |
| 79849 | RL16003794          | UK [England] | 2016 | chicken     | N | N |
| 79980 | OXC286              | UK           |      |             | N | Y |

|        |            |              |      |             |   |   |
|--------|------------|--------------|------|-------------|---|---|
| 80227  | 14S        | Poland       |      | human stool | N | N |
| 80239  | 37S        | Poland       |      | human stool | N | N |
| 80293  | RL17000157 | UK [England] | 2017 | chicken     | N | N |
| 107059 | 8359       | Finland      | 2014 | wild bird   | N | N |
| 107060 | 8360       | Finland      | 2014 | wild bird   | N | Y |
| 108789 | 6H         | Estonia      | 2018 | human       | N | N |
| 108827 | 7.17H      | Estonia      | 2017 | human       | N | N |
| 110009 | LNS1271330 | Luxembourg   | 2020 | human stool | N | N |
| 110016 | LNS1881298 | Luxembourg   | 2019 | human stool | N | N |
| 110024 | LNS2680632 | Luxembourg   | 2020 | human stool | N | N |
| 110031 | LNS3878735 | Luxembourg   | 2018 | human stool | N | N |
| 110052 | LNS4808088 | Luxembourg   | 2019 | human stool | N | N |
| 110054 | LNS4847690 | Luxembourg   | 2019 | human stool | N | Y |
| 110065 | LNS5952364 | Luxembourg   | 2016 | chicken     | N | N |
| 110094 | LNS9143194 | Luxembourg   | 2021 | human stool | N | Y |
| 110975 | KF017      | Poland       | 2010 | human stool | N | N |
| 111135 | Cj-4207    | Portugal     | 2021 | human stool | N | Y |
| 111137 | Cj-4199    | Portugal     | 2021 | human stool | N | Y |
| 111141 | Cj-4096    | Portugal     | 2020 | human stool | N | N |
| 111149 | Cj-4137    | Portugal     | 2020 | human stool | N | N |
| 111231 | CAM3       | Spain        | 2020 | human stool | N | N |

<sup>1</sup> unk: an incomplete gene sequence and could not determine if it was functional; Y: present ; N: no gene

<sup>2</sup> unk: an incomplete gene sequence and could not determine if it was functional; Y: present ; N: no gene

<sup>3</sup> wt: wt *cts* genes; D: *ctsD* mutation; DE: *ctsDE* mutation; E: *ctsE* mutation; F: *ctsF* mutation
