# Supplementary material for: Genomic Analysis Points to Multiple Genetic Mechanisms for Non-Transformable Campylobacter jejuni ST-50
Source: Microorganisms. 2024 Feb 4;12(2):327. doi: 10.3390/microorganisms12020327 (PMC10893306; doi:10.3390/microorganisms12020327)
Supplement: Supplementary file 1 [file microorganisms-12-00327-s001.zip]

Archive with 6 entries (6 files):
- Figure S1-Parker_et_al2024.pdf
- Table S1-Parker_et_al2024.pdf
- Table S2-Parker_et_al2024.pdf
- Table S3-Parker_et_al2024.pdf
- TableS4-Parker_et_al2024.pdf
- TableS5-Parker_et_al2024.pdf
